# SREBP Coordinates Iron and Ergosterol Homeostasis to Mediate Triazole Drug and Hypoxia Responses in the Human Fungal Pathogen *Aspergillus fumigatus*

Michael Blatzer<sup>1</sup>✉, Bridget M. Barker<sup>2</sup>✉, Sven D. Willger<sup>2</sup>, Nicola Beckmann<sup>1</sup>, Sara J. Blosser<sup>2</sup>, Elizabeth J. Cornish<sup>2</sup>, Aurelien Mazurie<sup>3</sup>, Nora Grahl<sup>2</sup>, Hubertus Haas<sup>1</sup>\*†, Robert A. Cramer<sup>2</sup>\*†

**1** Division of Molecular Biology/Biocenter, Innsbruck Medical University, Innsbruck, Austria, **2** Department of Immunology and Infectious Diseases, Montana State University, Bozeman, Montana, United States of America, **3** Bioinformatics Core and Department of Microbiology, Montana State University, Bozeman, Montana, United States of America

## Abstract

Sterol regulatory element binding proteins (SREBPs) are a class of basic helix-loop-helix transcription factors that regulate diverse cellular responses in eukaryotes. Adding to the recognized importance of SREBPs in human health, SREBPs in the human fungal pathogens *Cryptococcus neoformans* and *Aspergillus fumigatus* are required for fungal virulence and susceptibility to triazole antifungal drugs. To date, the exact mechanism(s) behind the role of SREBP in these observed phenotypes is not clear. Here, we report that *A. fumigatus* SREBP, SrbA, mediates regulation of iron acquisition in response to hypoxia and low iron conditions. To further define SrbA's role in iron acquisition in relation to previously studied fungal regulators of iron metabolism, SreA and HapX, a series of mutants were generated in the  $\Delta$ srbA background. These data suggest that SrbA is activated independently of SreA and HapX in response to iron limitation, but that HapX mRNA induction is partially dependent on SrbA. Intriguingly, exogenous addition of high iron or genetic deletion of sreA in the  $\Delta$ srbA background was able to partially rescue the hypoxia growth, triazole drug susceptibility, and decrease in ergosterol content phenotypes of  $\Delta$ srbA. Thus, we conclude that the fungal SREBP, SrbA, is critical for coordinating genes involved in iron acquisition and ergosterol biosynthesis under hypoxia and low iron conditions found at sites of human fungal infections. These results support a role for SREBP-mediated iron regulation in fungal virulence, and they lay a foundation for further exploration of SREBP's role in iron homeostasis in other eukaryotes.

**Citation:** Blatzer M, Barker BM, Willger SD, Beckmann N, Blosser SJ, et al. (2011) SREBP Coordinates Iron and Ergosterol Homeostasis to Mediate Triazole Drug and Hypoxia Responses in the Human Fungal Pathogen *Aspergillus fumigatus*. PLoS Genet 7(12): e1002374. doi:10.1371/journal.pgen.1002374

**Editor:** Hiten D. Madhani, University of California San Francisco, United States of America

**Received:** May 26, 2011; **Accepted:** September 22, 2011; **Published:** December 1, 2011

**Copyright:** © 2011 Blatzer et al. This is an open-access article distributed under the terms of the Creative Commons Attribution License, which permits unrestricted use, distribution, and reproduction in any medium, provided the original author and source are credited.

**Funding:** This work was supported by the Austrian Science Foundation FWF P18606-B11 and FWF P21643-B11 (HH), National Institute of Health grant RR020185 (M. Quinn PI, RAC project 2 leader), NIH/NIAID grant R01AI81838 (RAC), and the Montana State University Agricultural Experiment Station (RAC). SJB is supported by a pre-doctoral fellowship from the American Heart Association. The funders had no role in study design, data collection and analysis, decision to publish, or preparation of the manuscript.

**Competing Interests:** The authors have declared that no competing interests exist.

\* E-mail: hubertus.haas@i-med.ac.at (HH); rcramer@montana.edu (RAC)

✉ These authors contributed equally to this work.

† These authors also contributed equally to this work.

## Introduction

Fungal pathogens face numerous environmental challenges during growth in mammalian hosts that can determine outcomes of host-pathogen interactions. A major factor in host defense against invading fungi is the sequestration of iron, which prevents in vivo fungal growth [1]. Consequently, most fungal pathogens have evolved mechanisms to obtain iron from their hosts and these mechanisms are established fungal virulence attributes [2,3,4,5,6,7,8]. Intriguingly, an association between responses to iron and oxygen limitation emerged from studies in rodents demonstrating increased iron absorption in response to hypoxia [9]. Moreover, hypoxia is known to increase the expression of transferrin, which increases iron availability to host cells under hypoxic stress [10]. The key transcriptional regulator of mammalian responses to hypoxia, hypoxia inducible factor-1 (HIF), has been found to regulate several genes involved in iron metabolism

[11,12,13,14]. Thus, an intimate link exists between cellular responses to low oxygen environments and iron availability in eukaryotes. Yet, mechanisms of regulation of this potential link in human pathogenic fungi are largely unknown.

Previous results strongly suggest that mechanisms of both iron acquisition and hypoxia adaptation are critical for fungi to cause disease in humans. Strains of the human fungal pathogen *Aspergillus fumigatus* that no longer make any iron-sequestering siderophores are fully avirulent, while strains deficient in either extracellular or intracellular siderophore production display attenuated virulence [4,5,6]. Regulation of iron acquisition in *A. fumigatus* and other fungi that make siderophores is mediated by two key transcription factors SreA and HapX [2,15]. Null mutants of SreA display increased siderophore production and as expected remain fully virulent in animal models of invasive pulmonary aspergillosis. Conversely, null mutants of HapX have a reduced ability to produce siderophores and are consequently significantly

## Author Summary

Advances in medical technologies over the past several years have led to an increasing population of patients susceptible to fungal infections. Despite the immunocompromised condition of most patients that acquire these infections, the majority are caused by three fungi: *Candida albicans*, *Cryptococcus neoformans*, and *Aspergillus fumigatus*. Of these, *A. fumigatus* is least studied, and the ability of this fungus to cause lethal disease in these patients needs more examination. We previously identified a transcription factor in the sterol-regulatory element binding protein family, *SrbA*, in this pathogenic mold that is critical for virulence and susceptibility to triazole antifungal drugs. The mechanism by which *SrbA* mediates these clinically relevant phenotypes is unclear. Here, we discover that *SrbA* is critical for regulation of iron metabolism, particularly through regulation of siderophore production and uptake. We find that *A. fumigatus* requires iron uptake during the initial phases of adaptation to hypoxic microenvironments and that restoration of iron uptake in the *srbA* null mutant is able to partially restore the hypoxia growth defect and triazole susceptibility of this mutant. Taken together, our results identify a new role for this important fungal SREBP and give new insights into the clinically relevant roles of *SrbA*.

attenuated in virulence. Recently, a third transcription factor, *AcuM*, has been hypothesized to repress *SreA* and transcriptionally induce *HapX* via transcriptome profiling experiments [16]. Though it is unclear if the effects of *AcuM* on *SreA* and *HapX* are indirect or direct, *AcuM* null mutants have decreased siderophore production and attenuated virulence [16]. Data from these studies strongly suggest the presence of additional unidentified regulators of iron metabolism in fungi.

An appreciation for the involvement of hypoxia in fungal pathogenesis is recent and strongly supported by characterization of fungal sterol regulatory element binding protein (SREBP) null mutants that are incapable of growth in hypoxia, attenuated in fungal virulence, and more susceptible to triazole antifungal drugs [17,18,19,20,21,22]. SREBPs are a unique family of membrane bound basic helix-loop-helix (bHLH) transcription factors that mediate a diverse array of biological processes in eukaryotic organisms [23]. In mammals, SREBPs have been observed to regulate cholesterol, lipid, and carbohydrate metabolism whereas in cholesterol auxotrophs such as *Drosophila melanogaster* and *Caenorhabditis elegans* SREBPs function to regulate fatty acid biosynthesis and development [24,25,26,27,28]. In *Schizosaccharomyces pombe* and *Cryptococcus neoformans*, SREBPs transcriptionally regulate genes involved in responses to low oxygen with the ergosterol biosynthesis pathway being an important downstream effector [17,18,29,30]. A preliminary characterization of the *A. fumigatus* SREBP affected transcriptome adds further support to the conclusion that fungal SREBPs are key transcriptional regulators of ergosterol biosynthesis [19]. Yet, the key SREBP mediated downstream effectors in *A. fumigatus* remain to be fully elucidated. Discovering the SREBP mediated regulon in *A. fumigatus* and other human pathogenic fungi is critical for fully understanding the role of this transcriptional regulator in fungal pathogenesis.

In this study, we utilized microarray-based transcriptomics and molecular genetics to further define the role of the SREBP *SrbA* in *A. fumigatus*. We report that in *A. fumigatus* *SrbA* is an unidentified regulator of iron homeostasis. Additionally, we observe that *SrbA*'s role in iron metabolism is intimately linked with *SrbA*'s previously

identified role in hypoxia adaptation and triazole drug susceptibility. Together, these results advance our understanding of regulation of fungal iron homeostasis and provide new evidence for understanding the role of fungal SREBPs in fungal virulence, hypoxia adaptation, and antifungal drug susceptibility.

## Results

### Hypoxia Transcriptome analysis of the *A. fumigatus* SREBP null mutant reveals downstream effectors associated with ergosterol biosynthesis and iron acquisition

Previously, we reported that loss of the SREBP, *SrbA*, in the human fungal pathogen *A. fumigatus* resulted in loss of hypoxia growth, increased susceptibility to triazole antifungal drugs, and a significant attenuation in virulence [19]. To better understand the mechanisms of the previously observed *SrbA* dependent clinically relevant phenotypes, we sought to identify potential *SrbA* downstream effectors in *A. fumigatus*. We compared whole genome transcript level profiles of wild-type and the SREBP null mutant,  $\Delta$ *srbA*, in response to hypoxia (1% O<sub>2</sub>, 5% CO<sub>2</sub>, 94% N<sub>2</sub>). Because  $\Delta$ *srbA* cannot grow in hypoxia, a shift experiment was done whereby both strains were grown in normoxic conditions to the germling stage, then shifted to hypoxia conditioned media for defined time points. Transcriptome profiles at 1, 2, and 4 hours post exposure to hypoxia were measured with microarrays and reveal dramatic changes in the fungal transcriptome due to loss of *SrbA* activity (Tables S1, S2, S3, S4, S5, S6 and Figure 1). At one-hour post exposure to hypoxia, levels of mRNA from 639 genes were reduced  $\geq 2$  fold in the absence of *SrbA* (6.5% of the genome) (Table S1). mRNA from an additional 524 genes was increased  $\geq 2$  fold due to absence of *SrbA* (5.3% of the genome) (Table S2). Thus, upon initial exposure to hypoxia, approximately 12% of *A. fumigatus* genes are affected by *SrbA* activity. At 2 hours post-exposure to hypoxia, the number of mRNAs whose abundance decreased  $\geq 2$  fold increased to 773 (Table S3) and the number of mRNAs whose abundance increased  $\geq 2$  fold increased to 727 (Table S4). Finally, at 4 hours post-exposure to hypoxia, 602 mRNAs remained transcriptionally decreased  $\geq 2$  fold (Table S5) while 667 mRNAs remained  $\geq 2$  fold transcriptionally increased (Table S6). Manual gene ontology analysis as well as Gene set enrichment analysis (GSEA) of available GO terms suggested an *SrbA* dependency for ergosterol biosynthesis, iron acquisition, glycolysis, ribosome biogenesis, and amino acid biosynthesis (Figure S1, S2, S3; Tables S7, S8, S9). Taken together, these results suggest that *SrbA* is a major transcriptional regulator in *A. fumigatus* that may act as both a positive and negative regulator of transcription.

Previous studies in *S. pombe*, *C. neoformans*, and *A. fumigatus* strongly suggested that fungal SREBPs are key regulators of ergosterol biosynthesis. Thus, not surprisingly, levels of mRNAs encoding *Erg24*, *Erg3*, and *Erg25A* were all at least 20 fold less abundant at one hour post-exposure to hypoxia in the absence of *SrbA* (Figure 1A, Table S1). The levels of mRNA from these genes remained substantially reduced at 2 and 4 hours and confirm our previously reported sterol profiles of the *SrbA* null mutant that demonstrated a partial block in ergosterol biosynthesis at the level of C4-demethylation [19]. In addition, and in contrast to our previously published analysis of a 24 hour time point transcriptome, levels of mRNA from several key genes encoding enzymes involved in iron homeostasis were found to be reduced at least 6 fold in the absence of *SrbA* (Figure 1B, Tables S1, S3, S5). The decrease in mRNA of genes associated with iron metabolism suggests that the initial response to hypoxia of *A. fumigatus* involves

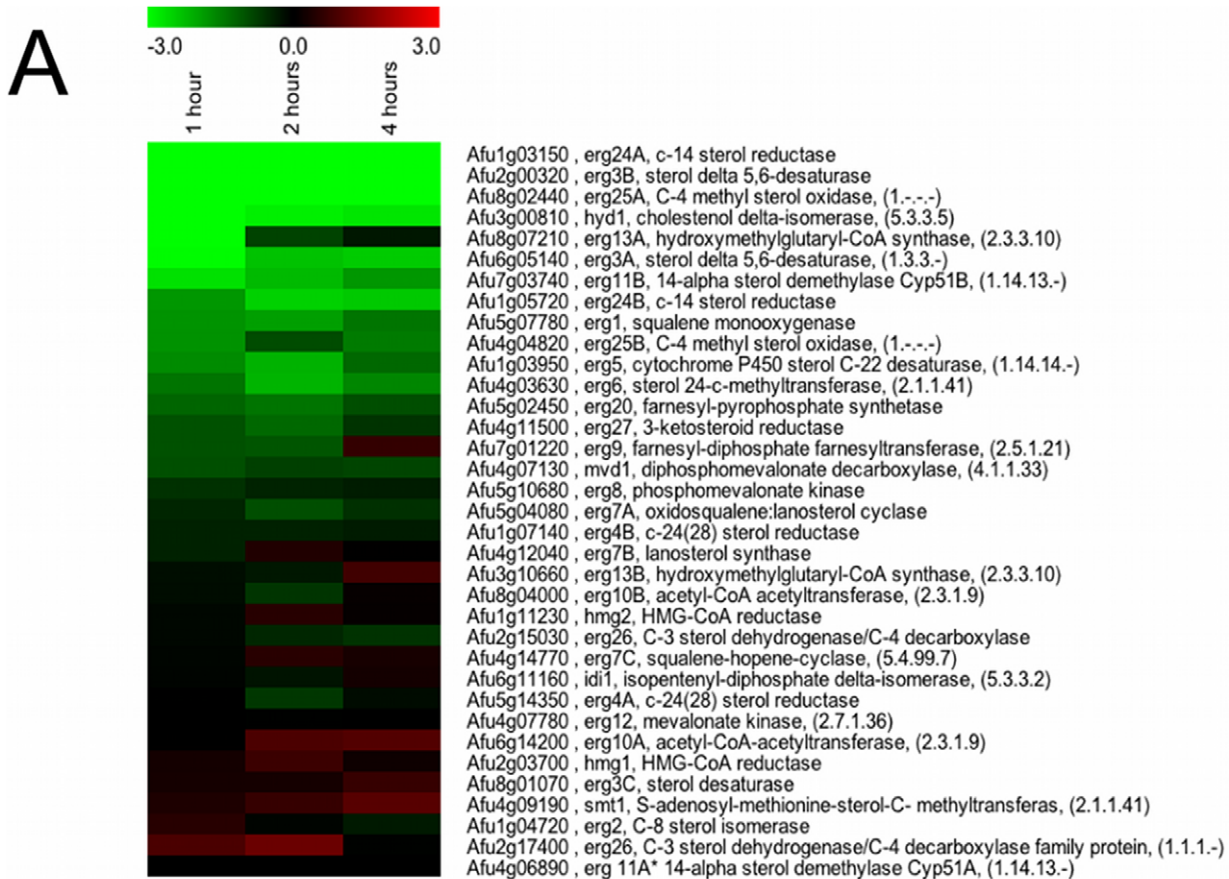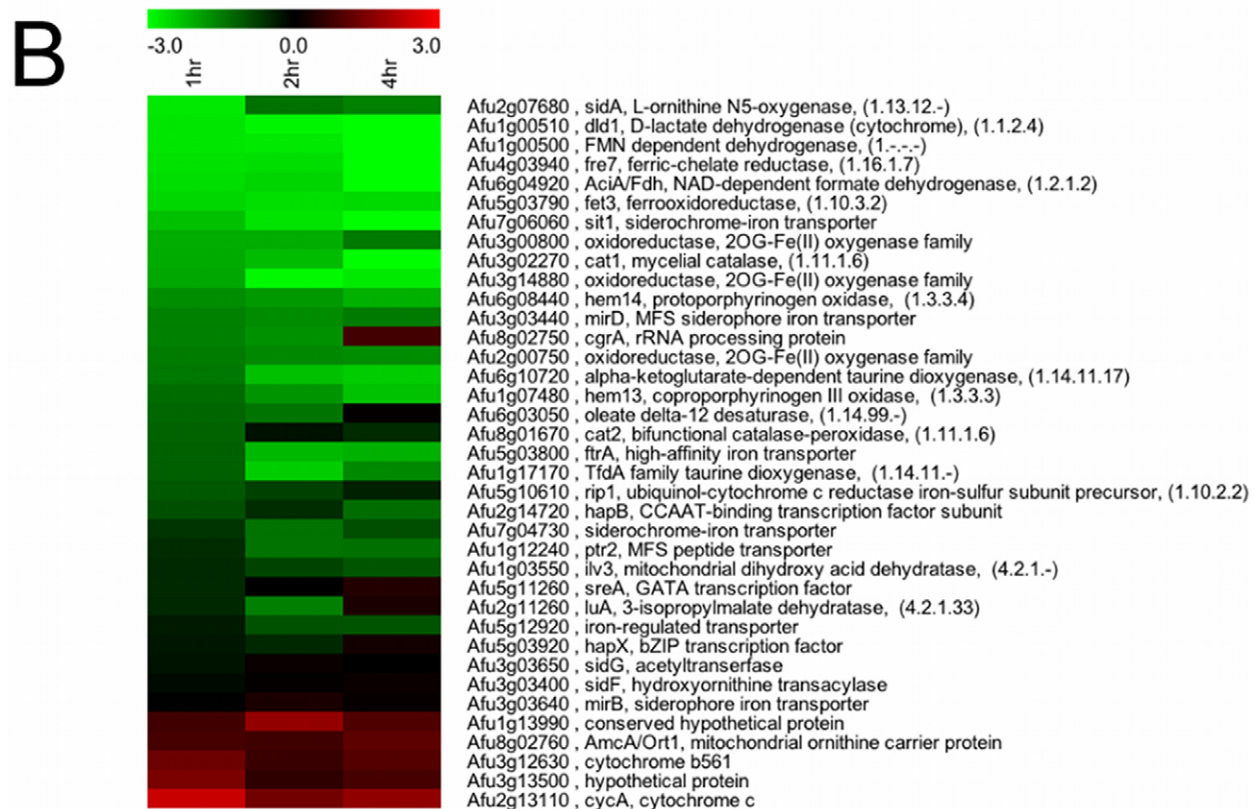



**Figure 1. *SrbA* regulates genes encoding enzymes involved in ergosterol biosynthesis and iron metabolism in response to hypoxia.** (A) Heat map representation of gene transcripts involved in ergosterol biosynthesis that are affected by *A. fumigatus* *SrbA* (B) Heat map representation of gene transcripts involved in iron metabolism that are affected by *SrbA*. A complete list of differentially expressed genes is available in Tables S1, S2, S3, S4. Data compare wild-type *A. fumigatus* to the  $\Delta$ *srbA* strain at the indicated times after exposure to hypoxic conditions, such that wild-type transcript levels after one hour hypoxia exposure is compared to  $\Delta$ *srbA* after one hour. Red indicates transcript levels are higher in  $\Delta$ *srbA* (fold changes are log base 2). Three biological replicates each with dye flips were performed for each time point examined. doi:10.1371/journal.pgen.1002374.g001

transcriptional induction of genes involved in iron acquisition. This result supports previous studies in mammals that demonstrate a tight link between hypoxia adaptation and iron homeostasis. In *A. fumigatus*, mRNA levels of *sidA*, an L-ornithine monooxygenase that catalyzes the first step in siderophore biosynthesis were reduced in the absence of *SrbA* (Figure 1B and Figure 2). Reduction in *sidA* mRNA levels would be expected to decrease both extracellular and intracellular siderophore production in *A. fumigatus*. mRNA from other genes involved in iron acquisition were also less abundant in the absence of *SrbA* including, the siderophore transporters *mirB* and *sit1*, the high affinity iron transporter *fitA*, and the ferrooxidoreductase *fetC* involved in reductive iron assimilation. We further confirmed the *SrbA* dependency for transcription of iron associated genes in response to hypoxia utilizing qRT-PCR (Figure 2). At 1, 2, and 4 hours, exposure to hypoxia reduced transcript levels of *fetC*, *sidA*, and *sit1* in the absence of *SrbA*. Transcript levels of *fitA* were *SrbA* dependent at 1 hour post-exposure to hypoxia, but increased at 2 and 4 hours via an unknown mechanism. Taken together, these results suggest that *SrbA* is a critical regulatory factor for iron homeostasis during the initial response to hypoxia.

We next asked the question whether *SrbA* directly or indirectly regulated transcriptional regulation of ergosterol biosynthesis and iron acquisition. Wild-type and  $\Delta$ *srbA* strains were cultivated as for the microarray and qRT-PCR experiments, and at 4 hours

post-exposure to hypoxia chromatin immunoprecipitation (ChIP) was performed using IgG and polyclonal *SrbA* (amino acids 1–275) antibodies. Immunoprecipitated DNA was quantified for *erg25A*, *erg11A*, *sit1*, and *sidA* using primers targeted to the promoter regions of these genes. Significant enrichment for *SrbA* binding to the promoters of *erg11A*, *erg25A*, and *sit1*, was observed indicating that *SrbA* likely directly binds to the promoters of these genes (Figure 3). However, no enrichment was observed for *sidA* indicating that *SrbA* regulation of this important siderophore biosynthesis gene may be indirect. Taken together, these results strongly suggest that *SrbA* coordinately regulates ergosterol biosynthesis and iron uptake in response to hypoxia.

### *SrbA*-deficiency impairs submersed growth during iron starvation due to iron shortage

Because iron is a critical co-factor for enzymes involved in ergosterol biosynthesis, we explored the hypothesis that *SrbA* is a positive regulator of iron acquisition independent of the known fungal iron regulators *SreA* and *HapX*. In order to compare the function of *SrbA* with that of *SreA* and *HapX*,  $\Delta$ *sreA* and  $\Delta$ *hapX* mutants were generated in CEA10 and  $\Delta$ *srbA* backgrounds as previously described for ATCC46645 [2,15]. We then tested the consequences of *SrbA*-deficiency in the generated strains in submersed liquid cultures under iron replete and iron limiting conditions. In iron replete conditions,  $\Delta$ *srbA* biomass was 54%

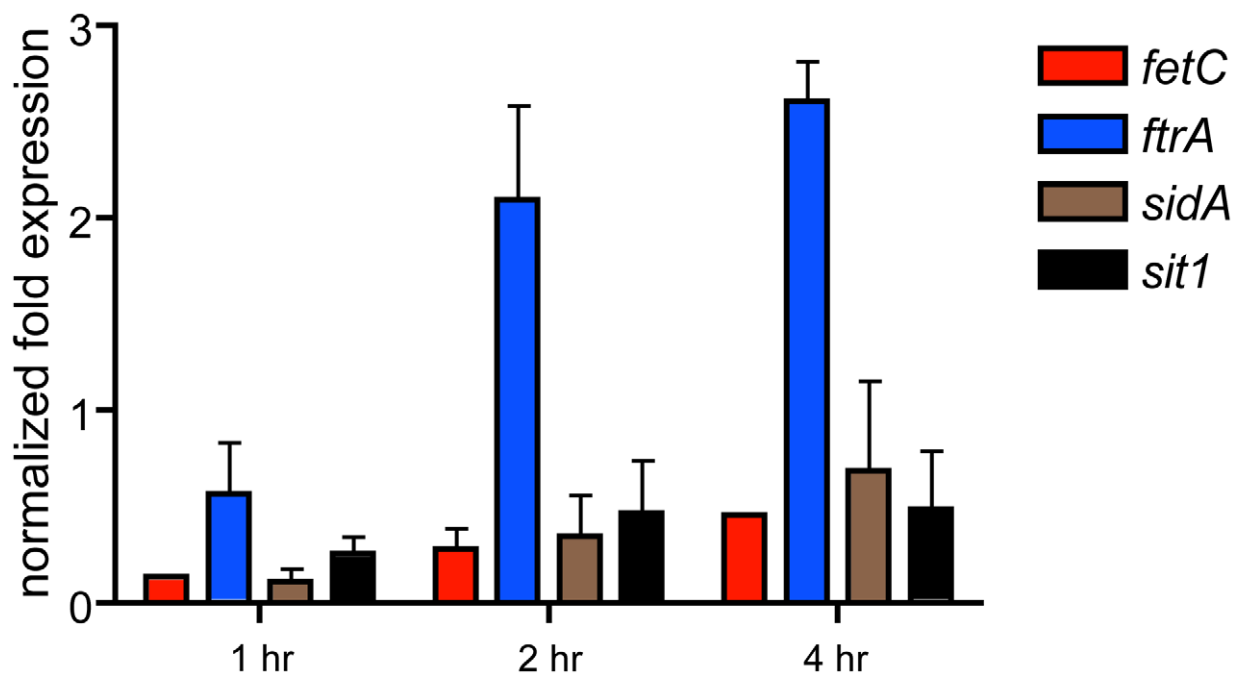

**Figure 2. qRT-PCR confirmation of *SrbA*-dependent iron homeostasis gene transcript abundance in hypoxia.** Transcript levels of *fetC*, *fitA*, *sidA*, and *sit1* were examined in normoxia then after a shift to hypoxia for 1, 2, and 4 hours in wild-type CEA10 and  $\Delta$ *srbA* strains. Transcript levels were normalized to  $\beta$ -tubulin transcript levels in each sample and data is presented relative to the wild-type transcript levels at time 0 in normoxia for each transcript using  $2^{-\Delta\Delta C_t}$  method. Normalized fold expression less than 1 indicate the transcript levels are reduced in  $\Delta$ *srbA* compared to wild-type. doi:10.1371/journal.pgen.1002374.g002

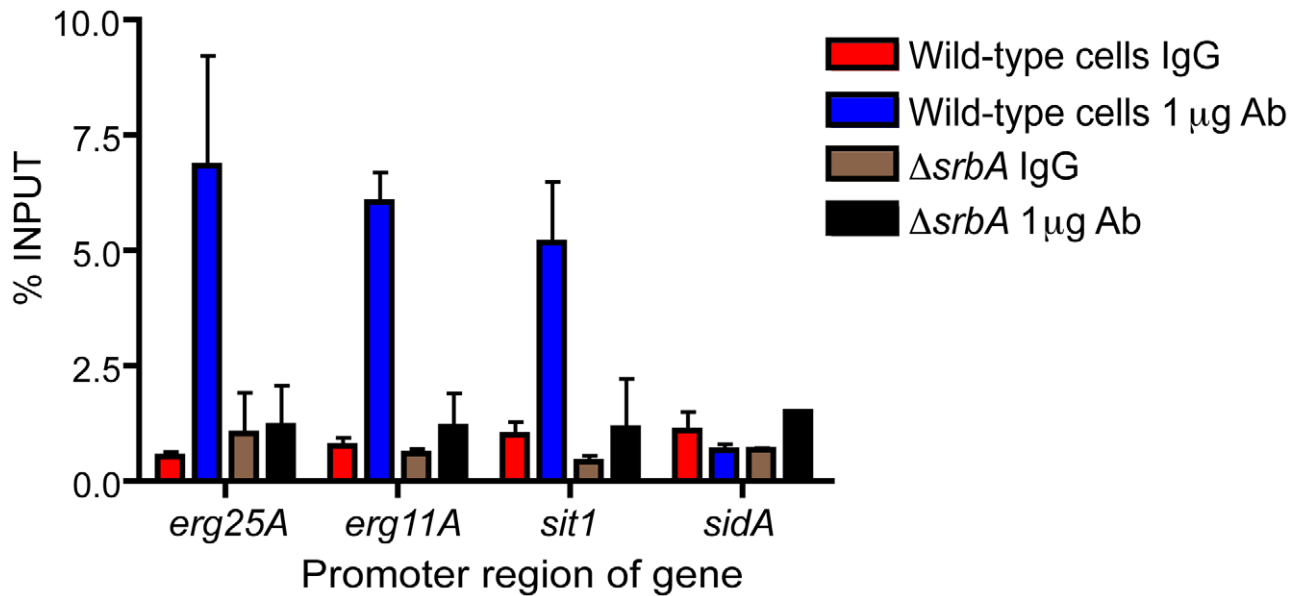

**Figure 3. Enrichment of Srba at the promoters of ergosterol biosynthesis and iron uptake genes.** Chromatin immunoprecipitation (ChIP) qPCR was performed on DNA from wild-type and  $\Delta srbA$  cells that were incubated in hypoxia for 4 hours. DNA was precipitated with either control IgG or 1  $\mu$ g of anti-Srba polyclonal antibody. Binding of Srba to putative promoter regions was assessed with qPCR and data is presented as the percent enrichment of each sample to the input control. Results are the mean and standard deviation of 2 biological ChIP replicates and two qPCR technical replicates.

doi:10.1371/journal.pgen.1002374.g003

(54.0/100.0) of the wild-type and in iron depleted conditions,  $\Delta srbA$  biomass diminished even further to 32% (18.52/57.47) of wild-type (Table 1). Importantly, the  $\Delta srbA$  reconstituted strain completely restored wild-type biomass in response to iron depletion indicating that the iron phenotype observed is specifically due to loss of Srba (Table 1). Consequently, the  $-Fe/+Fe$  biomass ratio decreased from 57% (57.47/100.00) for CEA10 to 34% (18.52/54.00) for  $\Delta srbA$  (Table 1). Thus, loss of Srba negatively affects the ability of *A. fumigatus* to deal with low iron environments supporting the observed transcriptional profiling data.

As expected, SreA-deficiency did not affect liquid biomass production during either iron-replete or iron-depleted conditions. Intriguingly, inactivation of SreA in the  $\Delta srbA$  strain increased fungal biomass by 47% in iron-depleted conditions and 20% in iron-replete conditions compared to the  $\Delta srbA$  strain itself. Consequently, this increased the  $-Fe/+Fe$  biomass ratio to 42% (Table 1). As found previously for *A. fumigatus* strain ATCC46445 [2], HapX-deficiency decreased liquid biomass production during iron starvation in *A. fumigatus* strain CEA10 by about 60% but had no significant effect during iron sufficiency because *hapX* is mainly

expressed during iron starvation [2]. Compared to  $\Delta srbA$ , additional inactivation of HapX in  $\Delta srbA$  decreased the biomass by 37% in iron depleted conditions but had no effect in iron-replete conditions (Table 1). Taken together, these data strongly support the hypothesis that Srba is required for adaptation to iron starvation independent of the known fungal iron metabolism regulators SreA and HapX.

### Srba is required for full activation of extra- and intracellular siderophore production

We next explored the mechanism behind the detrimental effects of iron starvation on  $\Delta srbA$ . Our transcriptome profiling experiments implied a potential role for Srba regulation of siderophore biosynthesis and uptake. As shown previously for *A. fumigatus* strain ATCC46445 [4,5], *A. fumigatus* strain CEA10 produces extracellular TAFC (triacylfusarinine C) exclusively during iron starvation. Intriguingly, Srba-deficiency decreased TAFC production by 90% compared to wild-type CEA10 in iron starvation conditions (Figure 4A). Similar to previous findings with *A. fumigatus* strain ATCC46445 [2,15], HapX-deficiency in CEA10 decreased TAFC production during iron starvation by

**Table 1. Srba-deficiency impairs submerged biomass production in particular during iron starvation.**

|                        | CEA10       | $\Delta sreA$ | $\Delta hapX$ | $\Delta srbA$ | $\Delta srbA$<br>$\Delta sreA$ | $\Delta srbA$<br>$\Delta hapX$ | <i>srbA</i> <sup>R</sup> |
|------------------------|-------------|---------------|---------------|---------------|--------------------------------|--------------------------------|--------------------------|
| <b>-Fe</b>             | 57.47±4.59  | 53.95±9.8     | 23.69±7.66    | 18.52±4.28    | 27.28±5.81                     | 11.63±2.08                     | 54.82±3.98               |
| <b>+Fe</b>             | 100.00±8.67 | 97.96±20.8    | 102.47±6.68   | 54.00±13.02   | 64.94±8.43                     | 52.21±2.24                     | 96.72±9.06               |
| <b>ratio<br/>-/+Fe</b> | 0.57        | 0.55          | 0.23          | 0.34          | 0.42                           | 0.22                           | 0.57                     |

Biomass production (dry mass) of  $10^8$  conidia in 200 ml liquid AMM was scored during iron starvation (-Fe) and iron sufficiency (+Fe, 30  $\mu$ M) after 24 h incubation at 37°C at 200 rpm and normalized to that of the CEA10 grown under iron sufficiency. The given values are the mean  $\pm$  STD of six biological replicates.

doi:10.1371/journal.pgen.1002374.t001

A

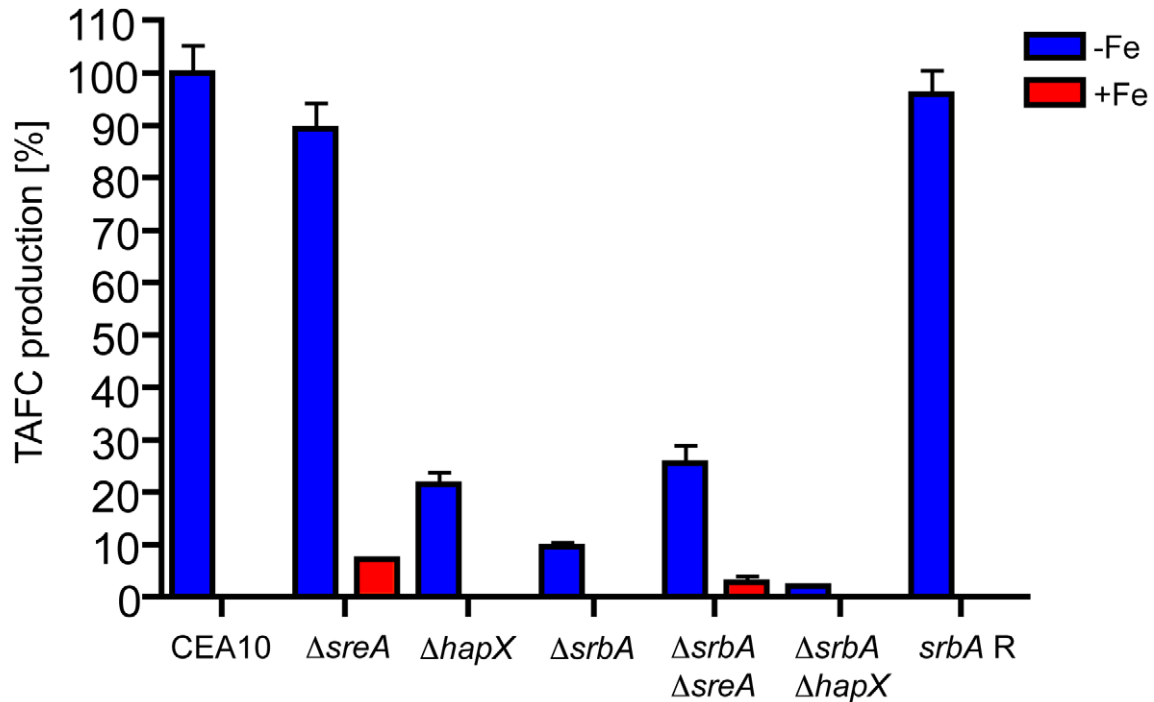

B

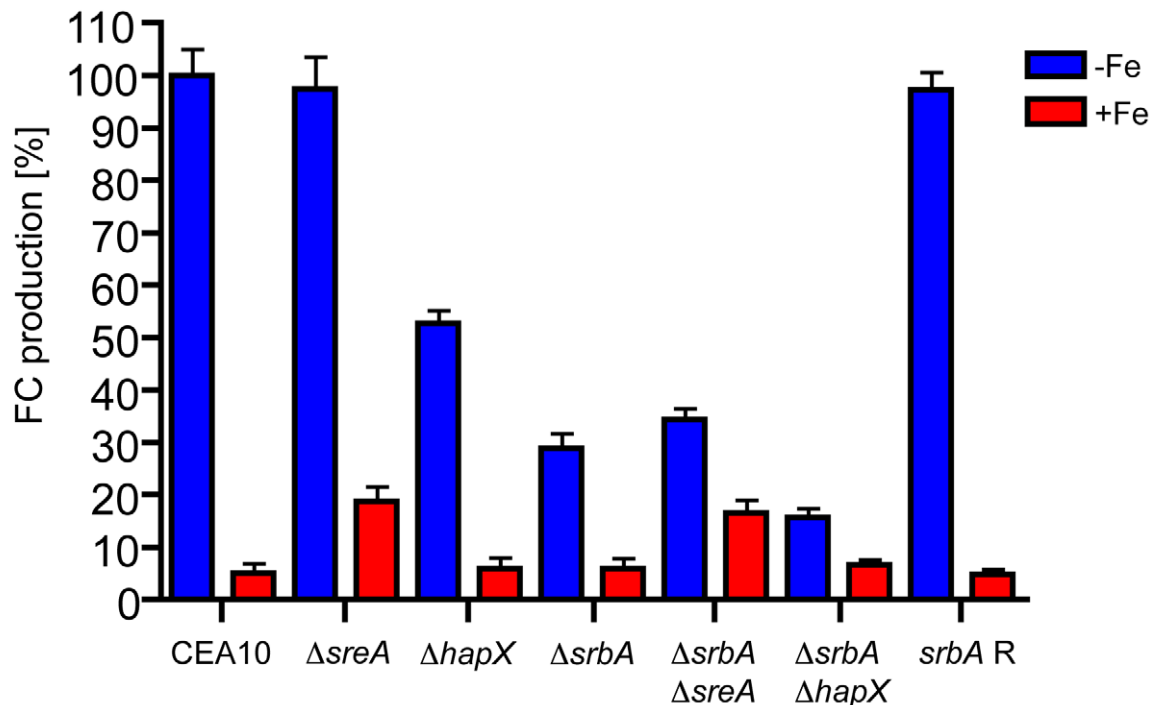

**Figure 4. *SrbA* activates extracellular and intracellular siderophore production independent of *SreA* and *HapX*.** (A) Extracellular and (B) intracellular. Quantification of extracellular TAFc and intracellular FC and after growth for 24 hours at 37°C during iron-replete (+Fe) and depleted (–Fe) conditions was normalized to the biomass of the respective strain and furthermore to that of the CEA10 during iron starvation. The given values are the mean  $\pm$  SD of six biological replicates. Under iron-replete conditions the measured FC was iron-free (desferri-FC), while under iron-replete conditions the FC was iron loaded (ferri-FC).  
doi:10.1371/journal.pgen.1002374.g004

79% during iron starvation while *SreA*-deficiency in CEA10 caused a 7% derepression of TAFc production during iron sufficiency (Figure 4A). Compared to  $\Delta srbA$ , additional deletion of *hapX* in  $\Delta srbA$  decreased TAFc production by 79% during iron

depleted conditions (Figure 4A). In contrast, additional deletion of *sreA* in  $\Delta srbA$  increased TAFc production compared to  $\Delta srbA$  by 163% during iron starvation and derepressed TAFc production to 40% of the  $\Delta sreA$  level during iron sufficiency (Figure 4A).

As shown previously for *A. fumigatus* strain ATCC46445 [4,5], *A. fumigatus* strain CEA10 accumulates intracellular FC (ferricrocin) in the ferri-form during iron sufficiency and about 20 fold higher amounts in the desferri-form during iron starvation (Figure 4B). *SrbA*-deficiency had no effect of the FC during iron sufficiency. However, *SrbA*-deficiency decreased the FC content by 71% compared to CEA10 during iron starvation (Figure 4B). Similar to previous findings with *A. fumigatus* strain ATCC46445 [2,15], *HapX*-deficiency in CEA10 decreased the FC content during iron starvation by 47% during iron starvation while *SreA*-deficiency in CEA10 increased the FC content during iron sufficiency 3.7 fold (Figure 4B). Compared to  $\Delta srbA$ , the FC content in  $\Delta srbA\Delta hapX$  is decreased by 46% during iron starvation (Figure 4B). In contrast, additional deletion of *SreA* in  $\Delta srbA$  increased the FC content compared to  $\Delta srbA$  by 19% during iron starvation and 181% during iron sufficiency (Figure 4B).

Together, these data indicate that *SrbA* activates production of extra- and intracellular siderophores independent of *SreA* and *HapX*. Moreover, this biochemical data supports the observed transcriptome profile of  $\Delta srbA$  that strongly suggests a critical role for *SrbA* in regulation of siderophore biosynthesis and uptake. However, the mechanism by which *SrbA* regulates siderophore production remains to be elucidated. As production of extra- and intracellular siderophores plays a crucial role in adaptation to iron starvation [4,5], these data explain, at least in part, the observed growth and morphological defects of  $\Delta srbA$  during iron starvation.

#### ***srbA* mRNA abundance is regulated by iron availability, and *SrbA* positively affects iron acquisition and biosynthesis of heme and ergosterol**

In further support of *SrbA*'s role as a positive regulator of iron homeostasis, previous genome-wide transcriptome profiling experiments indicated that *srbA* transcript levels are reduced within 30–60 minutes during a shift from iron starvation to iron sufficiency independent of *SreA* and *HapX* [2,15]. Thus, we next confirmed that *srbA* transcript levels are substantially higher during iron starvation compared to iron sufficiency, and that *srbA* transcript levels are not influenced by inactivation of *SreA* or *HapX* (Figure 5). These results further support the hypothesis that *SrbA* transcript levels increase under low iron conditions and that this increase is independent of the known transcriptional regulators of iron homeostasis *SreA* and *HapX*.

Consistent with the transcriptome profile of  $\Delta srbA$  upon early exposure to hypoxia and biochemical analysis of siderophore production in the absence of *SrbA*, inactivation of *SrbA* reduced mRNA levels of genes involved in siderophore metabolism (siderophore biosynthetic *sidA*, TAFC-biosynthetic *sidF*, and siderophore importer-encoding *mirB*), reductive iron assimilation (*ftrA*), and iron transcriptional regulation (*hapX*) in iron limited conditions (Figure 5). All of these genes belong to the *SreA* regulon [15]. Moreover, *SrbA* deletion decreased the degree of derepression of these genes in  $\Delta sreA$  during iron sufficiency (compare  $\Delta sreA$  and  $\Delta srbA\Delta sreA$ ). The reduction of *hapX* mRNA levels in the absence of *SrbA* in iron limiting conditions suggests a previous unreported link between *SrbA* and *HapX* in iron limiting conditions. Together, these data support a role for *SrbA* in adaptation to iron starvation and demonstrate that *SrbA* impacts siderophore biosynthesis at the transcriptional level both in response to hypoxia and iron starvation through an unknown mechanism.

Importantly, mRNA levels of genes involved in ergosterol biosynthesis were also found to be more abundant under iron starvation conditions (Figure 5). Similar to the hypoxia mRNA transcriptome profiling data, this increase in mRNA levels is *SrbA*

dependent (Figure 5). In further support of *SrbA*'s role in regulating iron metabolism, mRNA levels of the iron center-ergosterol biosynthetic enzymes *Erg3* (C-5 sterol desaturase) and *Erg25* (C-4 methyl sterol oxidase) were independent of *SreA* and *HapX* (Figure 5). As mRNA levels from both *erg3* and *erg25* are also reduced in  $\Delta srbA$  in response to hypoxia, these data further support the *SrbA* mediated link between ergosterol biosynthesis and iron metabolism in response to hypoxia in *A. fumigatus*. Also of interest, *SrbA* inactivation decreased mRNA levels of the heme biosynthetic gene *hem13* (encoding coproporphyrinogen III oxidase) independent of *SreA* and *HapX* in iron limited and hypoxia conditions.

Importantly, mRNA levels of *acoA*, which encodes the iron-sulfur cluster-containing aconitase and whose expression is subject to *HapX*-mediated repression during iron starvation are decreased during iron-replete conditions in  $\Delta srbA$  and  $\Delta srbA\Delta hapX$  but not in  $\Delta srbA\Delta sreA$  [2]. These data indicate that *SrbA*-deficiency decreases cellular iron supply during iron-replete conditions due to reduction of iron uptake. Importantly, this defect can be partially suppressed by derepression of iron uptake via *SreA*-deficiency ( $\Delta srbA\Delta sreA$ ).

#### **Increased iron availability and/or inactivation of *SreA* increases resistance of $\Delta srbA$ to fluconazole and partially restores growth in hypoxia**

We next explored the hypothesis that the partial suppression of decreased cellular iron supply in  $\Delta srbA\Delta sreA$  would rescue the clinically relevant phenotypes of  $\Delta srbA$ : increased fluconazole susceptibility, inability to grow in hypoxia, and ability to cause invasive pulmonary aspergillosis. E-test mediated fluconazole susceptibility testing confirmed our previously published results that the inherent fluconazole resistance of *A. fumigatus* CEA10 depends on *SrbA* activity (Figure 6). Fluconazole susceptibility in  $\Delta srbA$  was consistent in both iron depleted and iron replete conditions. Intriguingly, high iron conditions were able to increase the resistance of  $\Delta srbA$  against fluconazole (high iron MIC = 12  $\mu$ g/ml compared to an MIC of 1  $\mu$ g/ml during iron replete or iron starvation). Additional deletion of *sreA*, but not *hapX*, in  $\Delta srbA$  partially rescued fluconazole resistance, and this effect, as expected, was potentiated under high iron conditions. Importantly, deletion of either *sreA* or *hapX* alone did not affect fluconazole susceptibility. Taken together, these results suggest that the increase in *A. fumigatus* fluconazole susceptibility in the absence of *SrbA* is partially due to loss of iron homeostasis.

The direct binding of *SrbA* to the promoter of *erg11A* (also called *cyp51A* in *A. fumigatus*) led us to explore the potential mechanism behind this result. We thus examined transcript levels of *erg11A*, *erg11B* (*cyp51B*), *erg25A*, and *srbA* in response to varying levels of iron in wild-type and  $\Delta srbA$ . Addition of high iron to either wild-type or  $\Delta srbA$  significantly increased *erg11A* transcript levels (Figure 7A and 7B). As expected from the ChIP experiment, this effect on *erg11A* transcript was *SrbA* dependent (Figure 7A and 7B). Of note, *erg11A* is not contained on the microarray and thus *erg11A* transcript levels were not previously observed to be *SrbA* dependent. Consistent with the previous Northern blot experiments, loss of iron stimulated an increase in *srbA* transcript levels (Figure 7A). However, the effect of iron on *erg25A* transcripts was minimal, though as observed with the microarray data, *erg25A* transcript levels are *SrbA* dependent (Figure 7A and 7B). Next, we examined total ergosterol levels in wild-type,  $\Delta srbA$ , and  $\Delta srbA\Delta sreA$  strains (Figure 7C). Addition of high iron was able to increase total ergosterol levels in the  $\Delta srbA$  and  $\Delta srbA\Delta sreA$  backgrounds consistent with the increase in *erg11A* transcript levels. No difference in ergosterol levels was observed between the

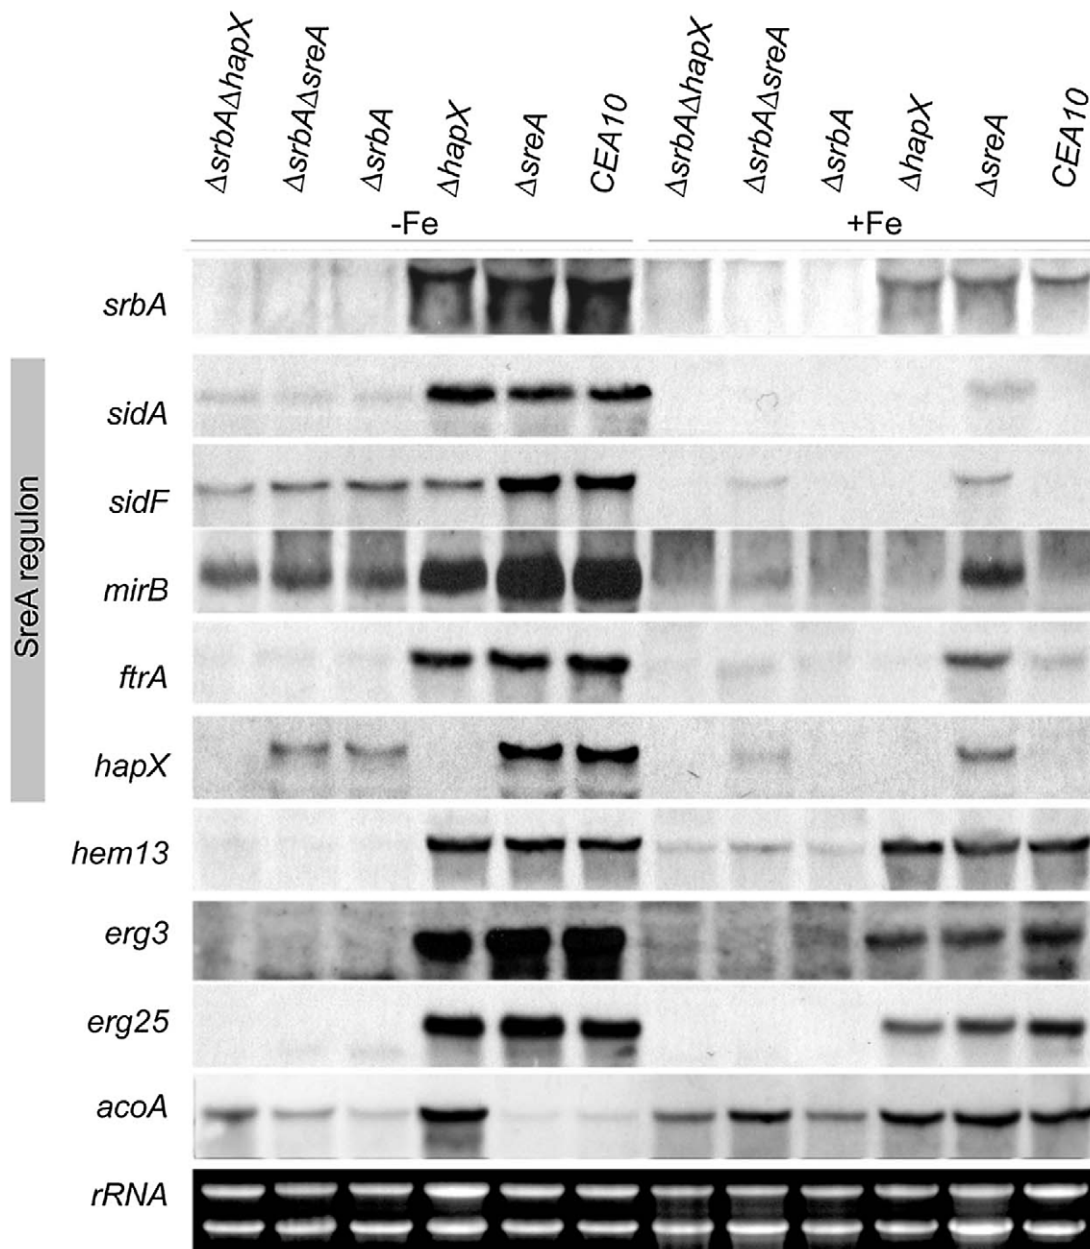

**Figure 5. *srbA* expression is transcriptionally upregulated by iron starvation and *SrbA*-deficiency downregulates the *SreA* regulon independent of *SreA* and *HapX*, as well as the ergosterol biosynthetic *erg3* and *erg25* and the heme-biosynthetic *hem13*.** For Northern analysis, total RNA was isolated from *A. fumigatus* strains grown for 24 h in liquid cultures at 37°C at 200 rpm during iron-replete (+Fe) and depleted (-Fe) conditions. Ethidium bromide-stained rRNA is shown as control for loading and quality of RNA.  
doi:10.1371/journal.pgen.1002374.g005

wild-type and  $\Delta sreA$  strains (Figure 7C). These data, however, do not rule out the potential for increased enzyme efficiency in the presence of more available iron, or a restoration of membrane fluidity due to increases in ergosterol level that may affect triazole drug uptake. However, these data suggest that loss of iron homeostasis due to absence of *SrbA* affects ergosterol biosynthesis and triazole drug interactions in *A. fumigatus*.

As high iron levels or deletion of *SreA* were able to partially rescue the fluconazole susceptibility and decrease in ergosterol content in  $\Delta srbA$ , we hypothesized that these effects may also rescue the hypoxia growth defect of  $\Delta srbA$ . In further support of a link between hypoxia adaptation and iron homeostasis in

*A. fumigatus*, supplementation of media with high iron concentrations plus inactivation of *SreA* partially rescues growth of  $\Delta srbA$  in hypoxia (Figure 8). This result can be explained by derepression of iron uptake due to *SreA* inactivation, which works best in the presence of high iron concentrations. Thus, in the absence of *SreA*, iron uptake is increased in  $\Delta srbA$ . *HapX*-deficiency had no effect on hypoxic growth and not surprisingly, is not transcriptionally induced in response to hypoxia. These data indicate that the hypoxic growth defect of  $\Delta srbA$  is at least partially explained by a defect in iron accumulation. In further support of this conclusion, susceptibility to cobalt chloride in the absence of *SrbA* is also rescued by further inactivation of



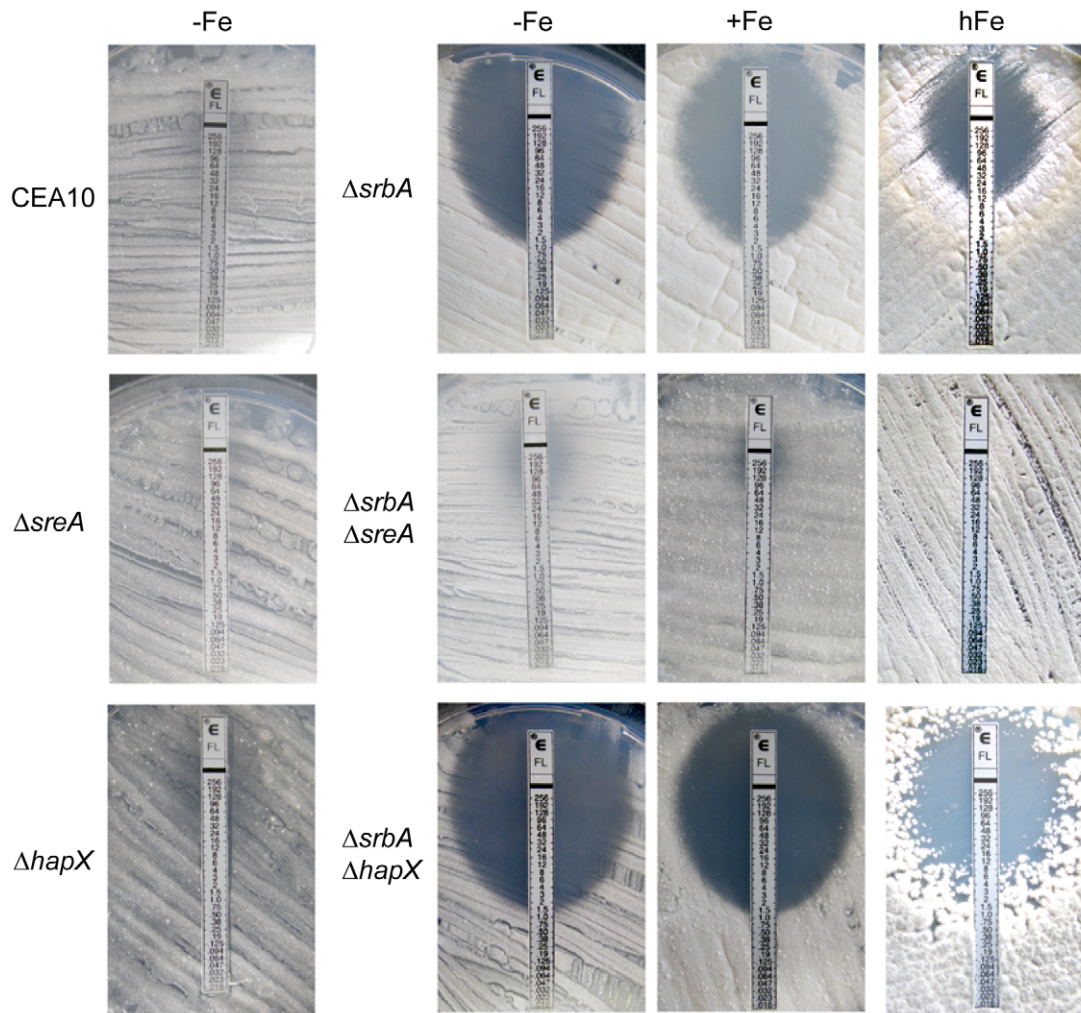

**Figure 6. Increased iron availability and/or inactivation of SreA increase resistance of  $\Delta srbA$  to fluconazole.** E-test strips (AB Biodisk, bioMérieux) impregnated with a gradient of fluconazole were placed onto a MM agar plates representing different iron availability (-Fe; +Fe, 30  $\mu\text{M}$ ; hFe, 10 mM iron) and containing a lawn of conidia. Growth inhibition was measured after 48 h at 37°C by direct observation. doi:10.1371/journal.pgen.1002374.g006

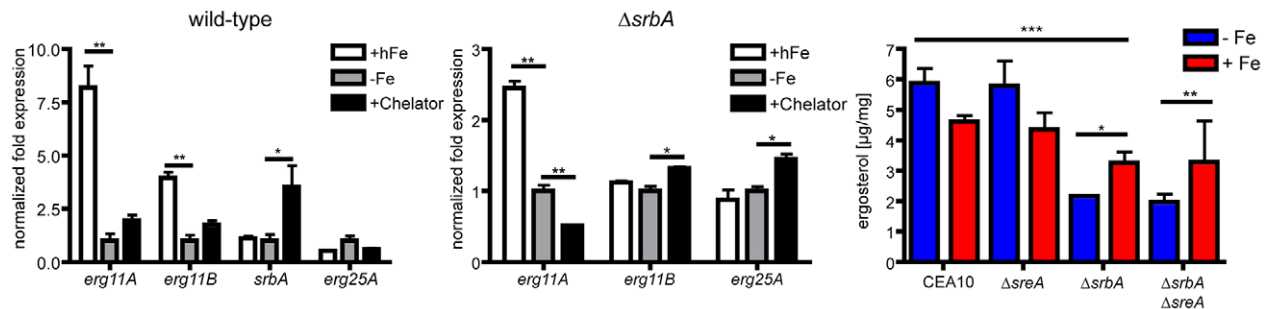

**Figure 7. Increased iron levels increase *erg11A* transcript and total ergosterol levels in the absence of SreA.** qRT-PCR analysis of *erg11A*, *erg11B*, *srbA*, and *erg25A* transcript levels were measured in the wild-type CEA10 (A) and  $\Delta srbA$  strains (B). Transcript levels were normalized to *tefA* transcript levels in each sample and data was normalized to the -Fe sample in both strains examined. Chelator = 100  $\mu\text{M}$  of the iron chelator 2,2-dipyridyl was added to the culture medium to completely remove free iron. Data represents the mean and standard deviation of three biological and two PCR technical replicates. (C) Total ergosterol content of respective strains in response to iron depleted and high iron conditions. Data represent the mean and standard deviation of 2 biological replicates. \*\*, \*\*\* =  $p < 0.05$ , two-tailed paired t-Test. \*\*\* refers to statistical comparisons between CEA10 in both Fe+ and Fe- to  $\Delta srbA$  in both Fe+ and Fe-. doi:10.1371/journal.pgen.1002374.g007

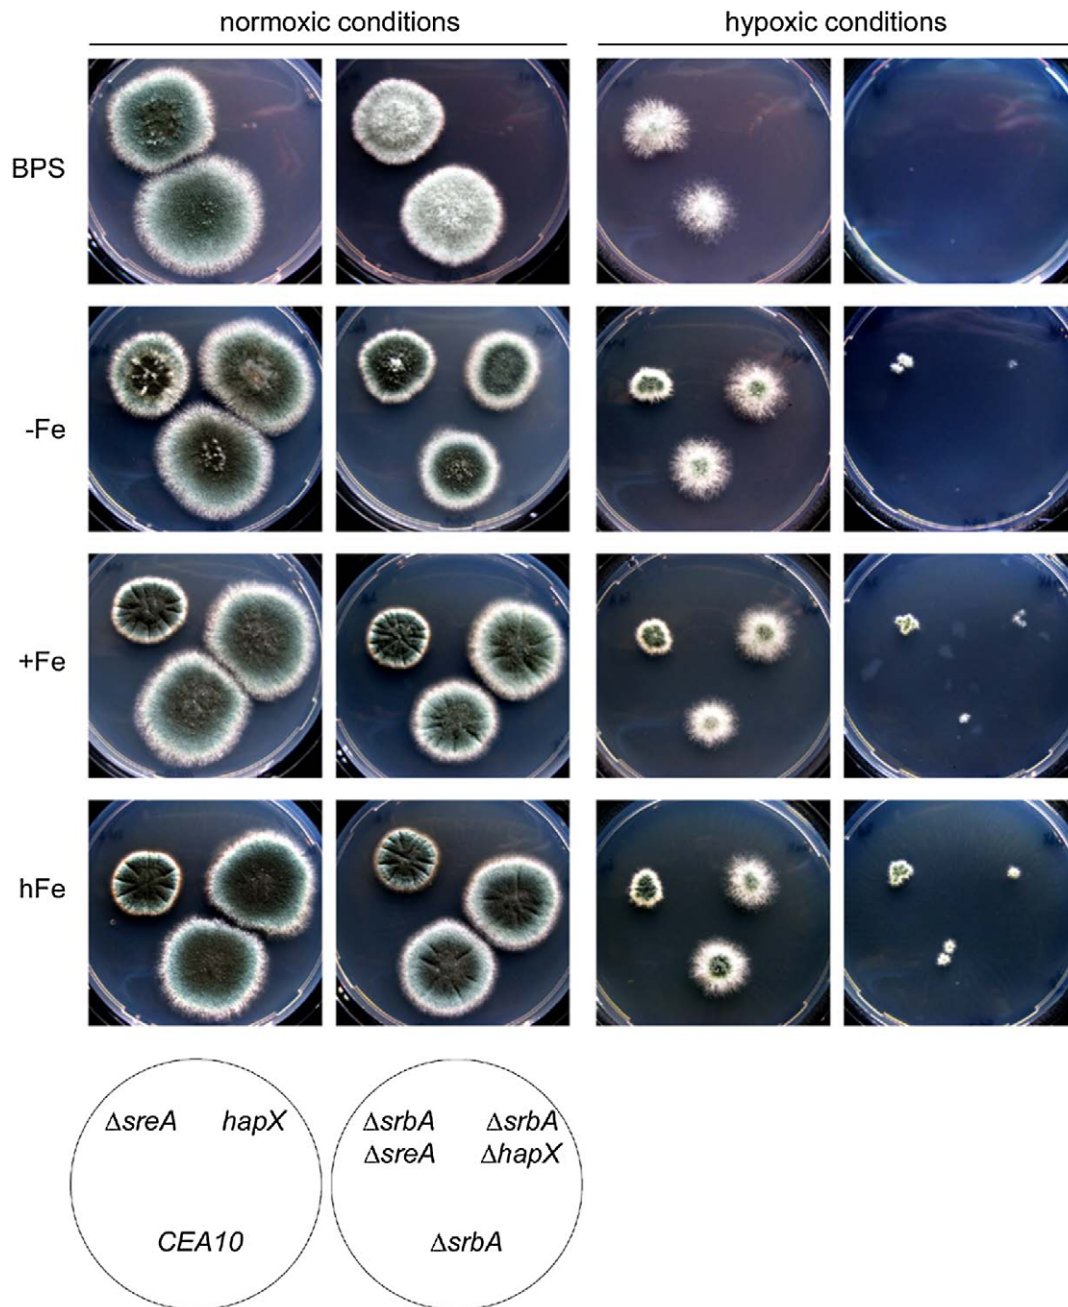

**Figure 8. Increased iron availability and/or inactivation of SreA improve growth of  $\Delta srbA$  during hypoxia.** For plate growth assays of CEA10,  $\Delta sreA$ ,  $\Delta hapX$ ,  $\Delta srbA$ ,  $\Delta srbA\Delta sreA$ , and  $\Delta srbA\Delta hapX$  under normoxic and hypoxic conditions, 100 conidia of each strain were point-inoculated on AMM agar plates containing different iron concentrations (–Fe; +Fe, 30  $\mu$ M; hFe, 1.5 mM) or the iron chelator BPS (–Fe, 100  $\mu$ M BPS) and incubated at 37°C for 96 h during hypoxic conditions or normoxic conditions.  
doi:10.1371/journal.pgen.1002374.g008

SreA (Figure S4). Thus, the ability of either high iron or loss of SreA activity to partially rescue the fluconazole and hypoxia phenotypes of  $\Delta srbA$  strongly suggests that  $\Delta srbA$  cells are iron deficient. These results further support an important link between iron homeostasis and ergosterol biosynthesis as mediated by SreA.

As the avirulence phenotype of  $\Delta srbA$  is hypothesized to at least partially be the result of its inability to grow in hypoxia, we next tested the ability of  $\Delta srbA\Delta sreA$  to cause disease in a chemotherapeutic murine model of invasive pulmonary aspergillosis. We

have previously shown that  $\Delta srbA$  is fully avirulent in this murine model of IPA; however, inactivation of SreA in  $\Delta srbA$  was not able to rescue virulence in the absence of SreA (Figure 9A). Histopathological examinations of wild-type,  $\Delta srbA$ , and  $\Delta srbA\Delta sreA$  strains revealed significant fungal growth and tissue necrosis in mice infected with CEA10 (Figure 9B). However, as previously reported, a significant reduction in  $\Delta srbA$  growth is observed *in vivo* and further inactivation of SreA did not visibly change the observed histopathology. As iron availability is extremely limited *in vivo*, and previous results demonstrating that *A. fumigatus*



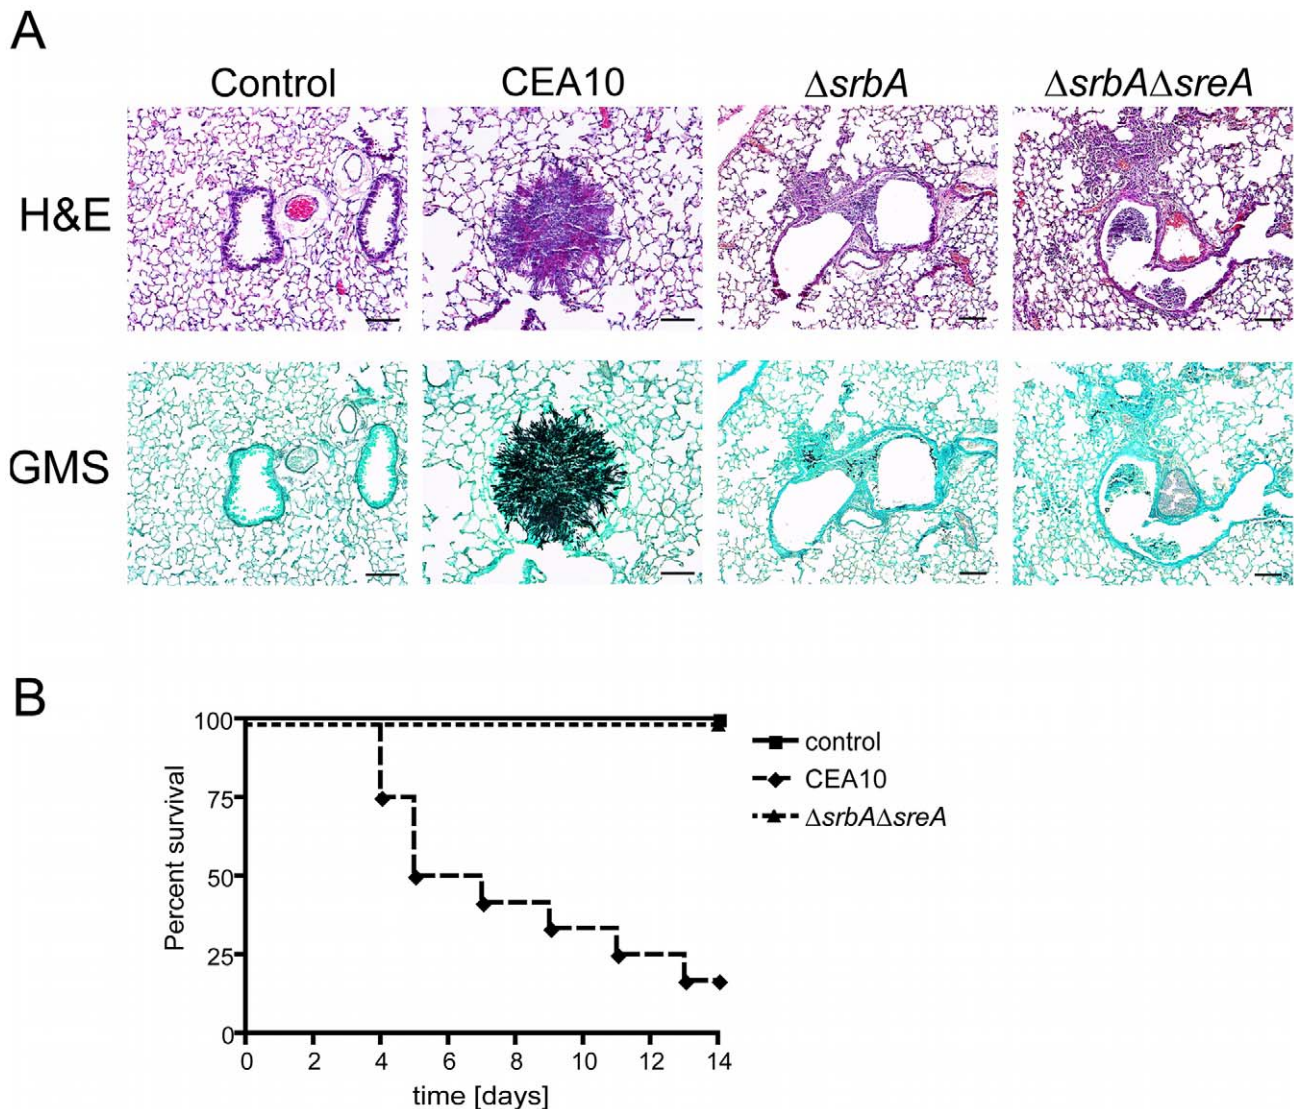

**Figure 9. Inactivation of SreA in  $\Delta srbA$  does not restore fungal virulence.** (A) Lung histopathology of CD1 mice infected with respective *A. fumigatus* strains on day +4 after infection. Substantial fungal growth and tissue necrosis are observed in lungs of mice infected with wild-type CEA10. However, little to no fungal growth is observed in lungs of mice infected with either  $\Delta srbA$ , or  $\Delta srbA\Delta sreA$ . (B) Kaplan-Meier survival analysis of respective *A. fumigatus* strains in chemotherapeutic model of invasive pulmonary aspergillosis. As with previously published results with strain  $\Delta srbA$ , strain  $\Delta srbA\Delta sreA$  has a significant reduction in virulence compared to wild-type CEA10 ( $P < 0.0001$ , Log-Rank Test for comparison between  $\Delta srbA\Delta sreA$  and wild-type CEA10). doi:10.1371/journal.pgen.1002374.g009

strains defective in siderophore biosynthesis have attenuated virulence, this result is likely not surprising and does not rule out a role for SreA mediated iron homeostasis in the avirulence phenotype of  $\Delta srbA$ . Additional experiments examining the impact of loss of iron homeostasis in  $\Delta srbA$  on *A. fumigatus* virulence are ongoing.

#### SrbA-deficiency alters the free amino acid pool composition in *A. fumigatus* during iron sufficiency and starvation

Iron starvation has previously been observed to cause a significant remodeling of the amino acid pool [2]. HapX, which is activated by iron-starvation, affects the amino acid composition during iron starvation but not during iron sufficiency and is crucial for coordination of the production of siderophores and their

precursor ornithine. Given SreA's role in mediating responses to low iron conditions and reduction of siderophore biosynthesis in the absence of SreA, we next tested the hypothesis that loss of SreA would also alter the amino acid pool of *A. fumigatus*. In support of this hypothesis, the transcriptome profile data suggest significant changes in the mRNA levels of genes involved in amino acid biosynthesis in the absence of SreA upon exposure to hypoxia (Figure 10). In contrast to HapX-deficiency, SreA-deficiency dramatically changed the composition of the amino acid pool during both iron-replete and depleted conditions (Table 2). Similar to HapX-deficiency, SreA-deficiency decreased the cellular ornithine pool during iron starvation, which indicates together with the decrease in siderophore biosynthesis, that SreA also plays a role in supply of the siderophore precursor ornithine. Thus, loss of siderophore biosynthesis in  $\Delta srbA$  may be due to regulation of critical precursor levels.

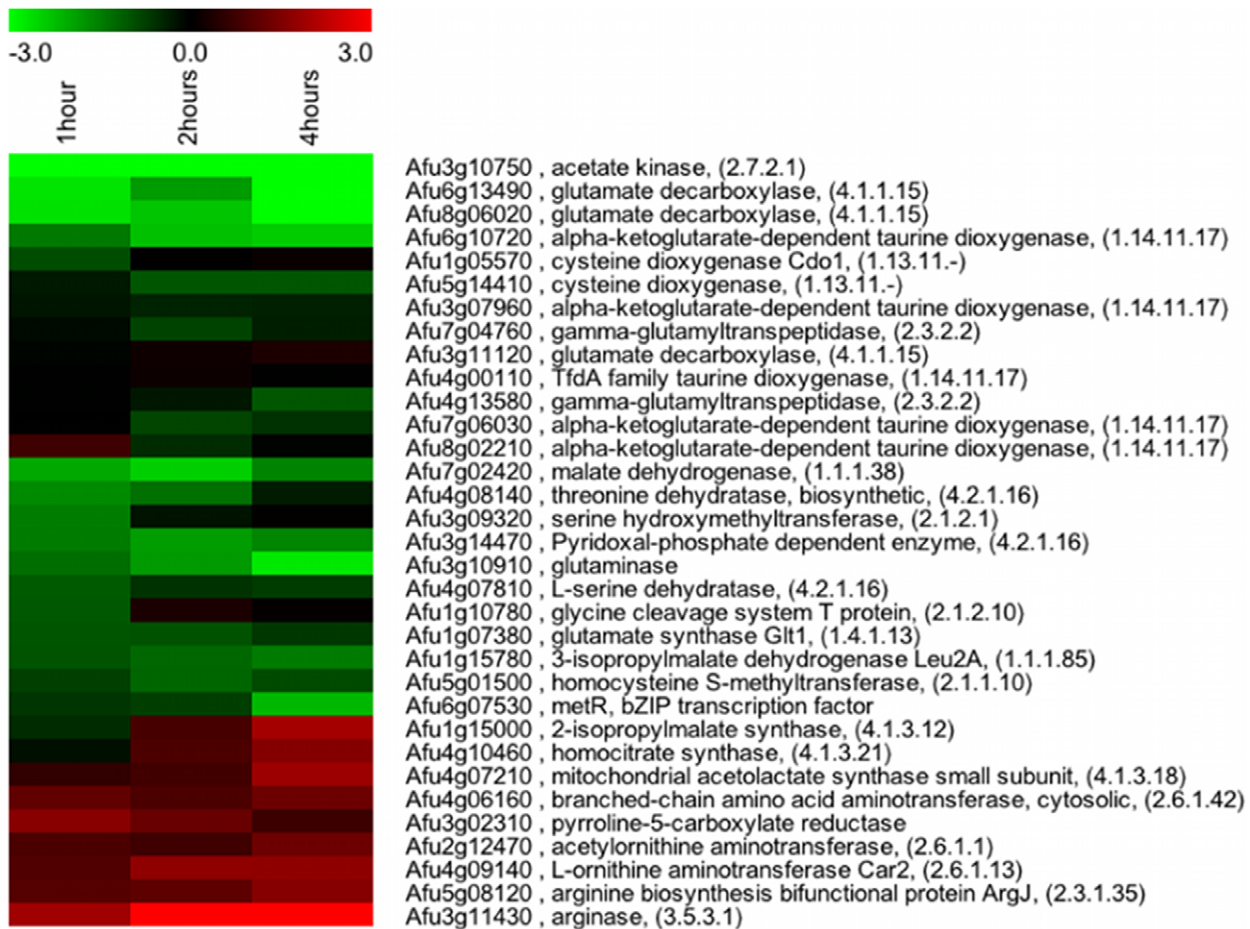

**Figure 10. Genes involved in amino acid biosynthetic processes are transcriptionally affected by loss of *SrbA* in hypoxia.** Heat map representation of genes involved in amino acid biosynthesis that are regulated by *A. fumigatus* *SrbA*. A detailed list of genes and fold changes is available in Tables S1, S2, S3, S4. Data compare wild-type *A. fumigatus* to the  $\Delta$ *srbA* strain at the indicated times after exposure to hypoxic conditions, such that wild-type transcript levels after one hour hypoxia exposure is compared to  $\Delta$ *srbA* after one hour. Red indicates transcript levels are higher in  $\Delta$ *srbA* (fold changes are log base 2). Three biological replicates each with dye flips were performed for each time point examined. doi:10.1371/journal.pgen.1002374.g010

## Discussion

Understanding the *in vivo* microenvironment conditions encountered by human pathogenic fungi is a promising line of inquiry for identifying novel therapeutic options for these frequently lethal infections. The importance of iron availability in host pathogen interactions is well established, and its role in invasive pulmonary aspergillosis is no exception. Previous studies have clearly demonstrated a critical role for iron acquisition mechanisms in fungal pathogenesis for *A. fumigatus* and other human pathogenic fungi [4,5,7,8,31,32,33,34,35,36,37,38,39,40]. More recently, it has been hypothesized that adaptation to low oxygen microenvironments during fungal infection may also be a critical virulence attribute of human pathogenic fungi [17,18,19,20,22]. Support for this hypothesis partially stems from studies with fungal SREBP null mutants in *C. neoformans* and *A. fumigatus* that are incapable of growth in hypoxia and unable to cause lethal disease in murine models of fungal infections [17,18,19,41,42]. However, as SREBPs are transcription factors that regulate a significant number of genes in fungi, it is unclear if the hypoxia growth phenotype of fungal SREBP null mutants is the primary factor for loss of virulence in these mutants. Moreover, fungal SREBP mutants display increased susceptibility to the triazole class of antifungal drugs.

Thus, several key questions remain regarding the role of *SrbA* in fungal pathogenesis. Important questions include what is the mechanism behind the inability of SREBP null mutants to grow in hypoxia? Does this directly correlate with the avirulence of fungal mutants that lack SREBPs? And what is the mechanism behind the increased susceptibility to triazole drugs in the absence of SREBP? To begin to answer these potentially clinically relevant questions, we utilized whole-genome transcriptome analysis of *A. fumigatus*  $\Delta$ *srbA* exposed to hypoxia to identify *SrbA* downstream effectors. Here, we report that the *A. fumigatus* SREBP is a key positive regulator of iron homeostasis, particularly with regard to iron acquisition, that is essential for adaptation to hypoxia and low iron microenvironments. Although previous transcriptome profiling experiments with the *C. neoformans* SREBP null mutant also suggest a potential role for fungal SREBPs in iron acquisition [7,17], here we definitively show that SREBP is required for adaptation to low iron conditions in *A. fumigatus*. We further observe that  $\Delta$ *srbA* cells are likely iron deficient and this partially explains the hypoxia growth and triazole susceptibility phenotypes of  $\Delta$ *srbA*. Importantly, *SrbA*'s effect on iron homeostasis appears to be primarily independent of the well-studied iron transcriptional regulatory factors HapX and SreA.

**Table 2.** Total free amino acid pool is altered in absence of SrbA.

| aa  | CEA10      |            |                    | $\Delta$ srbA |            |                   | $\Delta$ srbA/CEA10 |                   |
|-----|------------|------------|--------------------|---------------|------------|-------------------|---------------------|-------------------|
|     | +Fe        | -Fe        | -/+ Fe             | +Fe           | -Fe        | -/+ Fe            | +Fe                 | -Fe               |
| Ala | 37.64±0.32 | 9.41±2.74  | 0.25 <sup>d</sup>  | 18.14±0.73    | 5.73±1.64  | 0.32 <sup>d</sup> | 0.48 <sup>c</sup>   | 0.61 <sup>c</sup> |
| Arg | 1.71±0.24  | 16.32±0.52 | 9.57 <sup>b</sup>  | 2.77±0.74     | 12.59±1.41 | 4.55 <sup>b</sup> | 1.62 <sup>a</sup>   | 0.77              |
| Asn | 1.19±0.18  | 3.62±0.09  | 3.04 <sup>b</sup>  | 4.88±0.41     | 6.11±0.09  | 1.25              | 4.10 <sup>b</sup>   | 1.69 <sup>a</sup> |
| Asp | 4.31±0.32  | 3.15±1.07  | 0.73               | 7.52±1.01     | 5.37±1.01  | 0.71              | 1.75 <sup>a</sup>   | 1.71 <sup>a</sup> |
| Gln | 6.48±0.44  | 39.29±4.43 | 6.07 <sup>b</sup>  | 29.96±3.45    | 45.88±1.25 | 1.53 <sup>a</sup> | 4.63 <sup>b</sup>   | 1.17              |
| Glu | 40.89±0.82 | 9.1±2.18   | 0.22 <sup>d</sup>  | 29.01±2.29    | 12.07±2.61 | 0.42 <sup>c</sup> | 0.71                | 1.33              |
| Gly | 1.74±0.03  | 1.83±0.25  | 1.05               | 1.1±0.03      | 0.87±0.14  | 0.80              | 0.63 <sup>c</sup>   | 0.48 <sup>c</sup> |
| His | 0.28±0.03  | 2.29±0.38  | 8.06 <sup>b</sup>  | 0.49±0.43     | 2.15±0.64  | 4.39 <sup>b</sup> | 1.73 <sup>a</sup>   | 0.94              |
| Ile | 0.41±0.03  | 0.52±0.07  | 1.26               | 0.49±0.01     | 0.33±0.08  | 0.66 <sup>c</sup> | 1.20                | 0.63 <sup>c</sup> |
| Leu | 0.52±0.03  | 0.95±0.22  | 1.84 <sup>a</sup>  | 0.71±0.01     | 0.53±0.20  | 0.74              | 1.38                | 0.56 <sup>c</sup> |
| Lys | 1.86±0.14  | 5.52±0.45  | 2.96 <sup>a</sup>  | 1.44±0.03     | 4.24±0.36  | 2.94 <sup>a</sup> | 0.77                | 0.77              |
| Met | 0.07±0.00  | 0.25±0.01  | 3.45 <sup>b</sup>  | 0.18±0.03     | 0.21±0.03  | 1.20              | 2.41 <sup>a</sup>   | 0.84              |
| Orn | 0.49±0.02  | 4.96±0.06  | 10.03 <sup>b</sup> | 0.36±0.05     | 1.65±0.27  | 4.63 <sup>b</sup> | 0.72                | 0.33 <sup>d</sup> |
| Phe | 0.16±0.21  | 0.29±0.12  | 1.86 <sup>a</sup>  | 0.44±0.01     | 0.33±0.15  | 0.74              | 2.78 <sup>a</sup>   | 1.11              |
| Ser | 2.25±0.17  | 2.48±0.04  | 1.10               | 2.52±0.15     | 1.95±0.03  | 0.77              | 1.12                | 0.79              |

Individual amino acid pools (aa) are given in % of the total free amino acids ± STD. aa upregulated >1.5 and >3 fold in CEA10 or  $\Delta$ srbA during iron starvation compared to iron sufficiency are marked in <sup>a</sup> and <sup>b</sup>, respectively; aa pools down-regulated >1.5 and >3 fold are marked in <sup>c</sup> and <sup>d</sup> respectively. aa pools upregulated >1.5 and >3 fold in  $\Delta$ srbA compared to CEA10 in the same condition are marked in <sup>a</sup> and <sup>b</sup>, respectively; aa pools down-regulated >1.5 and >3 fold are marked in <sup>c</sup> and <sup>d</sup>, respectively.

doi:10.1371/journal.pgen.1002374.t002

SreA-deficiency in *A. fumigatus* and *A. nidulans* has been observed to partially derepress siderophore production and expression of respective genes involved in iron acquisition in iron replete conditions [15,43]. Importantly, this result strongly suggested the existence of additional regulatory mechanisms involved in iron homeostasis in *A. fumigatus*. Next, the transcription factor HapX was demonstrated to be required not only for repression of iron-consuming pathways but also for activation of siderophore biosynthesis and uptake during iron starvation in *A. nidulans* and *A. fumigatus* [2,44]. SreA and HapX are interconnected by a negative transcriptional feed back loop and simultaneous inactivation has been shown to be synthetically lethal in *A. nidulans* and *A. fumigatus* [2,44]. Recently, the transcription factor AcuM, that is required for gluconeogenesis, was found to also activate siderophore biosynthesis most likely via repression of SreA in *A. fumigatus* but not *A. nidulans* [16]. Here we present data that strongly suggest that SrbA is another critical activator of high-affinity iron acquisition systems in *A. fumigatus* including the siderophore system and reductive iron assimilation [45].

Figure 11 depicts a proposed model linking SreA, HapX, and SrbA in regulation of iron acquisition and ergosterol biosynthesis. Clearly, additional studies are needed to definitively define the relationship between these three important transcriptional regulators of iron homeostasis. Future studies will also seek to incorporate AcuM into our model. Importantly, in response to hypoxia, our microarray data did not detect transcript changes in either HapX or AcuM in the SrbA null mutant. However, in iron depleted conditions, HapX transcript was clearly reduced in  $\Delta$ srbA, which indicates that SrbA may directly or indirectly regulate HapX transcript levels under these conditions. Deletion of HapX in  $\Delta$ srbA did increase the magnitude of reduction in siderophore levels, further suggesting a possible link between these two transcription factors that remains to be fully elucidated.

Defining a regulatory role for SrbA in iron acquisition is consistent with previous reports in other organisms that have linked SREBPs with regulation of sterol biosynthesis and adaptation to hypoxia. Previous studies have suggested a tight link between iron, oxygen and ergosterol biosynthesis in response to hypoxia in yeast. For example, in the model yeast *S. cerevisiae*, low iron conditions decrease the activity of the C4-sterol demethylase Erg25, and moreover, sterol synthesis in this organism requires heme [46]. While *S. cerevisiae* lacks an SREBP ortholog, *S. pombe* and *C. neoformans* Sre1 and *A. fumigatus* SrbA SREBPs appear to be key regulators of Erg25 and sterol biosynthesis [19,30,47] (Figure 1B, Figure 2, and Figure 5). Our *A. fumigatus* hypoxia transcriptome profiling data are also in agreement with similar studies in *S. pombe* and *C. neoformans* that demonstrate an increase in transcripts associated with heme, sterol biosynthesis, and iron uptake in response to hypoxia [17,42,48]. A recent proteomic analysis of *A. fumigatus* grown in a chemostat culture under hypoxia demonstrated that the cellular contents of heme and iron substantially increase in these conditions [49]. Thus, taken together, our results here and the results of prior seminal studies in yeast establish a tight link between iron, oxygen, ergosterol biosynthesis and fungal responses to hypoxia, which are mediated in part by SREBPs.

Further support for this conclusion comes from our results demonstrating that addition of high iron concentrations to  $\Delta$ srbA, or derepression of iron uptake by simultaneous deletion of SreA, is able to partially rescue the triazole susceptibility and hypoxia growth phenotypes of this fungal SREBP null mutant. As a major goal of our study was to better understand the mechanisms behind the clinically relevant antifungal drug and virulence phenotypes of the SrbA null mutant, these results are particularly significant. An important question is how increased iron availability rescues these important  $\Delta$ srbA phenotypes. To this end, the observed increase in total ergosterol levels in  $\Delta$ srbA and



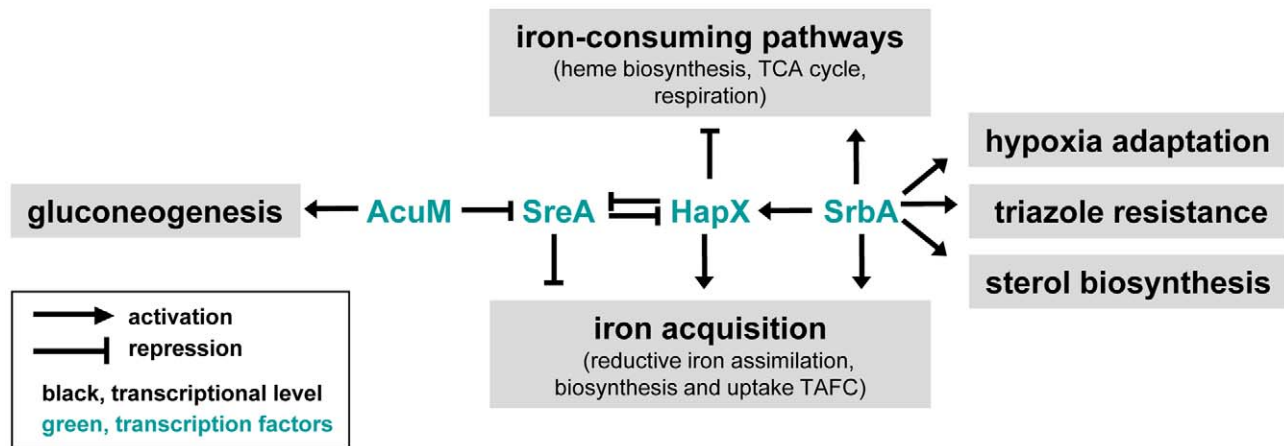

**Figure 11. Model for relationships between the transcriptional regulators Srba, SreA, HapX, and AcuM and their roles in iron acquisition and ergosterol biosynthesis.**  
doi:10.1371/journal.pgen.1002374.g011

$\Delta$ *srba* $\Delta$ *sreA* strains in high iron conditions suggest a direct SREBP mediated link between cellular iron levels and ergosterol biosynthesis. This was also reflected in the Srba dependent decrease in *erg11A* (*cyp51A*) transcript levels that could also be partially rescued by high iron. This result may explain, at least partially, the restoration of fluconazole resistance and hypoxia growth of  $\Delta$ *srba* under high iron conditions. It is important to note that *A. fumigatus* contains 2 functional  $14\alpha$ -demethylases (Erg11A/Cyp51A and Erg11B/Cyp51B) [50,51]. Loss of Erg11A but not Erg11B function results in increased fluconazole susceptibility. Moreover, intriguingly, it was recently observed that fluconazole preferentially binds Erg11B, thus likely explaining *A. fumigatus*'s inherent resistance to fluconazole [52].

In *Candida albicans*, a link between iron availability and fluconazole susceptibility has been suggested [53]. The authors observed a 30% reduction in ergosterol levels in low iron conditions and speculate that the increased fluconazole susceptibility in these conditions was due to a subsequent increase in membrane fluidity [53]. Thus, the partial rescue of fluconazole resistance in *A. fumigatus*  $\Delta$ *srba* by high iron may in part be due to a reduction of membrane fluidity. In support of this hypothesis, ergosterol levels in  $\Delta$ *srba* are approximately 50% less than wild-type, and increases in exogenous iron partially rescue this defect, which in theory could decrease membrane fluidity. How iron increases ergosterol levels is unknown, but it could be argued that the increased iron levels improve the efficiency of ergosterol biosynthetic enzymes whose levels appear to be reduced in the absence of Srba. Both Erg11A and Erg25 require iron as a co-factor for their enzymatic functions. Thus, the observed increases in *erg11A* transcript levels in the presence of high iron could be due to a positive feedback loop activated by an increase in sterol intermediates that result from increased enzyme efficiency.

With regard to the potential link between hypoxia growth and fungal virulence, high iron conditions or concomitant inactivation of SreA could partially rescue the hypoxia growth phenotype of  $\Delta$ *srba*, but not fungal virulence (Figure 9). Derepression of siderophore biosynthesis and iron uptake in  $\Delta$ *srba* was not dramatic enough to rescue the virulence defect of  $\Delta$ *srba* leaving the exact mechanism of Srba's role in fungal virulence undefined. However, given that iron is a major limiting micronutrient *in vivo*, and that the effect of high iron on  $\Delta$ *srba* growth was modest, this result is not surprising. As *A. fumigatus* mutants that lack siderophore biosynthesis also have attenuated

virulence *in vivo*, it seems clear that Srba's role in siderophore biosynthesis and iron uptake is at least partially related to the inability of  $\Delta$ *srba* to cause lethal disease. Attempts to fully restore hypoxia growth of  $\Delta$ *srba* via genetic manipulation of iron homeostasis and ergosterol biosynthesis pathways are currently underway.

In conclusion, our data suggest a new role for SREBPs in linking hypoxia adaptation, iron acquisition and ergosterol biosynthesis in fungi. We believe that untangling the web of Srba regulated effectors will lead to a better understanding of Srba's role in fungal pathogenesis and triazole drug susceptibility, which should provide a clearer picture regarding the potential of fungal SREBP modulation as a clinical therapeutic for human diseases caused by fungi. Thus, future studies will continue to seek to elucidate the genetic regulatory network mediated by Srba in *A. fumigatus* and its relationship to fungal virulence and triazole drug interactions. It might also be intriguing to determine the extent to which SREBPs in other eukaryotic organisms are involved in iron homeostasis mechanisms and how this potential regulation is linked with sterol biosynthesis homeostasis especially in hypoxic stress environments.

## Materials and Methods

### Fungal strains and growth conditions

*A. fumigatus* strains were grown at 37°C in *Aspergillus* minimal medium (AMM) according to Pontecorvo *et al.* [54] containing 1% glucose as carbon source and 20 mM glutamine as nitrogen source or glucose minimal medium (GMM) with 1% glucose as carbon source as previously described [19]. Iron-repleted media (+Fe) were supplemented with 30  $\mu$ M FeSO<sub>4</sub> and high iron media contained 1.5 mM, 3.0 mM, 5 mM or 10 mM FeSO<sub>4</sub>, respectively. Media used and concentrations of key elements are denoted according to the respective experiments. For iron depleted conditions (−Fe) addition of iron was omitted. For hypoxic conditions, 13.45 g Anerogen<sup>TM</sup> was used or an INVIVO<sub>2</sub> Hypoxia Chamber (Ruskin) set at 1% O<sub>2</sub>, 5% CO<sub>2</sub>, 94% N<sub>2</sub>. For liquid growth assays, 10<sup>8</sup> conidia were inoculated in 200 ml minimal medium.

### Transcriptome analysis

**Nucleic acid extraction.** Tissue was resuspended in 1 ml of Trizol reagent followed by a five minute incubation at RT. 0.2

volumes of chloroform was added, followed by a short vortex at low speed followed by 2 minute incubation at RT. Tubes were centrifuged at 16,000×g for 15 min at 4°C. The clear upper layer was pipeted into new tube and an equal volume of 80% EtOH was added. Samples were mixed well and applied to RNeasy spin column (Qiagen RNA kit) following manufacturer's instructions. RNA was eluted with 100 µL of RNase free water. Column incubated for one minute before centrifugation to elute maximum amount of RNA.

**cDNA preparation and probe labeling.** 10 µg of total RNA was used for cDNA synthesis using SuperScriptIII (Invitrogen), following the "Microbial RNA aminoallyl labeling for microarrays" (SOP# M007 Rev. 2) protocol detailed at <http://pfgrc.jcvi.org/index.php/microarray/protocols.html>. Briefly, samples were RNaseH treated and the cDNA concentration was checked on a Nanodrop 1000. cDNA was purified with Qiagen QIAquick PCR purification kit. Concentration was rechecked with Nanodrop and samples were dried completely with Eppendorf speed-vac. Pellet was resuspended with 4.5 µL of fresh 0.1 M Na<sub>2</sub>CO<sub>3</sub> buffer solution. 4.5 µL of Cy3 or Cy5 dye was added to appropriate tubes, and coupling was completed. Uncoupled dye was removed with NaOAc-modified QIAquick PCR cleanup. Dye ratio was calculated with Nanodrop. The two differentially labeled probes (Cy3 vs. Cy5) that were hybridized to the same microarray slide are mixed with equal cDNA volumes. The Cy3/Cy5 probe mixture was dried to completion in Eppendorf speed-vac. Resulting pellet was suspended in 10 µL of dH<sub>2</sub>O.

**Microarray hybridization.** Spotted arrays (*Aspergillus fumigatus* Af293, version 3) from the pathogen functional genomics resource center at JCVI were used for the entire experiment ([http://pfgrc.jcvi.org/index.php/microarray/array\\_description/aspergillus\\_fumigatus/version3.html](http://pfgrc.jcvi.org/index.php/microarray/array_description/aspergillus_fumigatus/version3.html)). The protocol "Microbial Hybridization of labeled probes" (SOP# M008 Rev 2.1) can be found at: <http://pfgrc.jcvi.org/index.php/microarray/protocols.html>. Briefly, the slides were soaked in sterile-filtered pre-hybridization solution (5×SSC, 1%BSA, 0.2%SDS) for two hours, washed and dried by centrifugation in mini slide spinner (LabNet) prior to hybridization. 45 µL of hybridization mixture (50% formamide, 5×SSC, 0.1%SDS, 0.001 M DTT) and 6 µL of salmon sperm DNA were added to probe. Lifter slip (Eric Scientific) was washed in 100% EtOH and dried. The slide and lifter slip were placed in hybridization chamber (Corning) and 60 µL of probe mixture was pipeted under lifter slip. Chambers were sealed and incubated in 42°C water bath for 18 hours. Slides were washed twice in low stringency buffer (2×SSC, 0.2% SDS, 0.02 M DTT), twice in medium stringency buffer (0.1× SSC, 0.1% SDS, 0.02 M DTT), twice in high stringency buffer (0.1× SSC, 0.02 M DTT), and a final wash with dH<sub>2</sub>O and 0.02 M DTT. Slides were dried completely in mini slide spinner.

**Image processing.** Slides were scanned with GenePix 4000B dual wavelength scanner (Axon Instruments, Molecular Devices Co.), adjusting PMT gain ratio to ~1.0, 100% laser power, and pixel size of 10. The resulting images were checked by eye for misaligned regions or false signals using GenePixPro 6.0 (Axon Instruments, Molecular Devices Co.). A GenePix report file was generated with raw data reads for each spot. These raw files are available at EMBL MIAMExpress website (<http://www.ebi.ac.uk/arrayexpress/>), accession number E-MEXP-3172.

**Data processing.** Data were processed using TM4 software and protocol recommendations for microarray analysis (<http://www.tm4.org/>). Briefly, GenePix files were converted to MeV files using ExpressConverter 2.1. MeV files were analyzed with MIDAS 2.21 to normalize data, according to the recommended

settings from TM4. Flip-dye pairs were read into MIDAS using a generous setting for one bad channel, and A and B channel flag check selected. LOWESS was used to minimize effect of intensity dependent bias, with default settings. Standard deviation regularization was used to minimize the effect of slide printing errors, with Cy3 as the reference. Flip-dye pairs were then checked for consistency and merged into a single MeV file. Biological replicates were then averaged to a single value for each gene and timepoint. This file is also available at MIAMExpress (<http://www.ebi.ac.uk/arrayexpress/>). Pathway analysis was then completed using gene set enrichment analysis (GSEA).

**Chromatin immunoprecipitation and ChIP-qPCR.** ChIP was performed after four hours exposure to hypoxia using methods in Kim *et al.* 2010 [55]. Briefly, cells were exposed to 1% formaldehyde to crosslink proteins to DNA, nuclei were isolated with nuclei isolation kit (Sigma) and then lysed and resulting DNA sonicated to 400–700 bp fragments. ChIP was performed with 1 µg of polyclonal antibody to SrbA (amino acids 1–275) on Protein A DynaMag beads (Invitrogen), in both wild-type and  $\Delta$ srbA strains. Negative control for ChIP was the IgG mouse antibody (Invitrogen). DNA quantity was assessed with Qubit 2.0 Fluorometer, using the high sensitivity dsDNA assay (Invitrogen). All ChIP samples were diluted 10 fold for PCR. 1 µl of template was used in a 10 µl total volume reaction using Promega 2× GoTaq qPCR master mix and 0.4 µM of each primer. Realtime PCR was performed with 40 cycles of 95°C for 15 s and 60°C for 30 s on Mastercycler ep *realplex* PCR machine. PCR was performed in duplicate for two separate ChIP experiments using primers designed for regions identified as enriched in preliminary ChIP-SEQ analysis (Barker et al. unpublished). Three genes were chosen from this analysis as positive for enrichment (*sit1*, *erg11A* and *erg25A*) and one was chosen as negative for enrichment (*sid4*). Percent input method was used to calculate the signal of enrichment of the promoter region for each gene (<http://cshprotocols.cshlp.org/cgi/content/full/2009/9/pdb.prot5279> and Invitrogen website). Briefly,  $100 \times (2^{-(\text{Input Ct} - \text{ChIP Ct})})$  was calculated for each reaction and the average and standard deviation calculated from these values. No correction for adjusted input was necessary as both templates were diluted equally prior to PCR. Oligonucleotides used for ChIP analysis are provided in Datasets S1 and S2.

**Quantitative real-time PCR.** qRT-PCR to measure transcript abundance was performed as we have previously described [56,57].

### Manipulation of nucleic acids and Northern analysis

Standard molecular techniques were performed using the pGEM-T vector system (Promega) and the bacterial strain *Escherichia coli* DH5 $\alpha$  cultivated in LB medium (1% bacto-tryptone, 0.5% yeast extract, 1% NaCl, pH 7.5) as we have previously described [2,15]. RNA was isolated using TRI reagent (Sigma-Aldrich). 10 µg of total RNA were used for electrophoresis on 1.2% agarose –2.2 M formaldehyde gels and blotted onto Hybond N membranes (Amersham Biosciences). Probes used in this study were generated by PCR with the digoxigenin labeling system (Roche Molecular Biochemicals); Oligonucleotides used for Northern analysis are provided in Dataset S3.

### Deletion of *hapX* and *sreA* in $\Delta$ srbA and CEA10

Deletion of *sreA* and *hapX* in CEA10 or  $\Delta$ srbA backgrounds was carried out as described previously for *A. fumigatus* ATCC46645 using the same deletion constructs [2,15].

Oligonucleotides used for deletions are provided in Dataset S4.

### Analysis of siderophore production and free amino acid pools

Isolation and analysis of extra- and intracellular siderophores from culture supernatants and cellular extracts, respectively, was carried out as described previously [58,59]. Quantification of free amino acid pools was carried out as described previously [60].

### Susceptibility testing to fluconazole and total ergosterol content measurements

E-test strips (AB bioMérieux), plastic strips impregnated with a gradient of fluconazole were used per manufacturers' instructions. Each strip was placed onto a AMM agar plate without iron or supplemented with 30  $\mu$ M or 10 mM  $\text{FeSO}_4$  containing a lawn of conidia of the respective strain and growth inhibition was measured after 24 and 48 h by direct observation of the plates at 37°C. No difference in results was observed between 24 and 48 hours. Total ergosterol content was measured as previously described [61]. Total ergosterol content results are the mean and standard deviation from 2 biological replicates with 6 total technical replicates for each strain.

### Murine virulence assay of invasive pulmonary aspergillosis

6 to 8 weeks old outbred CD-1 mice were immunosuppressed with intraperitoneal (i.p.) injections of cyclophosphamide at 150 mg/kg 2 days prior to inoculation and 40 mg/kg Kenalog injected subcutaneously (s.c.) 1 day prior to inoculation. Repeat injections were given on day 3 post inoculation with cyclophosphamide (150 mg/kg i.p.) and on day 6 post inoculation with Kenalog (40 mg/kg s.c.). Mice were housed six per cage and had access to food and water ad libitum. Twelve mice per *A. fumigatus* strain (CEA10 and  $\Delta$ *srbA* $\Delta$ *sreA*) were inoculated intranasally with  $1 \times 10^6$  conidia/40  $\mu$ l following brief isofluorane inhalation. Mock control mice were inoculated with sterile 0.01% Tween 80. Mice were monitored twice daily over a time period of 14 days. Any animals showing distress were immediately sacrificed and recorded as deaths within 24 hrs. No mock infected animals perished during the time course of the experiment. All experiments were approved by the Montana State University IACUC and adhere to NIH policies on animal welfare.

### Ethics statement

This study was carried out in strict accordance with the recommendations in the Guide for the Care and Use of Laboratory Animals of the National Institutes of Health. The animal experimental protocol was approved by the Institutional Animal Care and Use Committee (IACUC) at Montana State University (Federal-Wide Assurance Number: A3637-01).

### Histopathology

For histopathology, five CD-1 mice per *A. fumigatus* strain (CEA10,  $\Delta$ *srbA*,  $\Delta$ *srbA* $\Delta$ *sreA*) were immunosuppressed and inoculated as described above. On day 4 post *A. fumigatus* challenge, mice were sacrificed by pentobarbital anesthesia (100  $\mu$ g/g body weight) followed by exsanguinations. Lungs were removed immediately, fixed in 10% phosphate-buffered formalin, embedded in paraffin, sectioned at 5  $\mu$ m, and stained with hematoxylin, and eosin (H&E) or Gomori methenamine silver (GMS) by using standard histological techniques. Microscopic examinations were performed on a Nikon Eclipse 80i microscope and imaging system (Nikon Instruments Inc., Melville, NY, USA).

## Supporting Information

**Figure S1** Gene set enrichment analysis for gene ontology molecular function. Heat map representing the results of the gene set enrichment analysis on the gene ontology term molecular function from the wild-type and  $\Delta$ *srbA* hypoxia microarray experiment. The upper left of each square depicts upregulated mRNAs (those expressed higher in  $\Delta$ *srbA*) while the lower right of each square represents downregulated mRNAs (those expressed higher in the wild-type). Color denotes the level of significance as depicted in the bar above the GO terms. The more yellow the square, the more significant the association with that GO term. (TIF)

**Figure S2** Gene set enrichment analysis for gene ontology Cellular Component. Heat map representing the results of the gene set enrichment analysis on the gene ontology term Cellular Component from the wild-type and  $\Delta$ *srbA* hypoxia microarray experiment. The upper left of each square depicts upregulated mRNAs (those expressed higher in  $\Delta$ *srbA*) while the lower right of each square represents downregulated mRNAs (those expressed higher in the wild-type). Color denotes the level of significance as depicted in the bar above the GO terms. The more yellow the square, the more significant the association with that GO term. (TIF)

**Figure S3** Gene set enrichment analysis for gene ontology biological process. Heat map representing the results of the gene set enrichment analysis on the gene ontology term biological process from the wild-type and  $\Delta$ *srbA* hypoxia microarray experiment. The upper left of each square depicts upregulated mRNAs (those expressed higher in  $\Delta$ *srbA*) while the lower right of each square represents downregulated mRNAs (those expressed higher in the wild-type). Color denotes the level of significance as depicted in the bar above the GO terms. The more yellow the square, the more significant the association with that GO term. (TIF)

**Figure S4** Increased iron availability and/or inactivation of SreA improve resistance of  $\Delta$ *srbA* against cobalt chloride.  $10^3$  conidia of each strain were point-inoculated on AMM agar plates containing different iron concentrations (–Fe; +Fe, 30  $\mu$ M; hFe, 1.5 mM; hhFe, 3.0 mM) or the iron chelator BPS (–Fe, 100  $\mu$ M BPS) in the presence or absence of 0.6 mM  $\text{CoCl}_2$  and incubated for 48 h at 37°C. (TIF)

**Table S1** Microarray results,  $\text{Log}_2$  ratios and fold changes for mRNAs downregulated in  $\Delta$ *srbA* at 1 hour post exposure to hypoxia. (XLS)

**Table S2** Microarray results,  $\text{Log}_2$  ratios and fold changes for mRNAs upregulated in  $\Delta$ *srbA* at 1 hour post exposure to hypoxia. (XLS)

**Table S3** Microarray results,  $\text{Log}_2$  ratios and fold changes for mRNAs downregulated in  $\Delta$ *srbA* at 2 hours post exposure to hypoxia. (XLS)

**Table S4** Microarray results,  $\text{Log}_2$  ratios and fold changes for mRNAs upregulated in  $\Delta$ *srbA* at 2 hours post exposure to hypoxia. (XLS)

**Table S5** Microarray results,  $\text{Log}_2$  ratios and fold changes for mRNAs downregulated in  $\Delta$ *srbA* at 4 hours post exposure to hypoxia. (XLS)

**Table S6** Microarray results, Log<sub>2</sub> ratios and fold changes for mRNAs upregulated in *ΔsrbA* at 4 hours post exposure to hypoxia. (XLS)

**Table S7** P-values for Gene set enrichment analysis of gene expression data for gene ontology molecular function. (XLS)

**Table S8** P-values for Gene set enrichment analysis of gene expression data for gene ontology cellular component. (XLS)

**Table S9** P-values for Gene set enrichment analysis of gene expression data for gene ontology biological process. (XLS)

**Dataset S1** Oligonucleotides used in this study for ChIP promoter enrichment. (DOCX)

**Dataset S2** Oligonucleotides sequences used in Realtime RT-PCR. (DOCX)

**Dataset S3** Oligonucleotides used in this study for Northern-blot probes. (DOCX)

**Dataset S4** Oligonucleotides used for generation of deletion strains. (DOCX)

## Acknowledgments

We are grateful to Cornelia Lass-Flörl (Division of Hygiene and Medical Microbiology, Innsbruck Medical University) for kindly providing E-test strips and Srismbat Puttikamonkul (Montana State University) for assistance with animal model work. Thank you to Dr. Thomas Mitchell and Dr. Kengo Morohashi (Ohio State University) for assistance with the chromatin immunoprecipitation protocol and Dr. Laura Alcazar-Fuoli (Imperial College) for ergosterol extraction protocol.

## Author Contributions

Conceived and designed the experiments: HH RAC. Performed the experiments: MB BMB SDW NB SJB EJC AM NG HH RAC. Analyzed the data: MB BMB SDW NB SJB EJC AM NG HH RAC. Contributed reagents/materials/analysis tools: AM. Wrote the paper: MB BMB HH RAC.

## References

- Kornitzer D (2009) Fungal mechanisms for host iron acquisition. *Current opinion in microbiology* 12: 377–383.
- Schrettl M, Beckmann N, Varga J, Heinekamp T, Jacobsen ID, et al. (2010) HapX-mediated adaption to iron starvation is crucial for virulence of *Aspergillus fumigatus*. *PLoS Pathog* 6: e1001124. doi:10.1371/journal.ppat.1001124.
- Schrettl M, Ibrahim-Granet O, Droin S, Huerre M, Latge JP, et al. (2010) The crucial role of the *Aspergillus fumigatus* siderophore system in interaction with alveolar macrophages. *Microbes and infection/Institut Pasteur* 12: 1035–1041.
- Schrettl M, Bignell E, Kragl C, Sabiha Y, Loss O, et al. (2007) Distinct roles for intra- and extracellular siderophores during *Aspergillus fumigatus* infection. *PLoS Pathog* 3: e128. doi:10.1371/journal.ppat.0030128.
- Schrettl M, Bignell E, Kragl C, Joehchl C, Rogers T, et al. (2004) Siderophore biosynthesis but not reductive iron assimilation is essential for *Aspergillus fumigatus* virulence. *The Journal of experimental medicine* 200: 1213–1219.
- Hissen AH, Chow JM, Pinto LJ, Moore MM (2004) Survival of *Aspergillus fumigatus* in serum involves removal of iron from transferrin: the role of siderophores. *Infection and immunity* 72: 1402–1408.
- Jung WH, Kronstad JW (2008) Iron and fungal pathogenesis: a case study with *Cryptococcus neoformans*. *Cellular microbiology* 10: 277–284.
- Jung WH, Sham A, White R, Kronstad JW (2006) Iron regulation of the major virulence factors in the AIDS-associated pathogen *Cryptococcus neoformans*. *PLoS Biol* 4: e410. doi:10.1371/journal.pbio.0040410.
- Mendel GA (1961) Studies on iron absorption. I. The relationships between the rate of erythropoiesis, hypoxia and iron absorption. *Blood* 18: 727–736.
- Rolf A, Kvietikova I, Gassmann M, Wenger RH (1997) Oxygen-regulated transferrin expression is mediated by hypoxia-inducible factor-1. *The Journal of biological chemistry* 272: 20055–20062.
- Mukhopadhyay CK, Mazumder B, Fox PL (2000) Role of hypoxia-inducible factor-1 in transcriptional activation of ceruloplasmin by iron deficiency. *The Journal of biological chemistry* 275: 21048–21054.
- Lee PJ, Jiang BH, Chin BY, Iyer NV, Alam J, et al. (1997) Hypoxia-inducible factor-1 mediates transcriptional activation of the heme oxygenase-1 gene in response to hypoxia. *The Journal of biological chemistry* 272: 5375–5381.
- Yoon D, Pastore YD, Divoky V, Liu E, Mlodnicka AE, et al. (2006) Hypoxia-inducible factor-1 deficiency results in dysregulated erythropoiesis signaling and iron homeostasis in mouse development. *The Journal of biological chemistry* 281: 25703–25711.
- Peyssonnaud C, Nizet V, Johnson RS (2008) Role of the hypoxia inducible factors HIF in iron metabolism. *Cell cycle* 7: 28–32.
- Schrettl M, Kim HS, Eisendle M, Kragl C, Niernan WC, et al. (2008) SreA-mediated iron regulation in *Aspergillus fumigatus*. *Molecular microbiology* 70: 27–43.
- Liu H, Gravelat FN, Chiang LY, Chen D, Vanier G, et al. (2010) *Aspergillus fumigatus* AcuM regulates both iron acquisition and gluconogenesis. *Molecular microbiology* 78: 1038–1054.
- Chang YC, Bien CM, Lee H, Espenshade PJ, Kwon-Chung KJ (2007) Sre1p, a regulator of oxygen sensing and sterol homeostasis, is required for virulence in *Cryptococcus neoformans*. *Mol Microbiol* 64: 614–629.
- Chun CD, Liu OW, Madhani HD (2007) A Link between virulence and homeostatic responses to hypoxia during infection by the human fungal pathogen *Cryptococcus neoformans*. *PLoS Pathog* 3: e22. doi:10.1371/journal.ppat.0030022.
- Willger SD, Puttikamonkul S, Kim KH, Burritt JB, Grahl N, et al. (2008) A sterol-regulatory element binding protein is required for cell polarity, hypoxia adaptation, azole drug resistance, and virulence in *Aspergillus fumigatus*. *PLoS Pathog* 4: e1000200. doi:10.1371/journal.ppat.1000200.
- Grahl N, Cramer RA, Jr. (2009) Regulation of hypoxia adaptation: an overlooked virulence attribute of pathogenic fungi? *Med Mycol*. pp 1–16.
- Wezensky SJ, Cramer RA (2010) Implications of hypoxic microenvironments during invasive aspergillosis. *Med Mycol*.
- Ernst JF, Tielker D (2009) Responses to hypoxia in fungal pathogens. *Cellular microbiology* 11: 183–190.
- Espenshade PJ (2006) SREBPs: sterol-regulated transcription factors. *Journal of cell science* 119: 973–976.
- Rawson RB (2003) Control of lipid metabolism by regulated intramembrane proteolysis of sterol regulatory element binding proteins (SREBPs). *Biochem Soc Symp*. pp 221–231.
- Rawson RB (2003) The SREBP pathway—insights from Insigns and insects. *Nat Rev Mol Cell Biol* 4: 631–640.
- Nomura T, Horikawa M, Shimamura S, Hashimoto T, Sakamoto K (2010) Fat accumulation in *Caenorhabditis elegans* is mediated by SREBP homolog SBP-1. *Genes & nutrition* 5: 17–27.
- Tontonoz P, Kim JB, Graves RA, Spiegelman BM (1993) ADD1: a novel helix-loop-helix transcription factor associated with adipocyte determination and differentiation. *Molecular and cellular biology* 13: 4753–4759.
- Yokoyama C, Wang X, Briggs MR, Admon A, Wu J, et al. (1993) SREBP-1, a basic-helix-loop-helix-leucine zipper protein that controls transcription of the low density lipoprotein receptor gene. *Cell* 75: 187–197.
- Todd BL, Stewart EV, Burg JS, Hughes AL, Espenshade PJ (2006) Sterol regulatory element binding protein is a principal regulator of anaerobic gene expression in fission yeast. *Mol Cell Biol* 26: 2817–2831.
- Hughes AL, Todd BL, Espenshade PJ (2005) SREBP pathway responds to sterols and functions as an oxygen sensor in fission yeast. *Cell* 120: 831–842.
- Lian T, Simmer MI, D'Souza CA, Steen BR, Zuyderduyn SD, et al. (2005) Iron-regulated transcription and capsule formation in the fungal pathogen *Cryptococcus neoformans*. *Molecular microbiology* 55: 1452–1472.
- Jung WH, Sham A, Lian T, Singh A, Kosman DJ, et al. (2008) Iron source preference and regulation of iron uptake in *Cryptococcus neoformans*. *PLoS Pathog* 4: e45. doi:10.1371/journal.ppat.0040045.
- Jung WH, Saikia S, Hu G, Wang J, Fung CK, et al. (2010) HapX positively and negatively regulates the transcriptional response to iron deprivation in *Cryptococcus neoformans*. *PLoS Pathog* 6: e1001209. doi:10.1371/journal.ppat.1001209.
- Almeida RS, Wilson D, Hube B (2009) *Candida albicans* iron acquisition within the host. *FEMS yeast research* 9: 1000–1012.
- Heymann P, Gerads M, Schaller M, Dromer F, Winkelmann G, et al. (2002) The siderophore iron transporter of *Candida albicans* (Sit1p/Arn1p) mediates uptake of ferrichrome-type siderophores and is required for epithelial invasion. *Infection and immunity* 70: 5246–5255.
- Ramanan N, Wang Y (2000) A high-affinity iron permease essential for *Candida albicans* virulence. *Science* 288: 1062–1064.

37. Sweet SP, Douglas IJ (1991) Effect of iron deprivation on surface composition and virulence determinants of *Candida albicans*. *Journal of general microbiology* 137: 859–865.
38. Tattersall P (1990) Iron deficiency and candida infection. *The Practitioner* 234: 326.
39. Kirkpatrick CH, Green I, Rich RR, Schade AL (1971) Inhibition of growth of *Candida albicans* by iron-unsaturated lactoferrin: relation to host-defense mechanisms in chronic mucocutaneous candidiasis. *The Journal of infectious diseases* 124: 539–544.
40. Esterly NB, Brammer SR, Crounse RG (1967) The relationship of transferrin and iron to serum inhibition of *Candida albicans*. *The Journal of investigative dermatology* 49: 437–442.
41. Bien CM, Chang YC, Nes WD, Kwon-Chung KJ, Espenshade PJ (2009) *Cryptococcus neoformans* Site-2 protease is required for virulence and survival in the presence of azole drugs. *Molecular microbiology* 74: 672–690.
42. Chun CD, Liu OW, Madhani HD (2007) A link between virulence and homeostatic responses to hypoxia during infection by the human fungal pathogen *Cryptococcus neoformans*. *PLoS Pathog* 3: e22. doi:10.1371/journal.ppat.0030022.
43. Haas H, Zadra I, Stoffer G, Angermayr K (1999) The *Aspergillus nidulans* GATA factor SREA is involved in regulation of siderophore biosynthesis and control of iron uptake. *The Journal of biological chemistry* 274: 4613–4619.
44. Hortschansky P, Eisendle M, Al-Abdallah Q, Schmidt AD, Bergmann S, et al. (2007) Interaction of HapX with the CCAAT-binding complex—a novel mechanism of gene regulation by iron. *The EMBO journal* 26: 3157–3168.
45. Wallner A, Blatzer M, Schrettl M, Sarg B, Lindner H, et al. (2009) Ferricrocin, a siderophore involved in intra- and transcellular iron distribution in *Aspergillus fumigatus*. *Applied and environmental microbiology* 75: 4194–4196.
46. Kaplan J, McVey Ward D, Crisp RJ, Philpott CC (2006) Iron-dependent metabolic remodeling in *S. cerevisiae*. *Biochimica et biophysica acta* 1763: 646–651.
47. Hughes AL, Lee CY, Bien CM, Espenshade PJ (2007) 4-Methyl sterols regulate fission yeast SREBP-Scap under low oxygen and cell stress. *J Biol Chem* 282: 24388–24396.
48. Todd BL, Stewart EV, Burg JS, Hughes AL, Espenshade PJ (2006) Sterol regulatory element binding protein is a principal regulator of anaerobic gene expression in fission yeast. *Molecular and cellular biology* 26: 2817–2831.
49. Vodisch M, Scherlach K, Winkler R, Hertweck C, Braun HP, et al. (2011) Analysis of the *Aspergillus fumigatus* Proteome Reveals Metabolic Changes and the Activation of the Pseurotin A Biosynthesis Gene Cluster in Response to Hypoxia. *Journal of proteome research*.
50. Mellado E, Diaz-Guerra TM, Cuenca-Estrella M, Rodriguez-Tudela JL (2001) Identification of two different 14-alpha sterol demethylase-related genes (*cyp51A* and *cyp51B*) in *Aspergillus fumigatus* and other *Aspergillus* species. *Journal of clinical microbiology* 39: 2431–2438.
51. Mellado E, Garcia-Effron G, Buitrago MJ, Alcazar-Fuoli L, Cuenca-Estrella M, et al. (2005) Targeted gene disruption of the 14-alpha sterol demethylase (*cyp51A*) in *Aspergillus fumigatus* and its role in azole drug susceptibility. *Antimicrobial agents and chemotherapy* 49: 2536–2538.
52. Warrilow AG, Melo N, Martel CM, Parker JE, Nes WD, et al. (2010) Expression, purification, and characterization of *Aspergillus fumigatus* sterol 14-alpha demethylase (CYP51) isoenzymes A and B. *Antimicrobial agents and chemotherapy* 54: 4225–4234.
53. Prasad T, Chandra A, Mukhopadhyay CK, Prasad R (2006) Unexpected link between iron and drug resistance of *Candida spp.*: iron depletion enhances membrane fluidity and drug diffusion, leading to drug-susceptible cells. *Antimicrobial agents and chemotherapy* 50: 3597–3606.
54. Pontecorvo G, Roper JA, Hemmons LM, Macdonald KD, Bufton AW (1953) The genetics of *Aspergillus nidulans*. *Adv Genet* 5: 141–238.
55. Kim S, Hu J, Oh Y, Park J, Choi J, et al. (2010) Combining ChIP-chip and expression profiling to model the MoCRZ1 mediated circuit for Ca/calineurin signaling in the rice blast fungus. *PLoS Pathog* 6: e1000909. doi:10.1371/journal.ppat.1000909.
56. Grahl N, Puttikamonkul S, Macdonald JM, Gamcsik MP, Ngo LY, et al. (2011) *In vivo* hypoxia and a fungal alcohol dehydrogenase influence the pathogenesis of invasive pulmonary aspergillosis. *PLoS Pathog* 7: e1002145. doi:10.1371/journal.ppat.1002145.
57. Puttikamonkul S, Willger SD, Grahl N, Perfect JR, Movahed N, et al. (2010) Trehalose 6-phosphate phosphatase is required for cell wall integrity and fungal virulence but not trehalose biosynthesis in the human fungal pathogen *Aspergillus fumigatus*. *Mol Microbiol* 77: 891–911.
58. Oberegger H, Schoeser M, Zadra I, Abt B, Haas H (2001) SREA is involved in regulation of siderophore biosynthesis, utilization and uptake in *Aspergillus nidulans*. *Molecular microbiology* 41: 1077–1089.
59. Konetschny-Rapp S, Huschka HG, Winkelmann G, Jung G (1988) High-performance liquid chromatography of siderophores from fungi. *Biology of metals* 1: 9–17.
60. Berger H, Basheer A, Bock S, Reyes-Dominguez Y, Dalik T, et al. (2008) Dissecting individual steps of nitrogen transcription factor cooperation in the *Aspergillus nidulans* nitrate cluster. *Molecular microbiology* 69: 1385–1398.
61. Alcazar-Fuoli L, Mellado E, Garcia-Effron G, Lopez JF, Grimalt JO, et al. (2008) Ergosterol biosynthesis pathway in *Aspergillus fumigatus*. *Steroids* 73: 339–347.
