# Supplementary material for: SREBP Coordinates Iron and Ergosterol Homeostasis to Mediate Triazole Drug and Hypoxia Responses in the Human Fungal Pathogen Aspergillus fumigatus
Source: PLoS Genet. 2011 Dec 1;7(12):e1002374. doi: 10.1371/journal.pgen.1002374 (PMC3228822; doi:10.1371/journal.pgen.1002374)
Supplement: Table S6 — Microarray results, Log2 ratios and fold changes for mRNAs upregulated in ΔsrbA at 4 hours post exposure to hypoxia. (XLS) [file pgen.1002374.s010.xls]

## Sheet: Sheet1
Gene	4hour	Fold Change	Annotation
AFUA_5G06820	5.4765	44.5236	Afu5g06820 (Alt. Locus), hypothetical protein
AFUA_5G10510	4.57424	23.8222	Afu5g10510 (Alt. Locus), ABC transporter, putative, similar to Ybt1p (GI:6322980) (Saccharomyces cerevisiae), (3.6.3.-)
AFUA_6G03230	4.54624	23.3643	Afu6g03230 (Alt. Locus), cell wall glucanase/allergen F16-like, similar to Crh-like protein Crf1 (GI:27372089) (Aspergillus fumigatus) similar to rAsp f 9 (GI:2879890) (Aspergillus fumigatus) similar to glycosidase Crh1p (GI:6321628) (Saccharomyces cerevisiae), (3.2.1.-)
AFUA_3G10690	4.44639	21.8021	Afu3g10690 (Alt. Locus), calcium-translocating P-type ATPase(PMCA-type),putative, (3.6.3.8)
AFUA_3G00730	4.26896	19.2791	Afu3g00730 (Alt. Locus), conserved hypothetical protein
AFUA_8G01760	4.19717	18.3432	Afu8g01760 (Alt. Locus), hypothetical protein
AFUA_5G06070	4.15272	17.7866
AFUA_1G17460	4.12219	17.4142	Afu1g17460 (Alt. Locus), C6 transcription factor, putative
AFUA_2G12780	3.99856	15.9841	Afu2g12780 (Alt. Locus), von Willebrand domain protein, similar to GB:AAQ94870.1: BCSC1 (Mus musculus)
AFUA_3G11430	3.92908	15.2325	Afu3g11430 (Alt. Locus), arginase, putative, (3.5.3.1)
AFUA_1G11800	3.89434	14.8701	Afu1g11800 (Alt. Locus), HLH transcription factor, putative, identical to bhlh transcription factor (GI:41581255) (Aspergillus fumigatus) similar to bHLH transcription factor JAF13 (GI:3127045) (Petunia x hybrida)
AFUA_5G10490	3.88622	14.7866	Afu5g10490 (Alt. Locus), amidase, putative, (3.5.1.-)
AFUA_3G14150	3.87478	14.6698	Afu3g14150 (Alt. Locus), F-box domain protein
AFUA_1G13230	3.74243	13.3839	Afu1g13230 (Alt. Locus), conserved hypothetical protein, similar to GB:AAO49461.1: conserved hypothetical protein (Leptosphaeria maculans)
AFUA_6G07720	3.74021	13.3633	Afu6g07720 (Alt. Locus), phosphoenolpyruvate carboxykinase AcuF, similar to GB:AAL10705.1: phosphoenolpyruvate carboxykinase AcuF (Emericella nidulans) PMID: 11741859, 7614370, 3622 similar to phosphoenolpyruvate carboxykinase, key enzyme in gluconeogenesis, catalyzes early reaction in carbohydrate biosynthesis, glucose represses transcription and accelerates mRNA degradation, regulated by Mcm1p …
AFUA_1G03800	3.73967	13.3584	Afu1g03800 (Alt. Locus), C6 transcription factor, putative
AFUA_8G02430	3.73766	13.3398	Afu8g02430 (Alt. Locus), zinc-binding alcohol dehydrogenase, putative, similar to OMNI:GMSORF2317: oxidoreductase, zinc-binding (Mycobacterium smegmatis str.) MC2 155), (1.1.-.-)
AFUA_6G04360	3.72459	13.2195
AFUA_4G07010	3.68974	12.904	Afu4g07010 (Alt. Locus), hydrolase, TatD family protein, putative
AFUA_5G06010	3.61298	12.2353	Afu5g06010 (Alt. Locus), translation initiation factor eIF-6, putative
AFUA_4G03170	3.5678	11.8581	Afu4g03170 (Alt. Locus), conserved hypothetical protein
AFUA_5G07960	3.56342	11.8221	Afu5g07960 (Alt. Locus), C2H2 finger and ankyrin domain protein, putative
AFUA_8G02110	3.47878	11.1485	Afu8g02110 (Alt. Locus), hypothetical protein
AFUA_1G17470	3.46285	11.0261	Afu1g17470 (Alt. Locus), high affinity nitrate transporter NrtB
AFUA_4G11570	3.4533	10.9533	Afu4g11570 (Alt. Locus), G-patch domain protein (TFIP11), putative
AFUA_8G02130	3.40609	10.6007	Afu8g02130 (Alt. Locus), 1,3-beta-glucanosyltransferase, putative, similar to glycolipid anchored surface protein Gas1 (Swiss-Prot:P22146) (Saccharomyces cerevisiae)
AFUA_3G07300	3.33551	10.0946	Afu3g07300 (Alt. Locus), ABC multidrug transporter, putative, (3.6.3.-)
AFUA_4G14030	3.29577	9.8203	Afu4g14030 (Alt. Locus), conserved hypothetical protein
AFUA_1G12620	3.28614	9.75497	Afu1g12620 (Alt. Locus), MFS toxin efflux pump (AflT), putative, identical to AflT-like major facilitator superfamily protein (GI:42820667) (Aspergillus fumigatus) PMID: 14998527 similar to GB:BAC45239.1: aflatoxin efflux pump AFLT (Aspergillus oryzae)
AFUA_2G17930	3.23913	9.44224	Afu2g17930 (Alt. Locus), integral membrane protein, similar to sll1376 (GI:1653341) (Synechocystis sp. PCC 6803)
AFUA_3G02040	3.21917	9.3125	Afu3g02040 (Alt. Locus), glycosyl hydrolase, putative
AFUA_1G01690	3.15727	8.9214	Afu1g01690 (Alt. Locus), cytochrome P450 alkane hydroxylase, putative, (1.14.14.-)
AFUA_3G13010	3.08423	8.48099	Afu3g13010 (Alt. Locus), Zn-dependent hydrolase/oxidoreductase family protein, putative
AFUA_4G03340	3.0213	8.11901	Afu4g03340 (Alt. Locus), DUF1212 domain membrane protein, contains a DUF1212 domain
AFUA_3G00720	3.00246	8.01367	Afu3g00720 (Alt. Locus), DUF500 and UBA/TS-N domain protein
AFUA_2G02500	2.97366	7.85527	Afu2g02500 (Alt. Locus), conserved hypothetical protein
AFUA_4G06930	2.95794	7.77016	Afu4g06930 (Alt. Locus), methionine aminopeptidase, type II, putative, (3.4.11.18)
AFUA_3G09620	2.9539	7.74839	Afu3g09620 (Alt. Locus), RNA binding protein, putative
AFUA_2G02690	2.94314	7.69082	Afu2g02690 (Alt. Locus), fungal specific transcription factor, putative, similar to putative transcription factor containing a zinc finger; overexpression increases salt tolerance through increased expression of the ENA1 (Na+/Li+ extrusion pump) gene while gene disruption decreases both salt tolerance and ENA1 expression; Hal9p (GI:6324483) (Saccharomyces cerevisiae)
AFUA_6G13500	2.93256	7.63461	Afu6g13500 (Alt. Locus), conserved hypothetical protein
AFUA_2G16860	2.92057	7.57143	Afu2g16860 (Alt. Locus), MFS multidrug transporter, putative, similar to Cycloheximide resistance protein. (Swiss-Prot:P32071) (Candida maltosa) PubMed=1628836
AFUA_5G13940	2.90014	7.46497
AFUA_7G00390	2.84475	7.18381	Afu7g00390 (Alt. Locus), MFS multidrug transporter, putative
AFUA_2G08260	2.83913	7.1559	Afu2g08260 (Alt. Locus), FMN binding oxidoreductase, putative, (1.-.-.-)
AFUA_2G01720	2.83853	7.15292	Afu2g01720 (Alt. Locus), conserved hypothetical protein
AFUA_2G03060	2.83408	7.13087	Afu2g03060 (Alt. Locus), cactin, putative, similar to GB:AAF66981.1: cactin (Drosophila melanogaster) PMID: 10842059
AFUA_6G09090	2.83174	7.11932	Afu6g09090 (Alt. Locus), conserved hypothetical protein
AFUA_2G16490	2.81806	7.05214	Afu2g16490 (Alt. Locus), rhomboid family membrane protein
AFUA_1G15430	2.80227	6.97536	Afu1g15430 (Alt. Locus), lipase/esterase, putative
AFUA_1G00550	2.78959	6.91435	Afu1g00550 (Alt. Locus), conserved hypothetical protein
AFUA_4G06220	2.75666	6.75829	Afu4g06220 (Alt. Locus), conserved hypothetical protein
AFUA_2G04200	2.72448	6.6092	Afu2g04200 (Alt. Locus), 4-hydroxyphenylpyruvate dioxygenase, putative, similar to T-cell reactive protein, TCRP (GI:601846) (Coccidioides posadasii) PMID: 7642122 similar to 4-hydroxyphenylpyruvate dioxygenase (GI:4504477) (Homo sapiens) PMID: 9325050, (1.13.11.27)
AFUA_5G11110	2.72447	6.60917	Afu5g11110 (Alt. Locus), thiamin pyrophosphokinase-related protein
AFUA_4G09890	2.70238	6.50875	Afu4g09890 (Alt. Locus), conserved hypothetical protein
AFUA_1G10250	2.69338	6.46828	Afu1g10250 (Alt. Locus), hypothetical protein
AFUA_3G14130	2.67126	6.36985	Afu3g14130 (Alt. Locus), conserved hypothetical protein
AFUA_2G08660	2.66812	6.356	Afu2g08660 (Alt. Locus), conserved hypothetical protein
AFUA_5G04270	2.6415	6.23982	Afu5g04270 (Alt. Locus), AMP-binding enzyme, putative, (6.2.1.3)
AFUA_2G11350	2.61566	6.12903	Afu2g11350 (Alt. Locus), peroxisomal 3-ketoacyl-coA thiolase (Kat1), putative, similar to putative 3-ketoacyl-CoA thiolase; kat1 (GI:10129973) (Aspergillus oryzae) PMID: 11179668, (2.3.1.16)
AFUA_6G03320	2.61371	6.12077	Afu6g03320 (Alt. Locus), MFS multidrug transporter, putative
AFUA_2G14760	2.61315	6.11839	Afu2g14760 (Alt. Locus), BCS1-like ATPase, putative
AFUA_2G13930	2.56165	5.90384	Afu2g13930 (Alt. Locus), conserved hypothetical protein
AFUA_6G11520	2.53786	5.80728	Afu6g11520 (Alt. Locus), C6 transcription factor, putative
AFUA_5G08730	2.53233	5.78506	Afu5g08730 (Alt. Locus), conserved hypothetical protein
AFUA_2G04190	2.51216	5.70474	Afu2g04190 (Alt. Locus), conserved hypothetical protein
AFUA_8G02640	2.50908	5.69255	Afu8g02640 (Alt. Locus), C6 transcription factor, putative
AFUA_4G04380	2.50764	5.68689	Afu4g04380 (Alt. Locus), phenazine biosynthesis-like protein, putative, similar to GB:AAN30288.1: phenazine biosynthesis protein, PhzF family {Brucella suis 1330;} ^|^OMNI|BR1374|AAN30288.1|23348218| phenazine biosynthesis protein, PhzF family {Brucella suis 1330;}
AFUA_1G05770	2.49842	5.65066	Afu1g05770 (Alt. Locus), beta-glucosidase, putative, (3.2.1.21)
AFUA_7G01270	2.49775	5.64804	Afu7g01270 (Alt. Locus), DNA-directed polymerase kappa, putative, (6.3.5.5)
AFUA_5G08580	2.49752	5.64712	Afu5g08580 (Alt. Locus), alpha-1,6-mannosyltransferase subunit (Och1), putative, (2.4.1.-)
AFUA_4G08490	2.49252	5.62759	Afu4g08490 (Alt. Locus), acyl-CoA dehydrogenase, putative, (1.3.99.-)
AFUA_4G09840	2.48947	5.61572	Afu4g09840 (Alt. Locus), kynureninase, putative, similar to GB:AAQ86995.1: kynureninase (Polaribacter filamentus), (3.7.1.3)
AFUA_1G14050	2.48739	5.60761	Afu1g14050 (Alt. Locus), F-box domain protein
AFUA_5G08900	2.43705	5.41532	Afu5g08900 (Alt. Locus), D-arabinitol dehydrogenase ArbD, putative, similar to D-arabinitol dehydrogenase ArbD (GI:38505136) (Emericella nidulans), (1.1.1.69)
AFUA_7G01250	2.43075	5.39175	Afu7g01250 (Alt. Locus), hypothetical protein
AFUA_3G03280	2.42471	5.36923	Afu3g03280 (Alt. Locus), FAD binding monooxygenase, putative, (1.14.13.-)
AFUA_1G09700	2.41418	5.33015	Afu1g09700 (Alt. Locus), ankyrin repeat protein, contains Ankyrin repeats
AFUA_6G13570	2.39619	5.2641	Afu6g13570 (Alt. Locus), cytochrome c peroxidase, putative, (1.11.1.11)
AFUA_4G11310	2.3874	5.23213	Afu4g11310 (Alt. Locus), fructose-1,6-bisphosphatase Fbp1, putative, similar to fructose-1,6-bisphosphatase, key regulatory enzyme in the gluconeogenesis pathway, required for glucose metabolism; Fbp1p (GI:6323409) (Saccharomyces cerevisiae), (3.1.3.11)
AFUA_5G04170	2.37648	5.19269	Afu5g04170 (Alt. Locus), molecular chaperone and allergen Mod-E/Hsp90/Hsp1, allergen Asp F12, suppressor of vegetative incompatibility (Mod-E), identical to heat shock protein Hsp1 (GI:1930153) (Aspergillus fumigatus) PMID: 8491935, 12687087 similar to heat shock protein HSP90 (O43109) (Podospora anserina) PMID: 9335595 [Link to Allergen Table]
AFUA_1G03790	2.3749	5.18701	Afu1g03790 (Alt. Locus), mannosylphosphorylation protein (Mnn4), putative
AFUA_6G06470	2.33601	5.04903	Afu6g06470 (Alt. Locus), heat shock protein Hsp30-like, putative, similar to GB:BAD02411.1: heat shock protein 30 (Aspergillus oryzae)
AFUA_8G02040	2.33586	5.04852	Afu8g02040 (Alt. Locus), glycosyl transferase, putative, (2.4.1.-)
AFUA_3G14680	2.33036	5.02931	Afu3g14680 (Alt. Locus), lysophospholipase Plb3, identical to lysophospholipase (GI:36244728) (Aspergillus fumigatus) PMID: 14982117, 15451105 similar to phospholipase B (lysophospholipase) involved in lipid metabolism, required for deacylation of phosphatidylcholine and phosphatidylethanolamine but not phosphatidylinositol; Plb1p (GI:6323650) (Saccharomyces cerevisiae), (3.1.1.5)
AFUA_4G03400	2.32513	5.01111	Afu4g03400 (Alt. Locus), hypothetical protein
AFUA_2G02250	2.31465	4.97484	Afu2g02250 (Alt. Locus), allantoinase Dal1, putative, similar to allantoinase, converts allantoin to allantoate in the first step of allantoin degradation; expression sensitive to nitrogen catabolite repression; Dal1p (GI:6322218) (Saccharomyces cerevisiae), (3.5.2.5)
AFUA_2G00240	2.30189	4.93103	Afu2g00240 (Alt. Locus), conserved hypothetical protein
AFUA_2G14620	2.29788	4.91733	Afu2g14620 (Alt. Locus), conserved hypothetical protein, similar to protein of unconfirmed function, similar to cell surface flocculin Muc1p; ORF exhibits genomic organization compatible with a translational readthrough-dependent mode of expression; Bsc1p (GI:6320167) (Saccharomyces cerevisiae)
AFUA_1G02870	2.27716	4.84722	Afu1g02870 (Alt. Locus), conserved hypothetical protein
AFUA_2G09290	2.27528	4.84092	Afu2g09290 (Alt. Locus), antigenic mitochondrial protein HSP60, putative, similar to heat shock protein 60, mitochondrial precursor; antigen HIS-62 (SP:P50142) (Ajellomyces capsulatus)
AFUA_7G04710	2.26863	4.81867	Afu7g04710 (Alt. Locus), NF-X1 finger transcription factor, putative, similar to nuclear transcription factor, X-box binding 1 isoform 1; transcriptional repressor NF-X1 (GI:21361137) (Homo sapiens)
AFUA_1G00350	2.25424	4.77083	Afu1g00350 (Alt. Locus), metalloreductase, putative, similar to metalloreductase FreA (GI:24431223) (Emericella nidulans) PMID: 12406779, (1.16.1.-)
AFUA_4G07020	2.24716	4.74746	Afu4g07020 (Alt. Locus), mitochondrial cytochrome b2-like, putative, (1.1.2.3)
AFUA_4G09700	2.24691	4.74665	Afu4g09700 (Alt. Locus), conserved hypothetical protein
AFUA_6G04640	2.24604	4.74381	Afu6g04640 (Alt. Locus), hydrolase, alpha/beta fold family, putative
AFUA_3G14140	2.24323	4.73455	Afu3g14140 (Alt. Locus), metacaspase CasB, similar to metacaspase CasA (GI:27436420) (Aspergillus nidulans) similar to metacaspase Mca1p (GI:6324771) (Saccharomyces cerevisiae) contains an ICE-like protease (caspase) p20 domain, (3.4.22.36)
AFUA_6G12640	2.24204	4.73066	Afu6g12640 (Alt. Locus), conserved hypothetical protein
AFUA_5G09100	2.23104	4.69472	Afu5g09100 (Alt. Locus), MAP kinase MpkC, (2.7.1.-)
AFUA_3G08010	2.22783	4.6843	Afu3g08010 (Alt. Locus), C2H2 transcription factor (Ace1), putative
AFUA_3G03230	2.22558	4.677	Afu3g03230 (Alt. Locus), bZIP transcription factor, putative
AFUA_5G04310	2.22057	4.66076	Afu5g04310 (Alt. Locus), peroxisomal membrane protein Pmp47, putative
AFUA_8G04560	2.20557	4.61255	Afu8g04560 (Alt. Locus), integral membrane protein
AFUA_4G13730	2.1998	4.59417	Afu4g13730 (Alt. Locus), conserved hypothetical protein
AFUA_8G05030	2.19122	4.56692	Afu8g05030 (Alt. Locus), conserved hypothetical protein
AFUA_1G13970	2.17555	4.51759	Afu1g13970 (Alt. Locus), MFS transporter, putative
AFUA_3G10370	2.16832	4.49499	Afu3g10370 (Alt. Locus), conserved hypothetical protein
AFUA_1G02580	2.16797	4.49391	Afu1g02580 (Alt. Locus), lipase, putative, (3.1.-.-)
AFUA_1G11180	2.16499	4.48462	Afu1g11180 (Alt. Locus), heat shock protein/chaperonin HSP78, putative, similar to GB:AAO49455.1: heat shock protein 78 {Leptosphaeria maculans;}
AFUA_1G11910	2.16022	4.46982	Afu1g11910 (Alt. Locus), conserved histidine-rich protein, hypothetical protein (GI:41581266) (Aspergillus fumigatus)
AFUA_5G07650	2.15981	4.46855	Afu5g07650 (Alt. Locus), F-box domain and ankyrin repeat protein, contains F-box domain and Ankyrin repeats
AFUA_3G08530	2.15784	4.46247	Afu3g08530 (Alt. Locus), MFS drug transporter, putative
AFUA_3G13000	2.15372	4.44975	Afu3g13000 (Alt. Locus), mitochondrial chaperone BCS1, putative, similar to SP:P32839: Mitochondrial chaperone BCS1(Saccharomyces cerevisiae)
AFUA_5G00790	2.1508	4.44074	Afu5g00790 (Alt. Locus), ABC multidrug transporter, putative
AFUA_4G04640	2.14396	4.41972	Afu4g04640 (Alt. Locus), ubiquitin fusion degradation protein (Ufd1), putative, similar to PRLI-interacting factor K (GI:11139266) (Arabidopsis thaliana) similar to Ufd1p (GI:6321485) (Saccharomyces cerevisiae)
AFUA_1G02770	2.14104	4.41079	Afu1g02770 (Alt. Locus), conserved hypothetical protein
AFUA_5G10480	2.13979	4.40699	Afu5g10480 (Alt. Locus), molybdenum cofactor biosynthetic protein (CnxF), putative
AFUA_5G07640	2.13346	4.38768	Afu5g07640 (Alt. Locus), RNA 3\'-terminal phosphate cyclase, putative, (6.5.1.4)
AFUA_2G03070	2.13182	4.38269	Afu2g03070 (Alt. Locus), conserved hypothetical protein
AFUA_4G03900	2.13131	4.38114	Afu4g03900 (Alt. Locus), peroxisomal multifunctional beta-oxidation protein (MFP), putative, similar to multifunctional beta-oxidation protein; MFP (SP:Q01373) (Neurospora crassa)
AFUA_2G12630	2.12954	4.37578	Afu2g12630 (Alt. Locus), allergenic cerato-platanin Asp F13, identical to rAsp f 13 (GI:3005841) (Aspergillus fumigatus) similar to GB:CAC84090.2: cerato-platanin (Ceratocystis fimbriata f. sp. platani) PMID: 10455173, 15063505 [Link to Allergen Table]
AFUA_2G05060	2.12029	4.34782	Afu2g05060 (Alt. Locus), alternative oxidase AlxA, putative, similar to alternative oxidase, mitochondrial precursor AOX1 (GI:51701286) (Cryptococcus neoformans var. grubii) PMID: 14500501 mitochondrial alternative oxidase Aod-1 (GI:24061751) (Emericella nidulans) PMID: 12781676, (1.-.-.-)
AFUA_2G05620	2.11446	4.33027	Afu2g05620 (Alt. Locus), signal transducer, putative
AFUA_1G09890	2.11277	4.3252	Afu1g09890 (Alt. Locus), conserved hypothetical protein
AFUA_1G04750	2.10076	4.28935	Afu1g04750 (Alt. Locus), cyclin (Pcl1), putative, similar to GB:AAW44590.1: g1/s-specific cyclin pcl1 (cyclin hcs26), putative (Cryptococcus neoformans) similar to Pho85 cyclin of the Pcl1,2-like subfamily, involved in entry into the mitotic cell cycle and regulation of morphogenesis, localizes to sites of polarized cell growth; Pcl1p (GI:6324040) (Saccharomyces cerevisiae)
AFUA_6G10470	2.09621	4.27586	Afu6g10470 (Alt. Locus), zinc finger protein ZPR1
AFUA_1G11400	2.07458	4.21222	Afu1g11400 (Alt. Locus), alpha/beta fold family hydrolase, putative, (3.-.-.-)
AFUA_5G11620	2.06908	4.1962	Afu5g11620 (Alt. Locus), pre-mRNA splicing factor RNA helicase (Prp43), putative, (3.6.-.-)
AFUA_2G10240	2.06269	4.17763	Afu2g10240 (Alt. Locus), NAD binding Rossmann fold oxidoreductase, putative, similar to Myo-inositol 2-dehydrogenase (Swiss-Prot:O68965) (Sinorhizobium meliloti) PubMed=9802033 similar to Streptomycin biosynthesis protein strI (Swiss-Prot:P09400) (Streptomyces griseus) PubMed=1654502, (1.-.-.-)
AFUA_4G04280	2.05459	4.15425	Afu4g04280 (Alt. Locus), AN1 zinc finger protein
AFUA_2G17440	2.04814	4.13572	Afu2g17440 (Alt. Locus), 2-amino-3-carboxymuconate-6-semialdehyde decarboxylase, putative, similar to SP:Q8R5M5: 2-amino-3-carboxymuconate-6-semialdehyde decarboxylase (Rattus norvegicus) similar to SP:Q8TDX5: 2-amino-3-carboxymuconate-6-semialdehyde decarboxylase (Homo sapiens) PMID: 15206762, (4.1.1.45)
AFUA_8G04340	2.03734	4.10487	Afu8g04340 (Alt. Locus), cystathionine gamma-lyase, (4.4.1.8)
AFUA_1G13910	2.02653	4.07424	Afu1g13910 (Alt. Locus), TFIIH complex helicase Rad3, putative, similar to 5\' to 3\' DNA helicase, involved in nucleotide excision repair and transcription; subunit of RNA polymerase II transcription initiation factor TFIIH; subunit of Nucleotide Excision Repair Factor 3 (NEF3); homolog of human XPD protein; Rad3p (GI:6321019) (Saccharomyces cerevisiae) similar to GB:CAA36463.1: ercc2 gene produ…
AFUA_5G12170	2.01692	4.04719	Afu5g12170 (Alt. Locus), conserved hypothetical protein
AFUA_5G07970	2.00899	4.025	Afu5g07970 (Alt. Locus), ABC metal ion transporter, putative, similar to Metal resistance protein YCF1; Yeast cadmium factor 1 (SP:P39109) (Saccharomyces cerevisiae) PMID: 10790694
AFUA_5G13920	2.00786	4.02186	Afu5g13920 (Alt. Locus), Hsp90 binding co-chaperone (Sba1), putative, similar to Co-chaperone that binds to and regulates Hsp90 family chaperones; important for pp60v-src activity in yeast; homologous to the mammalian p23 proteins; Sba1p (GI:6322732) (Saccharomyces cerevisiae)
AFUA_2G04060	2.00166	4.00459	Afu2g04060 (Alt. Locus), NADH:flavin oxidoreductase/NADH oxidase family protein
AFUA_6G08840	1.99544	3.98739	Afu6g08840 (Alt. Locus), beta-mannosidase, (3.2.1.25)
AFUA_1G15140	1.99368	3.9825	Afu1g15140 (Alt. Locus), mitochondrial phosphate carrier protein (Mir1), putative
AFUA_6G00290	1.98713	3.96447	Afu6g00290 (Alt. Locus), aminotransferase, putative, (2.6.1.1)
AFUA_8G05120	1.97935	3.94314	Afu8g05120 (Alt. Locus), conserved hypothetical protein
AFUA_2G02700	1.97926	3.9429	Afu2g02700 (Alt. Locus), mitochondrial DnaJ chaperone (Tim14), putative
AFUA_8G04580	1.97811	3.93978	Afu8g04580 (Alt. Locus), conserved hypothetical protein
AFUA_8G05590	1.97515	3.93168	Afu8g05590 (Alt. Locus), oxidoreductase, short chain dehydrogenase/reductase family
AFUA_1G13840	1.96271	3.89794	Afu1g13840 (Alt. Locus), integral membrane protein, Mpv17/PMP22 family, putative
AFUA_6G07990	1.96208	3.89624	Afu6g07990 (Alt. Locus), oxidoreductase, 2OG-Fe(II) oxygenase family family
AFUA_1G15000	1.95479	3.8766	Afu1g15000 (Alt. Locus), 2-isopropylmalate synthase, (4.1.3.12)
AFUA_2G12490	1.95233	3.86999	Afu2g12490 (Alt. Locus), lipase, putative, (3.1.1.-)
AFUA_8G05805	1.95124	3.86707	Afu8g05805 (Alt. Locus), cellobiose dehydrogenase, putative
AFUA_2G10910	1.94489	3.85009	Afu2g10910 (Alt. Locus), MFS alpha-glucoside transporter, putative
AFUA_5G01750	1.94126	3.84041	Afu5g01750 (Alt. Locus), MATH and UCH domain protein, putaitve, deubiquitinating enzyme, ubiquitin C-terminal hydrolase, putative, contains MATH, UCH and RING finger domains and four MORN repeats similar to ubiquitin carboxyl-terminal hydrolase Ubp21p (GI:15214325) (Schizosaccharomyces pombe) similar to ubiquitin-specific protease USP7/HAUSP (GI:34851150) (Homo sapiens), (3.1.2.15)
AFUA_2G04210	1.9401	3.83733	Afu2g04210 (Alt. Locus), conserved hypothetical protein
AFUA_6G10840	1.91446	3.76972	Afu6g10840 (Alt. Locus), conserved hypothetical protein
AFUA_3G12740	1.91439	3.76954	Afu3g12740 (Alt. Locus), copper resistance-associated P-type ATPase, putative, similar to Probable copper-transporting ATPase (EC 3.6.3.4) (Cu(2 )-ATPase). (Swiss-Prot:P38360) (Saccharomyces cerevisiae;) PMID: 7754711, (3.6.3.4)
AFUA_1G05040	1.91269	3.7651	Afu1g05040 (Alt. Locus), protein mitochondrial targeting protein (Mas1), putative, similar to mitochondrial protein import protein MAS5; Protein YDJ1 (SP:P25491) (Saccharomyces cerevisiae) PMID: 1729605
AFUA_2G08090	1.91047	3.75932	Afu2g08090 (Alt. Locus), conserved hypothetical protein
AFUA_7G08220	1.90894	3.75532	Afu7g08220 (Alt. Locus), hypothetical protein
AFUA_5G03230	1.90761	3.75187	Afu5g03230 (Alt. Locus), stress response RCI peptide, putative, similar to low temperature and salt responsive protein LTI6B (GI:6714402) (Arabidopsis thaliana) similar to hydrophobic protein RCI2A (GI:13957674) (Arabidopsis thaliana) PMID: 11299347
AFUA_4G09170	1.90476	3.74446	Afu4g09170 (Alt. Locus), anion exchange family protein
AFUA_6G02790	1.88905	3.70392	Afu6g02790 (Alt. Locus), conserved hypothetical protein
AFUA_2G09960	1.87884	3.6778	Afu2g09960 (Alt. Locus), mitochondrial Hsp70 chaperone (Ssc70), putative, similar to Heat shock protein SSC1, mitochondrial precursor; Endonuclease SCEI 75kDa subunit (SP:P12398) (Saccharomyces cerevisiae) PMID: 2674677 PMID: 2203771
AFUA_1G14850	1.87511	3.6683	Afu1g14850 (Alt. Locus), acyl-CoA dehydrogenase, putative, (1.3.99.-)
AFUA_6G06740	1.86891	3.65256	Afu6g06740 (Alt. Locus), endoplasmic reticulum calcium ATPase, putative, similar to sarcoplasmic/endoplasmic reticulum calcium ATPase 1 (SP:Q92105) (Rana esculenta) PMID: 1386027, (3.6.3.8)
AFUA_4G07210	1.85888	3.62726	Afu4g07210 (Alt. Locus), mitochondrial acetolactate synthase small subunit, putative, (4.1.3.18)
AFUA_2G09510	1.84937	3.60343	Afu2g09510 (Alt. Locus), conserved hypothetical protein
AFUA_6G02210	1.82033	3.53161	Afu6g02210 (Alt. Locus), cytochrome P450 monooxygenase, putative, trichothecene C-15 hydroxylase (Fusarium culmorum) PMID: 12080147, (1.14.-.-)
AFUA_2G17480	1.81868	3.52757	Afu2g17480 (Alt. Locus), amino acid transporter, putative
AFUA_8G04890	1.81843	3.52697	Afu8g04890 (Alt. Locus), conserved hypothetical protein
AFUA_1G02700	1.81544	3.51967	Afu1g02700 (Alt. Locus), zinc metallopeptidase, putative
AFUA_1G05370	1.81154	3.51017	Afu1g05370 (Alt. Locus), conserved hypothetical protein, similar to SIN3 protein-binding protein STB3; Stb3p (GI:988313) (Saccharomyces cerevisiae) PMID: 9393435
AFUA_5G08170	1.81037	3.50732	Afu5g08170 (Alt. Locus), autophagocytosis protein Aut1, putative, similar to SP:P40344: Autophagocytosis protein AUT1 (Saccharomyces cerevisiae)
AFUA_3G12060	1.80255	3.48835	Afu3g12060 (Alt. Locus), Methionine synthase, vitamin-B12 independent, putative
AFUA_1G17060	1.80167	3.48623	Afu1g17060 (Alt. Locus), HLH DNA binding domain protein, putative
AFUA_6G04750	1.80153	3.48589	Afu6g04750 (Alt. Locus), Hsp70 nucleotide exchange factor (Fes1), putative, similar to Hsp70 (Ssa1p) nucleotide exchange factor, cytosolic homolog of Sil1p, which is the nucleotide exchange factor for BiP (Kar2p) in the endoplasmic reticulum; Fes1p (GI:6319577) (Saccharomyces cerevisiae)
AFUA_1G14750	1.79694	3.47482	Afu1g14750 (Alt. Locus), C2H2 transcription factor (Sfp1), putative
AFUA_7G04170	1.79141	3.46154	Afu7g04170 (Alt. Locus), C6 transcription factor, putative
AFUA_2G04760	1.78741	3.45195	Afu2g04760 (Alt. Locus), BTB domain and ankyrin repeat protein
AFUA_4G00340	1.78282	3.44099	Afu4g00340 (Alt. Locus), conserved hypothetical protein
AFUA_4G10660	1.76893	3.40802	Afu4g10660 (Alt. Locus), histone acetylase complex subunit MRG15-2
AFUA_1G04160	1.76756	3.40479	Afu1g04160 (Alt. Locus), aspartate aminotransferase, putative, similar to GB:AAA33408.1: aspartate aminotransferase P1 {Lupinus angustifolius;}, (2.6.1.1)
AFUA_1G13340	1.76285	3.39369	Afu1g13340 (Alt. Locus), DUF6 domain protein, putative
AFUA_2G04150	1.75736	3.38079	Afu2g04150 (Alt. Locus), C6 transcription factor, putative
AFUA_6G08830	1.75407	3.37309	Afu6g08830 (Alt. Locus), 2-oxoisovalerate dehydrogenase complex alpha subunit, putative, (1.2.4.4)
AFUA_4G13800	1.75304	3.37067	Afu4g13800 (Alt. Locus), extracellular sialidase/neuraminidase, putative, similar to sialidase/neuraminidase NedA (GI:585539) (Micromonospora viridifaciens) PMID: 1400240 PMID: 8591030, (3.2.1.18)
AFUA_5G01830	1.74559	3.35332	Afu5g01830 (Alt. Locus), extracellular endoglucanase, putative, (3.2.1.4)
AFUA_1G07750	1.74232	3.34573	Afu1g07750 (Alt. Locus), SWIRM domain protein Fun19, putative, similar to non-essential protein of unknown function; Fun19p (GI:37362610) (Saccharomyces cerevisiae) PMID: 1583694
AFUA_5G02360	1.74232	3.34573	Afu5g02360 (Alt. Locus), vacuolar dynamin-like GTPase VpsA, putative, similr to VpsA (GI:17148576) (Emericella nidulans) PMID: 11368897 similr to SP:P21576: Vacuolar sorting protein 1, GTP-binding protein VPS1 (Saccharomyces cerevisiae) PMID: 8299420, (3.6.5.5)
AFUA_1G14420	1.73444	3.3275	Afu1g14420 (Alt. Locus), conserved hypothetical protein
AFUA_4G03840	1.73401	3.32651	Afu4g03840 (Alt. Locus), DNA repair protein Rhp26/Rad26, putative, similar to protein involved in transcription-coupled repair nucleotide excision repair of UV-induced DNA lesions; homolog of human CSB protein; Rad26p (GI:6322495) (Saccharomyces cerevisiae)
AFUA_5G06460	1.73295	3.32407	Afu5g06460 (Alt. Locus), C6 finger domain protein, putative
AFUA_7G04250	1.73202	3.32192
AFUA_2G13110	1.73148	3.32069	Afu2g13110 (Alt. Locus), cytochrome c, similar to cytochrome c (GI:11128019) (Homo sapiens)
AFUA_4G09830	1.72942	3.31596	Afu4g09830 (Alt. Locus), indoleamine 2,3-dioxygenase pyrrole 2,3-dioxygenase)
AFUA_6G13220	1.72547	3.30689	Afu6g13220 (Alt. Locus), hypothetical protein
AFUA_2G02220	1.72497	3.30574	Afu2g02220 (Alt. Locus), UDP-glucose:sterol glycosyltransferase
AFUA_4G13970	1.72296	3.30114	Afu4g13970 (Alt. Locus), conserved hypothetical protein
AFUA_6G13540	1.72268	3.30048	Afu6g13540 (Alt. Locus), carboxypeptidase CpyA/Prc1, putative, similar to vacuolar carboxypeptidase Y (proteinase C), involved in protein degradation in the vacuole and required for full protein degradation during sporulation; Prc1p (GI:6323955) (Saccharomyces cerevisiae) similar to serine-type carboxypeptidase CpyA (GI:14211580) (Emericella nidulans) PMID: 11440134, (3.4.16.5)
AFUA_4G07500	1.7223	3.29962	Afu4g07500 (Alt. Locus), small nucleolar ribonucleoprotein complex subunit, putative, Similar to PIR:S69026: hypothetical protein YPR137w - yeast (Saccharomyces cerevisiae) identified as an U3 snoRNP protein at SGD.
AFUA_7G04100	1.72122	3.29716	Afu7g04100 (Alt. Locus), conserved hypothetical protein
AFUA_2G03220	1.71948	3.29318	Afu2g03220 (Alt. Locus), Bax Inhibitor family protein, similar to Bax inhibitor-1, BI-1 (GI:21355991) (Drosophila melanogaster) PMID: 14659883 PMID: 15304216 contains a UPF0005 domain
AFUA_1G11900	1.7183	3.29047	Afu1g11900 (Alt. Locus), PQ loop repeat protein, contains PQ loop repeats
AFUA_5G07210	1.71373	3.28007	Afu5g07210 (Alt. Locus), homoserine O-acetyltransferase, putative, similar to homoserine o-acetyltransferase met-5 (GI:15982697) (Neurospora crassa), (2.3.1.31)
AFUA_5G02940	1.71229	3.27682	Afu5g02940 (Alt. Locus), choline transport protein Ctr, putative, similar to choline transport protein CTR (GI:171330) (Saccharomyces cerevisiae) PUBMED 2203793
AFUA_5G09220	1.70347	3.25683	Afu5g09220 (Alt. Locus), Beige/BEACH domain protein
AFUA_4G09140	1.702	3.25351	Afu4g09140 (Alt. Locus), L-ornithine aminotransferase Car2, putative, similar to L-ornithine transaminase (OTAse), catalyzes the second step of arginine degradation, expression is dually-regulated by allophanate induction and a specific arginine induction process; not nitrogen catabolite repression sensitive; Car2p (GI:6323470) (Saccharomyces cerevisiae), (2.6.1.13)
AFUA_4G11650	1.69721	3.24273	Afu4g11650 (Alt. Locus), alpha-ketoglutarate dehydrogenase complex subunit Kgd1, putative, Component of the mitochondrial alpha-ketoglutarate dehydrogenase complex, which catalyzes a key step in the tricarboxylic acid (TCA) cycle, the oxidative decarboxylation of alpha-ketoglutarate to form succinyl-CoA; Kgd1p (GI:6322066) (Saccharomyces cerevisiae), (1.2.4.2)
AFUA_4G13860	1.69358	3.23459	Afu4g13860 (Alt. Locus), extracellular salicylate hydroxylase/monooxygenase, putative, similar to GB:BAA61829.1: salicylate hydroxylase {Pseudomonas putida;}, (1.14.13.-)
AFUA_7G06090	1.68902	3.22437	Afu7g06090 (Alt. Locus), fatty-acyl coenzyme A oxidase (Pox1), putative, similar to fatty-acyl coenzyme A oxidase, involved in the fatty acid beta-oxidation pathway; localized to the peroxisomal matrix; Pox1p (GI:6321233) (Saccharomyces cerevisiae), (1.3.3.6)
AFUA_5G07950	1.688	3.22209	Afu5g07950 (Alt. Locus), serine/threonine protein kinase, putative, similar to Meiosis-specific serine/threonine-protein kinase MEK1 (EC 2.7.1.37). (Swiss-Prot:P24719) (Saccharomyces cerevisiae;)
AFUA_3G01080	1.68051	3.20541	Afu3g01080 (Alt. Locus), conserved hypothetical protein
AFUA_7G05860	1.68012	3.20455	Afu7g05860 (Alt. Locus), RING finger domain protein
AFUA_3G14240	1.68001	3.20431	Afu3g14240 (Alt. Locus), tRNA splicing protein (Spl1), putative, (2.6.1.-)
AFUA_4G12340	1.67985	3.20395	Afu4g12340 (Alt. Locus), mitochondrial carrier protein, putative
AFUA_4G03650	1.67728	3.19823	Afu4g03650 (Alt. Locus), ribosome associated DnaJ chaperone Zuotin, putative, similar to zuotin (SP:P32527) (Saccharomyces cerevisiae)
AFUA_6G14300	1.67597	3.19535	Afu6g14300 (Alt. Locus), FAD binding domain protein
AFUA_6G07120	1.6686	3.17906	Afu6g07120 (Alt. Locus), nuclear movement protein NudC, similar to nuclear movement protein NudC (GI:128397) (Aspergillus nidulans FGSC A4) PMID: 8824456, 2199460, 7612965
AFUA_3G06850	1.66779	3.17728	Afu3g06850 (Alt. Locus), conserved hypothetical protein
AFUA_2G04980	1.66744	3.17649	Afu2g04980 (Alt. Locus), tyrosine decarboxylase, putative, (4.1.1.-)
AFUA_1G02330	1.6626	3.16586	Afu1g02330 (Alt. Locus), conserved hypothetical protein
AFUA_1G16570	1.65972	3.15955	Afu1g16570 (Alt. Locus), MIND kinetochore complex component Mtw1, putative, similar to essential component of the MIND kinetochore complex (Mtw1p Including Nnf1p-Nsl1p-Dsn1p) which joins kinetochore subunits contacting DNA to those contacting microtubules; critical to kinetochore assembly; Mtw1p (GI:6319283) (Saccharomyces cerevisiae)
AFUA_2G00570	1.65638	3.15224	Afu2g00570 (Alt. Locus), GNAT family acetyltransferase, putative, similar to GNAT-family acetyltransferase (GI:33575845) (Bordetella bronchiseptica)
AFUA_2G17880	1.65386	3.14674	Afu2g17880 (Alt. Locus), C6 finger domain protein, putative
AFUA_5G02140	1.64772	3.13338	Afu5g02140 (Alt. Locus), inositol polyphosphate phosphatase, putative
AFUA_3G07570	1.63791	3.11215	Afu3g07570 (Alt. Locus), conserved hypothetical protein
AFUA_4G10010	1.63724	3.11071	Afu4g10010 (Alt. Locus), Hsp90 co-chaperone Cdc37, similar to Hsp90 co-chaperone Cdc37 (Hsp90 chaperone protein kinase-targetingsubunit) (Cell division control protein 37). (Swiss-Prot:O94740) (Schizosaccharomyces pombe;) PubMed=14652737 similar to Hsp90 co-chaperone Cdc37 (Hsp90 chaperone protein kinase-targetingsubunit) (Cell division control protein 37). (Swiss-Prot:P06101) (Saccharomyces cere…
AFUA_4G02810	1.63088	3.09701	Afu4g02810 (Alt. Locus), oxidoreductase, putative
AFUA_2G01350	1.62903	3.09306	Afu2g01350 (Alt. Locus), NAD+ kinase Utr1, putative, similar to NAD kinase, active as a hexamer; enhances the activity of ferric reductase (Fre1p); Utr1p (GI:6322509) (Saccharomyces cerevisiae) PMID: 11425472, (2.7.1.23)
AFUA_4G11760	1.62281	3.07974	Afu4g11760 (Alt. Locus), conserved hypothetical protein
AFUA_1G14150	1.62072	3.07529	Afu1g14150 (Alt. Locus), conserved hypothetical protein
AFUA_2G08900	1.61897	3.07156	Afu2g08900 (Alt. Locus), voltage-gated chloride channel (ClcA), putative, similar to CLC channel AnCLCA (GI:29825714) (Emericella nidulans) similar to chloride channel protein 3 (Swiss-Prot:P51792) (Rattus norvegicus)
AFUA_4G05920	1.61702	3.0674	Afu4g05920 (Alt. Locus), mitochondrial protein sorting (Msf1), putative, similar to MSF1 protein (SP:P35200) (Saccharomyces cerevisiae)
AFUA_5G07040	1.61341	3.05974	Afu5g07040 (Alt. Locus), ubiquitin conjugating enzyme (UbcA), putative, similar to UBC1 ubiquitin-conjugating enzyme (GI:136635) (Saccharomyces cerevisiae), (6.3.2.19)
AFUA_3G08630	1.61273	3.0583	Afu3g08630 (Alt. Locus), coactivator bridging factor 1 (Mbf1), putative, similar to GB:BAA33217.1: MBF1 {Saccharomyces cerevisiae;} PMID: 9710580
AFUA_3G01050	1.60927	3.05096	Afu3g01050 (Alt. Locus), conserved hypothetical protein
AFUA_5G08110	1.60763	3.04751	Afu5g08110 (Alt. Locus), origin recognition complex subunit 2, putative
AFUA_3G06370	1.60624	3.04458	Afu3g06370 (Alt. Locus), CHCH domain protein
AFUA_3G09880	1.60587	3.04378	Afu3g09880 (Alt. Locus), exosome complex exonuclease Rrp6, putative, similar to Exonuclease component of the nuclear exosome; contributes to the quality-control system that retains and degrades aberrant mRNAs in the nucleus; Rrp6p (GI:6324574) (Saccharomyces cerevisiae), (3.1.-.-)
AFUA_6G12160	1.60584	3.04373	Afu6g12160 (Alt. Locus), C6 transcription factor, putative, similar to zinc binuclear cluster-type gene Zfr1 (GI:40288409) (Gibberella moniliformis) PMID: 15128515
AFUA_1G04440	1.6053	3.04259	Afu1g04440 (Alt. Locus), proline utilization protein PrnX-like, putative, similar to GB:CAC18797.1: PrnX protein (Emericella nidulans) PMID: 9622360
AFUA_7G04860	1.60421	3.04029	Afu7g04860 (Alt. Locus), dimethyladenosine transferase, (2.1.1.-)
AFUA_5G14030	1.5962	3.02346	Afu5g14030 (Alt. Locus), endo-1,3(4)-beta-glucanase, putative, similar to endo-beta-1,3-1,4 glucanase BglS (GI:1170128) (Bacillus subtilis), (3.2.1.6)
AFUA_5G08120	1.59615	3.02336	Afu5g08120 (Alt. Locus), arginine biosynthesis bifunctional protein ArgJ, (2.3.1.35)
AFUA_8G06080	1.59501	3.02097	Afu8g06080 (Alt. Locus), flavohemoprotein, putative, similar to nitric oxide oxidoreductase, flavohemoglobin involved in nitric oxide detoxification; plays a role in the oxidative and nitrosative stress responses; Yhb1p (Saccharomyces cerevisiae)
AFUA_4G11150	1.58896	3.00833	Afu4g11150 (Alt. Locus), ADAM family of metalloprotease ADM-B, identical to ADAM protease ADM-B (GI:61608430) (Aspergillus fumigatus) PMID: 15936900 similar to GB:AAQ89237.1: ADAM12 (Homo sapiens) PMID: 12915587
AFUA_4G10460	1.58467	2.99939	Afu4g10460 (Alt. Locus), homocitrate synthase, (4.1.3.21)
AFUA_3G08560	1.58419	2.99839	Afu3g08560 (Alt. Locus), cation transport protein ChaC, putative
AFUA_2G00940	1.584	2.998	Afu2g00940 (Alt. Locus), hypothetical protein
AFUA_3G08230	1.5808	2.99136	Afu3g08230 (Alt. Locus), MRS7 family protein, similar to GB:AAB70096.1: Mrs7p (Saccharomyces cerevisiae) PMID: 8252639
AFUA_2G11040	1.58042	2.99056	Afu2g11040 (Alt. Locus), U-box domain protein, putative, similar to STIP1 homology and U-Box containing protein STUB1, CHIP (GI:14043119) (Homo sapiens) PMID: 11557750 similar to Ubiquitin conjugation factor E4 (Ubiquitin fusion degradation protein2) (UB fusion protein 2). (Swiss-Prot:Q9HE05) (Schizosaccharomyces pombe;) PubMed=10759889
AFUA_6G06620	1.579	2.98763	Afu6g06620 (Alt. Locus), COPII vesicles protein Yip3, putative, similar to protein localized to COPII vesicles, proposed to be involved in ER to Golgi transport; interacts with members of the Rab GTPase family and Yip1p; also interacts with Rtn1p; Yip3p (GI:6681850) (Saccharomyces cerevisiae)
AFUA_7G04880	1.57881	2.98723	Afu7g04880 (Alt. Locus), sterol glucosyltransferase, putative, contains UDP-glucoronosyl and UDP-glucosyl transferase domains
AFUA_7G01790	1.57721	2.98392	Afu7g01790 (Alt. Locus), MFS transporter, putative, similar to slasma membrane sulfite pump involved in sulfite metabolism and required for efficient sulfite efflux; major facilitator superfamily protein; Ssu1p (GI:6325165) (Saccharomyces cerevisiae)
AFUA_1G03030	1.57265	2.97451	Afu1g03030 (Alt. Locus), conserved hypothetical protein
AFUA_4G03100	1.56957	2.96816	Afu4g03100 (Alt. Locus), ras-like GTP-binding protein, putative, similar to Ras-like GTP-binding protein RYL2 (Swiss-Prot:P41925) (Yarrowia lipolytica)
AFUA_4G01260	1.56234	2.95332	Afu4g01260 (Alt. Locus), mitochondrial chaperone ATPase (Bcs1), putative
AFUA_4G12940	1.56042	2.9494	Afu4g12940 (Alt. Locus), hypothetical protein
AFUA_3G11590	1.55693	2.94226	Afu3g11590 (Alt. Locus), Taz1-interacting factor 1 (TAF1), putative, autophagy protein Apg11, putative, similar to Taz1 interacting factor 1; Protein taf1 (GI:29839446) (Schizosaccharomyces pombe) contains regions of low complexity
AFUA_7G01860	1.55576	2.93989	Afu7g01860 (Alt. Locus), heat shock protein (Sti1), putative, similar to SP:P15705: Heat shock protein STI1; stress-induced protein STI (Saccharomyces cerevisiae)
AFUA_2G04020	1.55534	2.93903	Afu2g04020 (Alt. Locus), alpha,alpha-trehalose phosphate synthase subunit, putative, (2.4.1.15)
AFUA_5G04050	1.5549	2.93813	Afu5g04050 (Alt. Locus), scramblase family protein, contains a scramblase domain similar to putative protein of unknown function, appears related to murine NOR1, which is highly expressed in leukemogenic cell lines; Yjr100cp (GI:6322560) (Saccharomyces cerevisiae)
AFUA_5G08780	1.55391	2.93612	Afu5g08780 (Alt. Locus), cell wall glucanase, putative, beta-1,3-glucanosyltransferase (GI:41581223) (Aspergillus fumigatus), (3.2.1.-)
AFUA_3G08020	1.54886	2.92585	Afu3g08020 (Alt. Locus), PX domain protein
AFUA_2G11810	1.54376	2.91554	Afu2g11810 (Alt. Locus), pre-rRNA processing protein Rrp12, putative, similar to protein required for export of the ribosomal subunits; associates with the RNA components of the pre-ribosomes; contains HEAT-repeats; Rrp12p (GI:6325245) (Saccharomyces cerevisiae)
AFUA_5G03040	1.5432	2.91441	Afu5g03040 (Alt. Locus), DnaJ domain protein, contains a DnaJ domain
AFUA_4G12240	1.53736	2.90262	Afu4g12240 (Alt. Locus), nitrilase, putitive
AFUA_4G06320	1.52791	2.88367	Afu4g06320 (Alt. Locus), 4F5 domain protein, contains a 4F5 domain
AFUA_1G06700	1.52758	2.88302	Afu1g06700 (Alt. Locus), metacaspase CasA, similar to metacaspase CasA (GI:27436420) (Aspergillus nidulans) similar to metacaspase Mca1p (GI:6324771) (Saccharomyces cerevisiae) contains an ICE-like protease (caspase) p20 domain, (3.4.22.36)
AFUA_3G08850	1.52467	2.8772	Afu3g08850 (Alt. Locus), FAD dependent sulfhydryl oxidase Erv1, putative
AFUA_2G04220	1.52415	2.87617	Afu2g04220 (Alt. Locus), homogentisate 1,2-dioxygenase (HmgA), putative, similar to homogentisate 1,2-dioxygenase (GI:40745906) (Aspergillus nidulans) PMID: 9417084, (1.13.11.5)
AFUA_1G12610	1.52238	2.87265	Afu1g12610 (Alt. Locus)hsp88 (Gene Name), , Hsp70 chaperone Hsp88, identical to heat shock protein Hsp88, putative (GI:42820666) (Aspergillus fumigatus) similar to Heat shock protein Hsp88 (SP:O74225) (Neurospora crassa) PMID: 9556627 [Link to Allergen Table]
AFUA_1G02620	1.52192	2.87173	Afu1g02620 (Alt. Locus), conserved hypothetical protein
AFUA_6G05020	1.52167	2.87123
AFUA_4G04580	1.51996	2.86782	Afu4g04580 (Alt. Locus), hypothetical protein
AFUA_1G13310	1.51801	2.86397	Afu1g13310 (Alt. Locus), bZIP transcription factor, putative
AFUA_3G08210	1.51779	2.86351	Afu3g08210 (Alt. Locus), conserved hypothetical protein
AFUA_2G13630	1.51574	2.85946	Afu2g13630 (Alt. Locus), aromatic aminotransferase Aro8, putative, similar to aromatic aminotransferase, expression is regulated by general control of amino acid biosynthesis; Aro8p (GI:6321236) (Saccharomyces cerevisiae), (2.6.1.-)
AFUA_2G16050	1.51551	2.859	Afu2g16050 (Alt. Locus), conserved hypothetical protein
AFUA_2G12310	1.5145	2.857	Afu2g12310 (Alt. Locus), HLH transcription factor, putative, similar to basic helix-loop-helix transcription factor Yas1p (GI:47496704) (Yarrowia lipolytica)
AFUA_5G11590	1.51392	2.85584	Afu5g11590 (Alt. Locus), glycerophosphocholine phosphodiesterase Gde1, putative, similar to PHO85 (GI:4170) (Saccharomyces cerevisiae) PMID: 3320965 PMID: 15057567 PMID: 12483553 similar to major cellular glycerophosphocholine (GroPCho) phosphodiesterase; hydrolyzes GroPCho to choline and glycerolphosphate after its uptake by Git1p permease, for use as a phosphate source and as a precursor for ph…
AFUA_6G02130	1.51201	2.85208	Afu6g02130 (Alt. Locus), Rab geranylgeranyl transferase escort protein, putative
AFUA_4G10610	1.50954	2.84719	Afu4g10610 (Alt. Locus), stress responsive A/B barrel domain protein
AFUA_2G09250	1.50942	2.84695
AFUA_4G10620	1.50795	2.84405	Afu4g10620 (Alt. Locus), 4-hydroxyphenylpyruvate dioxygenase, putative, similar to T-cell reactive protein TrcP (GI:601846) (Coccidioides posadasii) PMID: 9453590 similar to 4-hydroxyphenylpyruvate dioxygenase (Mycosphaerella graminicola) PMID: 9570125, (1.13.11.27)
AFUA_6G04820	1.50462	2.8375	Afu6g04820 (Alt. Locus), para-aminobenzoate synthase PabaA, identical to para aminobenzoic acid synthetase PabaA (GI:4885032) (Aspergillus fumigatus) PMID: 11178340, 10931287, (4.1.3.-)
AFUA_6G09360	1.50142	2.83122	Afu6g09360 (Alt. Locus), proline-glycine rich protein, putative
AFUA_2G11740	1.50047	2.82935	Afu2g11740 (Alt. Locus), mitochondrial serine protease Pim1, putative, similar to mitochondrial ATP-dependent protease involved in intramitochondrial proteolysis; involved in degradation of misfolded proteins in mitochondria; required for bigenesis and maintenance of mitochondria; Pim1p (GI:6319449) (Saccharomyces cerevisiae), (3.4.21.53)
AFUA_3G03290	1.49401	2.81671	Afu3g03290 (Alt. Locus), conserved hypothetical protein
AFUA_4G06850	1.49242	2.8136	Afu4g06850 (Alt. Locus), coenzyme A synthetase, putative, (6.2.1.3)
AFUA_6G08860	1.49241	2.81359	Afu6g08860 (Alt. Locus), sugar isomerase, KpsF/GutQ
AFUA_5G13640	1.48924	2.80741	Afu5g13640 (Alt. Locus), thioredoxin, putative
AFUA_1G14450	1.48387	2.79698	Afu1g14450 (Alt. Locus)exgO (Gene Name), , exo-beta-1,3-glucanase Exg0, identical to exo-1,3-beta-D-glucanase, ExoO (GI:44890042) (Aspergillus fumigatus) similar to glucan 1,3-beta-glucosidase GLUC78 precursor (GI:8886891) (Trichoderma atroviride), (3.2.1.58)
AFUA_5G05500	1.48355	2.79637	Afu5g05500 (Alt. Locus), D-3-phosphoglycerate dehydrogenase, (1.1.1.95)
AFUA_5G06090	1.48225	2.79385	Afu5g06090 (Alt. Locus), integral membrane protein (Ytp1), putative
AFUA_4G08810	1.47953	2.78858	Afu4g08810 (Alt. Locus), DUF757 domain protein
AFUA_3G12660	1.4795	2.78852	Afu3g12660 (Alt. Locus), C6 finger domain protein Acr-2, putative, similar to acr-2 (GI:1754596) (Neurospora crassa) PMID: 8679704
AFUA_2G15900	1.47888	2.78732	Afu2g15900 (Alt. Locus), conserved hypothetical protein
AFUA_2G04620	1.47737	2.7844	Afu2g04620 (Alt. Locus), Hsp70 chaperone BiP/Kar2, putative, similar to ER chaperone BiP (GI:5597020) (Aspergillus oryzae) similar to ATPase involved in protein import into the ER, also acts as a chaperone to mediate protein folding in the ER and may play a role in ER export of soluble proteins; regulates the unfolded protein response via interaction with Ire1p; Kar2p (Saccharomyces cerevisiae) P…
AFUA_6G05010	1.47648	2.7827	Afu6g05010 (Alt. Locus), C6 transcription factor, putative
AFUA_1G05260	1.47425	2.77839	Afu1g05260 (Alt. Locus), DNA-directed DNA polymerase theta, putative, (2.7.7.7)
AFUA_4G13090	1.47232	2.77467	Afu4g13090 (Alt. Locus), MFS transporter, putative
AFUA_8G05160	1.47193	2.77392	Afu8g05160 (Alt. Locus), peroxisomal membrane protein (Pex13), putative
AFUA_5G01290	1.47035	2.77088	Afu5g01290 (Alt. Locus), zinc-binding oxidoreductase, putative, similar to GB:AAM04212.1: NADPH:quinone reductase (Methanosarcina acetivorans C2A), (1.-.-.-)
AFUA_2G05830	1.46091	2.75282	Afu2g05830 (Alt. Locus), C6 finger domain protein, putative
AFUA_3G08550	1.45778	2.74685	Afu3g08550 (Alt. Locus), short-chain dehydrogenase/reductase family protein, putative
AFUA_4G10860	1.45416	2.73997	Afu4g10860 (Alt. Locus), conserved hypothetical protein
AFUA_5G12050	1.45347	2.73865	Afu5g12050 (Alt. Locus), DNA ligase, putative, (6.5.1.1)
AFUA_6G06630	1.45259	2.73698	Afu6g06630 (Alt. Locus), conserved hypothetical protein
AFUA_2G08650	1.45184	2.73558	Afu2g08650 (Alt. Locus), RING finger membrane protein
AFUA_5G09850	1.45031	2.73266
AFUA_5G10840	1.44917	2.73052	Afu5g10840 (Alt. Locus), ribosome biogenesis protein Urb1, putative, similar to nucleolar protein required for the normal accumulation of 25S and 5.8S rRNAs, associated with the 27SA2 pre-ribosomal particle; proposed to be involved in the biogenesis of the 60S ribosomal subunit; Urb1p (GI:6322838) (Saccharomyces cerevisiae) PMID: 15242642
AFUA_3G04060	1.44791	2.72813	Afu3g04060 (Alt. Locus), SNF7 family protein Fti1/Did2, putative, similar to Class E protein of the vacuolar protein-sorting (Vps) pathway, associates reversibly with the late endosome, has human ortholog that may be altered in breast tumors; Did2p (GI:6322887) (Saccharomyces cerevisiae)
AFUA_1G01920	1.44343	2.71966	Afu1g01920 (Alt. Locus), plasma membrane protein Pth11-like, putative, similar to integral membrane protein PTH11 (GI:4836427) (Magnaporthe grisea) PMID: 10521529
AFUA_1G14330	1.44014	2.71346	Afu1g14330 (Alt. Locus), ABC transporter, putative, Similar to PMR1 (Penicillium digitatum)(BAA31254). PMID: 9758830.
AFUA_1G02710	1.43944	2.71215	Afu1g02710 (Alt. Locus), conserved hypothetical protein
AFUA_5G06970	1.43837	2.71015	Afu5g06970 (Alt. Locus), conserved hypothetical protein
AFUA_2G00580	1.43545	2.70467	Afu2g00580 (Alt. Locus), hypothetical protein
AFUA_1G02610	1.42648	2.68791	Afu1g02610 (Alt. Locus), rRNA processing protein, putative, similar to protein required for cell viability; Yor004wp (GI:6324577) (Saccharomyces cerevisiae)
AFUA_6G03730	1.42135	2.67836	Afu6g03730 (Alt. Locus), 2-methylcitrate dehydratase, putative, (4.2.1.79)
AFUA_3G02800	1.42056	2.6769	Afu3g02800 (Alt. Locus), lipase/esterase, putative, similar to GB:AAS42164.1: lipase (Bacillus cereus ATCC 10987;)
AFUA_2G17300	1.41843	2.67295	Afu2g17300 (Alt. Locus), glutathione S-transferase
AFUA_3G14020	1.41771	2.6716	Afu3g14020 (Alt. Locus), conserved hypothetical protein
AFUA_5G13280	1.41736	2.67096	Afu5g13280 (Alt. Locus), conserved hypothetical protein
AFUA_3G08390	1.41735	2.67095	Afu3g08390 (Alt. Locus), tRNA dihydrouridine synthase (Smm1), putative, (1.-.-.-)
AFUA_6G10700	1.41698	2.67025	Afu6g10700 (Alt. Locus), chaperonin, putative
AFUA_8G01060	1.41205	2.66115	Afu8g01060 (Alt. Locus), hypothetical protein
AFUA_4G01440	1.40598	2.64998	Afu4g01440 (Alt. Locus), glutathione S-transferase family protein
AFUA_2G02530	1.40482	2.64785	Afu2g02530 (Alt. Locus), casein kinase I, putative, similar to Casein kinase I homolog hhp1 ((Swiss-Prot:P40235) (Schizosaccharomyces pombe), (2.7.1.-)
AFUA_1G13350	1.40378	2.64594	Afu1g13350 (Alt. Locus), MFS transporter, putative
AFUA_2G07650	1.40372	2.64584	Afu2g07650 (Alt. Locus), RNA binding protein, putative, (5.2.1.8)
AFUA_5G00770	1.40156	2.64187	Afu5g00770 (Alt. Locus), integral membrane protein, putative
AFUA_4G04060	1.39525	2.63034	Afu4g04060 (Alt. Locus), conserved hypothetical protein
AFUA_2G10150	1.39381	2.62772	Afu2g10150 (Alt. Locus), peroxisome biosynthesis protein (PAS1/Peroxin-1), putative
AFUA_2G12460	1.39298	2.6262	Afu2g12460 (Alt. Locus), conserved hypothetical protein
AFUA_5G06350	1.39068	2.62202	Afu5g06350 (Alt. Locus), DNA repair and transcription factor Ada, putative, (2.1.1.63)
AFUA_3G00930	1.38721	2.61573	Afu3g00930 (Alt. Locus), C6 transcription factor, putative
AFUA_6G10490	1.38469	2.61115	Afu6g10490 (Alt. Locus), conserved hypothetical protein
AFUA_1G15810	1.38466	2.6111	Afu1g15810 (Alt. Locus), RNA splicing factor (Pad-1), putative
AFUA_1G11980	1.38329	2.60863	Afu1g11980 (Alt. Locus), glutamine amidotransferase, putative
AFUA_2G10900	1.38245	2.60711	Afu2g10900 (Alt. Locus), autophagy related lipase Atg15, putative, similar to SP:P25641: Autophagy related putative lipase ATG15 (Cytoplasm tovacuole targeting protein 17) (Saccharomyces cerevisiae), (3.1.1.3)
AFUA_1G01330	1.37871	2.60035	Afu1g01330 (Alt. Locus), oxidoreductase, short-chain dehydrogenase/reductase family
AFUA_1G07730	1.37662	2.5966	Afu1g07730 (Alt. Locus), metalloprotease MEP1
AFUA_1G05680	1.3745	2.59279	Afu1g05680 (Alt. Locus), hypothetical protein
AFUA_2G00590	1.37378	2.59148	Afu2g00590 (Alt. Locus), glutathione S-transferase, putative, (2.5.1.18)
AFUA_8G01300	1.3727	2.58955	Afu8g01300 (Alt. Locus), conserved hypothetical protein
AFUA_5G09420	1.36934	2.58353	Afu5g09420 (Alt. Locus), clock controled protein (Ccg-8), putative, similar to GB:CAD70728.1: CLOCK-CONTROLLED PROTEIN 8 (ccg-8) (Neurospora crassa) PMID: 16154782
AFUA_5G10120	1.36409	2.57414	Afu5g10120 (Alt. Locus), NRPS-like enzyme, putative, similar to GB:AAO49458.1: monomodular non-ribosomal peptide synthetase Maa1 (Leptosphaeria maculans)
AFUA_1G13300	1.36327	2.57268	Afu1g13300 (Alt. Locus), GTP cyclohydrolase II, putative, similar to SP:P38066: GTP cyclohydrolase II (Saccharomyces cerevisiae), (3.5.4.25)
AFUA_7G05390	1.36196	2.57034	Afu7g05390 (Alt. Locus), mitochondrial carrier protein, putative
AFUA_6G03940	1.3601	2.56702	Afu6g03940 (Alt. Locus), GTPase activating protein (Gyp7), putative
AFUA_6G13140	1.35727	2.562	Afu6g13140 (Alt. Locus), 3,4-dihydroxy-2-butanone 4-phosphate synthase
AFUA_2G13390	1.35012	2.54933	Afu2g13390 (Alt. Locus), MFS transporter, putative
AFUA_1G15960	1.34959	2.5484	Afu1g15960 (Alt. Locus), glutathione oxidoreductase Glr1, putative, similar to cytosolic and mitochondrial glutathione oxidoreductase, converts oxidized glutathione to reduced glutathione; Glr1p (GI:6325166) (Saccharomyces cerevisiae), (1.6.4.2)
AFUA_7G05460	1.34851	2.5465	Afu7g05460 (Alt. Locus), conserved hypothetical protein
AFUA_1G17290	1.34703	2.54387	Afu1g17290 (Alt. Locus), conserved hypothetical protein
AFUA_3G07690	1.34516	2.54058	Afu3g07690 (Alt. Locus), cytochrome c oxidase copper chaperone Cox17, putative, similar to Copper metallochaperone that transfers copper to Sco1p and Cox11p for eventual delivery to cytochrome c oxidase; Cox17p (GI:6323020) (Saccharomyces cerevisiae)
AFUA_6G10010	1.34236	2.53566	Afu6g10010 (Alt. Locus), C6 transcription factor, putative
AFUA_3G09690	1.34055	2.53248	Afu3g09690 (Alt. Locus), extracellular thaumatin domain protein, putative
AFUA_5G08910	1.33857	2.529	Afu5g08910 (Alt. Locus), 3-methylcrotonyl-CoA carboxylase subunit alpha (MccA), putative, similar to 3-methylcrotonyl-CoA carboxylase biotin-containing subunit; MccA (GI:38505138) (Emericella nidulans) PMID: 14612443 similar to 3-methylcrotonyl-CoA carboxylase alpha subunit (GI:12382296) (Homo sapiens) PMID: 11170888, (6.4.1.4)
AFUA_5G00650	1.33829	2.52852	Afu5g00650 (Alt. Locus), conserved hypothetical protein
AFUA_4G08740	1.33631	2.52505	Afu4g08740 (Alt. Locus), MFS multidrug transporter, putative
AFUA_1G13150	1.33608	2.52464	Afu1g13150 (Alt. Locus), Smr domain protein
AFUA_6G08870	1.33557	2.52376	Afu6g08870 (Alt. Locus), nicotinamide mononucleotide adenylyl transferase
AFUA_8G05270	1.33452	2.52192	Afu8g05270 (Alt. Locus), C6 transcription factor, putative
AFUA_5G14950	1.33436	2.52164	Afu5g14950 (Alt. Locus), conserved serine-proline rich protein
AFUA_8G06390	1.33432	2.52157	Afu8g06390 (Alt. Locus), hypothetical protein
AFUA_8G02140	1.33424	2.52143	Afu8g02140 (Alt. Locus), ankyrin repeat protein, similar to Ankyrin 1; Erythrocyte ankyrin; Ankyrin R (Swiss-Prot:P16157) (Homo sapiens)
AFUA_4G12180	1.3274	2.50949	Afu4g12180 (Alt. Locus), C6 transcription factor Prf, putative, similar to binuclear zinc transcription factor PRF (GI:32395673) (Nectria haematococca)
AFUA_1G10800	1.32734	2.5094	Afu1g10800 (Alt. Locus), thioesterase family protein, contains a thioesterase domain
AFUA_6G07900	1.32709	2.50896	Afu6g07900 (Alt. Locus), carbon catabolite repression protein CreD, putative, similar to carbon catabolite repression protein CreD (GI:41763882) (Emericella nidulans) PMID: 15255903
AFUA_8G05660	1.32604	2.50713	Afu8g05660 (Alt. Locus), myosin I MyoA/Myo5, similar to one of two type I myosins; contains proline-rich tail homology 2 (TH2) and SH3 domains; MYO5 deletion has little effect on growth, but myo3 myo5 double deletion causes severe defects in growth and actin cytoskeleton organization; Myo5p (GI:6323756) (Saccharomyces cerevisiae)
AFUA_8G01400	1.32579	2.5067	Afu8g01400 (Alt. Locus), mitochondrial carrier protein (Pet8), putative
AFUA_4G10990	1.31854	2.49414	Afu4g10990 (Alt. Locus), transporter protein smf2
AFUA_4G06170	1.31249	2.4837	Afu4g06170 (Alt. Locus), conserved hypothetical protein
AFUA_4G03540	1.31236	2.48347	Afu4g03540 (Alt. Locus), integral membrane protein , putative
AFUA_1G11540	1.30984	2.47915
AFUA_4G10950	1.30878	2.47731	Afu4g10950 (Alt. Locus), 3-ketoacyl-coA thiolase peroxisomal A precursor, (2.3.1.9)
AFUA_7G02370	1.30791	2.47583	Afu7g02370 (Alt. Locus), SNF2 family helicase/ATPase (Swr1), putative
AFUA_6G04040	1.3062	2.4729	Afu6g04040 (Alt. Locus), peroxisomal D3,D2-enoyl-CoA isomerase, (4.2.1.17)
AFUA_3G08860	1.30453	2.47003	Afu3g08860 (Alt. Locus), transcriptional regulator, putative
AFUA_2G17110	1.30433	2.46969
AFUA_5G12220	1.30339	2.46808	Afu5g12220 (Alt. Locus), conserved hypothetical protein
AFUA_2G00930	1.30292	2.46727	Afu2g00930 (Alt. Locus), xylosidase/glycosyl hydrolase, putative, (3.2.1.-)
AFUA_3G12360	1.30167	2.46514	Afu3g12360 (Alt. Locus), conserved hypothetical protein
AFUA_2G14950	1.30025	2.46271	Afu2g14950 (Alt. Locus), exonuclease, putative, (3.1.-.-)
AFUA_1G09350	1.30002	2.46233	Afu1g09350 (Alt. Locus), transcription initiation factor TFIID subunit 13, putative
AFUA_4G06160	1.29786	2.45863	Afu4g06160 (Alt. Locus), branched-chain amino acid aminotransferase, cytosolic, (2.6.1.42)
AFUA_5G02200	1.29747	2.45798	Afu5g02200 (Alt. Locus), Mitochondrial import inner membrane translocase subunit (TIM22), putative, similar to Mitochondrial import inner membrane translocase subunit (SP:Q12328).TIM22. {Saccharomyces cerevisiae;}. PMID: 8955274
AFUA_2G02050	1.29745	2.45794	Afu2g02050 (Alt. Locus), peptidyl-prolyl cis-trans isomerase Cpr7, putative, similar to peptidyl-prolyl cis-trans isomerase (cyclophilin), catalyzes the cis-trans isomerization of peptide bonds N-terminal to proline residues; binds to Hsp82p and contributes to chaperone activity; Cpr7p (GI:6322492) (Saccharomyces cerevisiae), (5.2.1.8)
AFUA_2G05040	1.2969	2.457	Afu2g05040 (Alt. Locus), glycerol:H+ symporter (Gup1), putative, contains ten predicted transmembrane helices similar to GlcC (GI:40745772) (Aspergillus nidulans) similar to GUP1 (GI:1723878)(Saccharomyces cerevisiae) similar to MART-2 (GI:8922621)(Homo sapiens) similar to skinny hedgehog (GI:15420842) (Drosophila melanogaster) contains an MBOAT domain
AFUA_3G11400	1.2964	2.45615	Afu3g11400 (Alt. Locus)PEP2 (Gene Name), , aspartic endopeptidase Pep2, identical to cellular aspartic protease (GI:2664292) (Aspergillus fumigatus) PMID: 11043985 PMID: 9229335, (3.4.23.-)
AFUA_2G16060	1.29627	2.45592	Afu2g16060 (Alt. Locus), conserved hypothetical protein
AFUA_2G12470	1.29584	2.45519	Afu2g12470 (Alt. Locus), acetylornithine aminotransferase, (2.6.1.1)
AFUA_6G10400	1.29269	2.44984	Afu6g10400 (Alt. Locus), conserved hypothetical protein
AFUA_1G09200	1.28803	2.44195	Afu1g09200 (Alt. Locus), ribosome biogenesis protein Erb1, putative, similar to protein required for maturation of the 25S and 5.8S ribosomal RNAs; constituent of 66S pre-ribosomal particles; homologous to mammalian Bop1; Erb1p (GI:6323693) (Saccharomyces cerevisiae)
AFUA_2G11750	1.28774	2.44146	Afu2g11750 (Alt. Locus), mitochondrial DnaJ chaperone (Mdj1), putative, similar to MDJ1 protein, mitochondrial precursor (SP:P35191) (Saccharomyces cerevisiae)
AFUA_8G00720	1.28704	2.44028	Afu8g00720 (Alt. Locus), amino acid transporter, putative, similar to SP:P38680: N amino acid transport system protein, Methyltryptophan resistance protein {Neurospora crassa;}
AFUA_7G06600	1.28669	2.43967	Afu7g06600 (Alt. Locus), NADPH-dependent FMN reductase Lot6, putative, similar to putative NADPH-dependent FMN reductase with strong ferricyanide reductase activity in vitro; gene expression increases in cultures shifted to a lower temperature; Lot6p (GI:6323039) (Saccharomyces cerevisiae)
AFUA_1G12640	1.28638	2.43916	Afu1g12640 (Alt. Locus), zinc metalloproteinase, putative
AFUA_3G12150	1.28188	2.43155	Afu3g12150 (Alt. Locus), flavin containing amine oxidase, putative, (1.4.3.-)
AFUA_5G14160	1.2796	2.42771	Afu5g14160 (Alt. Locus), hypothetical protein
AFUA_5G14880	1.27865	2.42612
AFUA_4G13510	1.27576	2.42126	Afu4g13510 (Alt. Locus), isocitrate lyase AcuD, similar to GB:AAR15146.1: isocitrate lyase (Aspergillus fumigatus) similar to GB:CAA44572.1: isocitrate lyase (Emericella nidulans) PMID: 10801489, 1531185, (4.1.3.1)
AFUA_7G02290	1.27432	2.41885	Afu7g02290 (Alt. Locus), ER glycosyl hydrolase (Edem), putative, similar to ER degradation enhancer, mannosidase alpha-like Edem1 (GI:17512212) (Homo sapiens), (3.2.1.113)
AFUA_1G13100	1.27233	2.41551	Afu1g13100 (Alt. Locus), nucleoporin (Nup184), putative
AFUA_6G09070	1.2696	2.41095	Afu6g09070 (Alt. Locus), 3\'(2\'),5\'-bisphosphate nucleotidase, (3.1.3.7)
AFUA_3G13270	1.26938	2.41059	Afu3g13270 (Alt. Locus), phosphatidate cytidylyltransferase, putative, (2.7.7.41)
AFUA_1G15340	1.26897	2.40989	Afu1g15340 (Alt. Locus), poly(A) polymerase Pap, similar to Poly(A) polymerase pla1 (EC 2.7.7.19) (PAP) (Polynucleotideadenylyltransferase) (Swiss-Prot:Q10295) (Schizosaccharomyces pombe) PubMed=8692700 similar to Poly(A) polymerase (EC 2.7.7.19) (PAP) (Polynucleotideadenylyltransferase) (Swiss-Prot:P29468) (Saccharomyces cerevisiae) PubMed=1840648, (2.7.7.19)
AFUA_2G12610	1.26592	2.40481	Afu2g12610 (Alt. Locus), NADPH-adrenodoxin reductase Arh1, putative, similar to adrenodoxin reductase/ ferredoxin reductase (GI:30582207) (Homo sapiens) PMID: 2236061, 2845396, 11053423 similar to oxidoreductase of the mitochondrial inner membrane, involved in cytoplasmic and mitochondrial iron homeostasis and required for activity of Fe-S cluster-containing enzymes; one of the few mitochondrial …
AFUA_6G03750	1.26506	2.40338	Afu6g03750 (Alt. Locus), amidophosphoribosyltransferase, (2.4.2.14)
AFUA_3G09610	1.26399	2.40159	Afu3g09610 (Alt. Locus), histone acetyltransferase (MysT1), putative, similar to histone acetyltransferase MYST1 (GB:23138817) (Homo sapiens)
AFUA_8G04190	1.26228	2.39874	Afu8g04190 (Alt. Locus), conserved hypothetical protein
AFUA_2G01920	1.26193	2.39817	Afu2g01920 (Alt. Locus), glutaminyl-tRNA synthetase, (6.1.1.18)
AFUA_1G16760	1.26118	2.39691	Afu1g16760 (Alt. Locus), acetyltransferase, GNAT family family
AFUA_1G11790	1.26112	2.39683	Afu1g11790 (Alt. Locus), nucleoside hydrolase, putative, similar to uridine nucleosidase (uridine-cytidine N-ribohydrolase), cleaves N-glycosidic bonds in nucleosides; involved in recycling pyrimidine deoxy- and ribonucleosides via the pyrimidine salvage pathway; Urh1p (GI:37362635) (Saccharomyces cerevisiae), (3.2.2.-)
AFUA_1G04460	1.26014	2.39519	Afu1g04460 (Alt. Locus), lysyl-tRNA synthetase, putative, potential sequencing error, (6.1.1.6)
AFUA_5G00800	1.25959	2.39427	Afu5g00800 (Alt. Locus), conserved hypothetical protein
AFUA_6G10370	1.25928	2.39377	Afu6g10370 (Alt. Locus), RNA lariat debranching enzyme, putative, similar to RNA lariat debranching enzyme (GI:6019470) (Homo sapiens)
AFUA_5G12360	1.2571	2.39015	Afu5g12360 (Alt. Locus), mitochondrial oxaloacetate transporter (Oac), putative, similar to mitochondrial oxaloacetate transporter (SP:P32332) (Saccharomyces cerevisiae)
AFUA_3G12500	1.25678	2.38962	Afu3g12500 (Alt. Locus), conserved hypothetical protein
AFUA_6G04410	1.25454	2.38592	Afu6g04410 (Alt. Locus), DUF1183 domain protein
AFUA_2G16260	1.25095	2.37999	Afu2g16260 (Alt. Locus), microtubule associated protein (Ase1), putative
AFUA_5G06060	1.25029	2.37889	Afu5g06060 (Alt. Locus), sulfur metabolism regulator SkpA, putative
AFUA_5G06000	1.24874	2.37634	Afu5g06000 (Alt. Locus), SET and WW domain protein
AFUA_8G04970	1.24854	2.37601	Afu8g04970 (Alt. Locus), conserved hypothetical protein
AFUA_7G03820	1.2475	2.37429	Afu7g03820 (Alt. Locus), DNA excision repair protein Rad16, putative, similar to protein that recognizes and binds damaged DNA in an ATP-dependent manner (with Rad7p) during nucleotide excision repair; subunit of Nucleotide Excision Repair Factor 4 (NEF4); member of the SWI/SNF family; Rad16p (GI:6319590) (Saccharomyces cerevisiae)
AFUA_7G05530	1.24729	2.37395	Afu7g05530 (Alt. Locus), DEAD/DEAH box helicase, putative, (3.6.1.-)
AFUA_5G07250	1.24563	2.37123	Afu5g07250 (Alt. Locus), DUF300 domain protein, putative
AFUA_3G05820	1.24558	2.37114	Afu3g05820 (Alt. Locus), ZZ type zinc finger domain protein
AFUA_8G04400	1.23901	2.36036	Afu8g04400 (Alt. Locus), RNA binding protein, putative
AFUA_4G00980	1.23846	2.35947	Afu4g00980 (Alt. Locus), conserved hypothetical protein
AFUA_4G09050	1.23637	2.35605	Afu4g09050 (Alt. Locus), serine/threonine protein kinase (Pdd7p), putative, similar to autophagy serine/threonine-protein kinase APG1 (Swiss-Prot:P53104) (Saccharomyces cerevisiae)
AFUA_1G06480	1.23635	2.35601	Afu1g06480 (Alt. Locus), conserved hypothetical protein
AFUA_2G14150	1.23173	2.34849	Afu2g14150 (Alt. Locus), endo-arabinanase, putative
AFUA_4G08460	1.231	2.34729	Afu4g08460 (Alt. Locus), conserved hypothetical protein
AFUA_6G04950	1.23009	2.34582	Afu6g04950 (Alt. Locus), mitochondrial GTPase (Mss1), putative, similar to GTPase MSS1, mitochondrial precursor (P32559) (Saccharomyces cerevisiae)
AFUA_4G07220	1.22773	2.34198	Afu4g07220 (Alt. Locus), KH domain protein
AFUA_1G04240	1.2263	2.33966	Afu1g04240 (Alt. Locus), small nucleolar ribonucleoprotein complex subunit Utp14, putatrive
AFUA_5G01620	1.22551	2.33838	Afu5g01620 (Alt. Locus), extracellular proline-rich protein
AFUA_4G06780	1.22544	2.33826	Afu4g06780 (Alt. Locus), mitochondrial carrier protein, putative
AFUA_2G16330	1.2216	2.33205	Afu2g16330 (Alt. Locus), glucokinase, putative, (2.7.1.2)
AFUA_6G08460	1.22141	2.33174	Afu6g08460 (Alt. Locus), cytochrome P450 alkane hydroxylase, putative, (1.14.14.-)
AFUA_1G14910	1.21783	2.32597	Afu1g14910 (Alt. Locus), endosomal SPRY domain protein, putative, similar to endosomal protein of unknown function, mRNA is targeted to the bud via the mRNA transport system involving She2p; Ymr171cp (GI:6323823) (Saccharomyces cerevisiae)
AFUA_1G13180	1.21712	2.32482	Afu1g13180 (Alt. Locus), mitochondrial outer membrane protein (Sam35), putative, similar to essential component of the sorting and assembly machinery (SAM complex, aka TOB complex) of the mitochondrial outer membrane; Sam35p (GI:6321875) (Saccharomyces cerevisiae)
AFUA_8G02700	1.21657	2.32394	Afu8g02700 (Alt. Locus), repressor protein
AFUA_4G07430	1.21589	2.32284	Afu4g07430 (Alt. Locus), UBX domain protein, putative
AFUA_6G12540	1.21172	2.31613	Afu6g12540 (Alt. Locus), RING finger protein
AFUA_7G01410	1.21138	2.31559	Afu7g01410 (Alt. Locus), UPF0183 domain protein
AFUA_3G05970	1.21132	2.3155	Afu3g05970 (Alt. Locus), eukaryotic translation initiation factor subunit eIF2A, putative, similar to GB:AAH11885.1: eIF2A protein (Homo sapiens)
AFUA_2G15440	1.211	2.31498	Afu2g15440 (Alt. Locus), integral membrane protein, putative
AFUA_7G04200	1.21027	2.31381	Afu7g04200 (Alt. Locus), conserved hypothetical protein
AFUA_6G06670	1.20674	2.30815	Afu6g06670 (Alt. Locus), conserved hypothetical protein
AFUA_5G13470	1.20564	2.3064	Afu5g13470 (Alt. Locus), 60S acidic ribosomal protein P0, putative
AFUA_5G07310	1.20464	2.30481	Afu5g07310 (Alt. Locus), DUF500 domain protein
AFUA_8G04900	1.20403	2.30382	Afu8g04900 (Alt. Locus), conserved hypothetical protein
AFUA_6G02200	1.20386	2.30355	Afu6g02200 (Alt. Locus), C2HC5 finger protein, similar to thyroid receptor interactor (GI:703112) (Homo sapiens)
AFUA_1G09730	1.20327	2.30261	Afu1g09730 (Alt. Locus), PAP2 domain protein, (3.-.-.-)
AFUA_3G12140	1.19884	2.29556	Afu3g12140 (Alt. Locus), conserved hypothetical protein
AFUA_1G05440	1.19842	2.29489	Afu1g05440 (Alt. Locus), UDP-Glc/Gal endoplasmic reticulum nucleotide sugar transporter
AFUA_4G06350	1.19727	2.29306	Afu4g06350 (Alt. Locus), ribosomal biogenesis protein Gar2, similar to Protein gar2 (Swiss-Prot:P41891) (Schizosaccharomyces pombe) PubMed=7596817
AFUA_8G04130	1.19726	2.29304	Afu8g04130 (Alt. Locus), C6 transcription factor (Ctf1B), putative, similar to cutinase transcription factor 1, CTF1-beta (GI:1706177) (Nectria haematococca)
AFUA_3G07360	1.19696	2.29256	Afu3g07360 (Alt. Locus), mitochondrial metallochaperone Sco1, putative
AFUA_1G14830	1.19574	2.29062	Afu1g14830 (Alt. Locus), conserved hypothetical protein
AFUA_4G07570	1.19545	2.29016	Afu4g07570 (Alt. Locus), 60S ribosome biogenesis protein Mak11, putative, similar to protein essential for cell growth and replication of M dsRNA virus; contains four beta-transducin repeats; Mak11p (GI:6322831) (Saccharomyces cerevisiae) PMID: 2826479
AFUA_2G16290	1.19529	2.28991	Afu2g16290 (Alt. Locus), DnaJ domain protein (Mas5), putative, similar to Mas5p (SP:P25491) (Saccharomyces cerevisiae) PMID: 1729605
AFUA_3G06380	1.1951	2.28961	Afu3g06380 (Alt. Locus), exosome-associated family protein
AFUA_3G00960	1.19451	2.28867	Afu3g00960 (Alt. Locus), conserved hypothetical protein
AFUA_7G00770	1.19292	2.28614	Afu7g00770 (Alt. Locus), C6 transcription factor, putative
AFUA_2G04770	1.19145	2.28382	Afu2g04770 (Alt. Locus), autophagy protein Atg13, putative, similar to YPR185w APG13 protein required for the autophagic process (gi|61211715) (Saccharomyces cerevisiae)
AFUA_4G08760	1.19133	2.28364	Afu4g08760 (Alt. Locus), phospho-2-dehydro-3-deoxyheptonate aldolase, class II, (4.1.2.15)
AFUA_5G02250	1.18064	2.26678	Afu5g02250 (Alt. Locus), conserved hypothetical protein
AFUA_3G01850	1.17919	2.2645	Afu3g01850 (Alt. Locus), porphyromonas-type peptidyl-arginine deiminase superfamily
AFUA_6G07440	1.17403	2.25641	Afu6g07440 (Alt. Locus), 1-phosphatidylinositol-3-phosphate 5-kinase (Fab1), putative, similar to phosphatidylinositol-3-phosphate 5-kinase, FAB1 (P34756) (Saccharomyces cerevisiae), (2.7.1.150)
AFUA_3G12670	1.17304	2.25486	Afu3g12670 (Alt. Locus), serine/threonine protein kinase, putative
AFUA_6G09930	1.1708	2.25136	Afu6g09930 (Alt. Locus), bZIP transcription factor AP-1/Yap1, putative, similar to transcription factor Cap1 (GI:4100263) (Candida albicans) similar to basic leucine zipper (bZIP) transcription factor required for oxidative stress tolerance; mediates pleiotropic drug and metal resistance; localized to the nucleus in response to the presence of oxidants; Yap1p (GI:6323636) (Saccharomyces cerevisia…
AFUA_2G08370	1.1696	2.2495	Afu2g08370 (Alt. Locus), glutathione S-transferase, putative, (2.5.1.-)
AFUA_3G11500	1.16919	2.24886	Afu3g11500 (Alt. Locus), LipA and NB-ARC domain protein, SesB-like signaling protein, putative, similar to SesB (GI:46102477) (Nectria haematococca) PMID: 15312233 similar to disease resistance protein (CC-NBS-LRR class) (GI:15217954) (Arabidopsis thaliana) contains LipA and NB-ARC domains
AFUA_6G07880	1.16898	2.24852	Afu6g07880 (Alt. Locus), DUF500 and SH3 domain protein
AFUA_4G04530	1.1679	2.24685	Afu4g04530 (Alt. Locus), short chain dehydrogenase/reductase (Ayr1), putative, similar to NADPH-dependent 1-acyl dihydroxyacetone phosphate reductase found in lipid particles, ER, and mitochondrial outer membrane; involved in phosphatidic acid biosynthesis; required for spore germination; capable of metabolizing steroid hormones; Ayr1p (GI:6322067) (Saccharomyces cerevisiae), (1.-.-.-)
AFUA_4G12500	1.16756	2.24632	Afu4g12500 (Alt. Locus), conserved hypothetical protein
AFUA_8G01710	1.1668	2.24513	Afu8g01710 (Alt. Locus), antigenic thaumatin domain protein, putative, similar to thaumatin-like pathogenesis-related protein 1 (GI:1710783) (Avena sativa)
AFUA_3G13080	1.16491	2.2422	Afu3g13080 (Alt. Locus), conserved hypothetical protein
AFUA_6G10310	1.16483	2.24206	Afu6g10310 (Alt. Locus), conserved hypothetical protein
AFUA_2G11510	1.1636	2.24016	Afu2g11510 (Alt. Locus), nucleolar GTP-binding protein (Nog1), putative, similar to nucleolar GTP-binding protein 1; Nog1 (SP:Q02892) (Saccharomyces cerevisias)
AFUA_2G15670	1.16048	2.23533	Afu2g15670 (Alt. Locus), conserved hypothetical protein
AFUA_6G05350	1.16006	2.23467	Afu6g05350 (Alt. Locus), aspartic-type endopeptidase (OpsB), putative, similar to aspartic protease opsB; oryzapsin B (GI:21392382) (Aspergillus oryzae), (3.4.23.-)
AFUA_1G01680	1.15998	2.23454	Afu1g01680 (Alt. Locus), branched-chain amino acid aminotransferase, (2.6.1.42)
AFUA_5G13040	1.15951	2.23381	Afu5g13040 (Alt. Locus), translation initiation factor eif-2b delta subunit
AFUA_6G12590	1.15893	2.23291	Afu6g12590 (Alt. Locus), hypothetical protein
AFUA_6G09010	1.15841	2.23211	Afu6g09010 (Alt. Locus), U1 snRNP splicing complex subunit (Luc7), putative, similar to living Under Cap-binding complex expression; Luc7p (GI:6320116) (Saccharomycea cerevisiae)
AFUA_5G12580	1.15801	2.23149	Afu5g12580 (Alt. Locus), GTP binding protein (GTPBP1), putative, similar to GTPBP1 (GI:47678533) (Homo sapiens)
AFUA_5G12120	1.15789	2.23131	Afu5g12120 (Alt. Locus), autophagy protein Apg16, putative, similar to TipD (GI:2407788) (Dictyostelium discoideum) PMID: 10402673 similar to Atg16p (GI:6323811) (Saccharomyces cerevisiae)
AFUA_2G16910	1.15778	2.23114	Afu2g16910 (Alt. Locus), nuclear protein SDK3, putative
AFUA_6G13530	1.15695	2.22985	Afu6g13530 (Alt. Locus), UPF0023 family protein
AFUA_4G06750	1.15287	2.22355	Afu4g06750 (Alt. Locus)sepH (Gene Name), , serine-threonine kinase SepH, similar to septation (GI:6531993) (Aspergillus nidulans) PMID: 11679062 similar to SP:P41892: cell division control protein CDC7 (Schizosaccharomyces pombe) PMID: 8039497, (2.7.1.-)
AFUA_1G09670	1.15149	2.22143	Afu1g09670 (Alt. Locus), HLH transcription factor (GlcD gamma), putative, similar to GLCD gamma (GI:12232024) (Aspergillus nidulans) [Link to Allergen Table]
AFUA_5G09200	1.15	2.21914	Afu5g09200 (Alt. Locus), ubiquitin conjugating enzyme (UbcC), putative, (6.3.2.19)
AFUA_7G05210	1.14986	2.21892	Afu7g05210 (Alt. Locus), CTP synthase, putative, (6.3.4.2)
AFUA_2G14510	1.14821	2.21639	Afu2g14510 (Alt. Locus), conserved hypothetical protein
AFUA_7G05310	1.14589	2.21282	Afu7g05310 (Alt. Locus), splicing factor u2af large subunit
AFUA_8G04230	1.14581	2.2127	Afu8g04230 (Alt. Locus), conserved hypothetical protein
AFUA_6G11740	1.14543	2.21212	Afu6g11740 (Alt. Locus), nucleoside-diphosphate-sugar epimerase family protein
AFUA_7G04150	1.14432	2.21043	Afu7g04150 (Alt. Locus), cochaperone Pam16, similar to constituent of the mitochondrial import motor associated with the presequence translocase, along with Ssc1p, Tim44p, Mge1p, and Pam18p; has similarity to J-domain containing proteins; Pam16p (GI:6322357) (Saccharomyces cerevisiae) PMID: 14981506
AFUA_5G06040	1.14381	2.20964	Afu5g06040 (Alt. Locus), UV excision repair protein (RadW), putative, similar to UV excision repair protein RAD23 homolog B; HHR23B (Swiss-Prot:P54727) (Homo sapiens) similar to UV excision repair protein RAD23 (Swiss-Prot:P32628) (Saccharomyces cerevisiae)
AFUA_2G00980	1.14317	2.20865	Afu2g00980 (Alt. Locus), conserved hypothetical protein
AFUA_2G10790	1.14283	2.20814
AFUA_1G09770	1.14203	2.20692	Afu1g09770 (Alt. Locus), La domain family
AFUA_1G10360	1.142	2.20687	Afu1g10360 (Alt. Locus), conserved hypothetical protein
AFUA_1G04210	1.14153	2.20615
AFUA_3G09040	1.14044	2.20449	Afu3g09040 (Alt. Locus), conserved hypothetical protein
AFUA_2G04840	1.13892	2.20216	Afu2g04840 (Alt. Locus), BSD domain protein, contains a BSD domain similar to DOS2 (GI:6320273) (Saccharomyces cerevisiae)
AFUA_5G13710	1.13717	2.19949	Afu5g13710 (Alt. Locus), carboxylesterase, putative, (3.1.1.-)
AFUA_1G14700	1.13676	2.19886	Afu1g14700 (Alt. Locus), MFS allantoate transporter, putative
AFUA_8G06160	1.13553	2.19699	Afu8g06160 (Alt. Locus), conserved hypothetical protein
AFUA_8G04510	1.13329	2.19359
AFUA_7G06100	1.13079	2.18978	Afu7g06100 (Alt. Locus), acyl-CoA dehydrogenasea family protein, (1.3.3.6)
AFUA_1G06890	1.12943	2.18772	Afu1g06890 (Alt. Locus), alpha-1,2-mannosyltransferase (Alg11), putative, similar to alpha-1,2-mannosyltransferase, Alg11p (GI:6324280) (Saccharomyces cerevisiae) PMID: 11278778, (2.4.1.-)
AFUA_7G01230	1.1276	2.18496	Afu7g01230 (Alt. Locus), DnaJ domain protein
AFUA_4G12680	1.12685	2.18382
AFUA_3G06950	1.12654	2.18335	Afu3g06950 (Alt. Locus), mitochondrial carrier protein (Rim2), putative
AFUA_8G05420	1.1261	2.18268	Afu8g05420 (Alt. Locus), conserved hypothetical protein
AFUA_2G05440	1.12508	2.18113	Afu2g05440 (Alt. Locus), conserved hypothetical protein
AFUA_2G00770	1.12317	2.17825	Afu2g00770 (Alt. Locus), salicylate hydroxylase, (1.14.13.1)
AFUA_5G07050	1.12093	2.17487	Afu5g07050 (Alt. Locus), proteasome regulatory particle subunit Rpt2, putative, similar to 26S protease regulatory subunit 4 homolog; TAT-binding homolog 5 (SP:P40327) (Saccharomyces cerevisiae)
AFUA_2G02710	1.12061	2.1744	Afu2g02710 (Alt. Locus), 60S ribosomal protein L24b
AFUA_5G08390	1.12048	2.17419	Afu5g08390 (Alt. Locus), response regulator, putative
AFUA_3G11870	1.11912	2.17215	Afu3g11870 (Alt. Locus), F-box and WD40 domain protein, putative, similar to F-box protein FBW7 (GI:14280321) (Homo sapiens)
AFUA_3G08030	1.11893	2.17186	Afu3g08030 (Alt. Locus), tRNA (guanine) methyltransferase Trm5, similr to tRNA(m(1)G37)methyltransferase, methylates a tRNA base adjacent to the anticodon that has a role in prevention of frameshifting; highly conserved across Archaea, Bacteria, and Eukarya; Trm5p (Saccharomyces cerevisiae)
AFUA_8G02760	1.11872	2.17154	Afu8g02760 (Alt. Locus), mitochondrial ornithine carrier protein AmcA/Ort1, putative, similar to mitochondrial carrier AmcA (GI:17062083) (Emericella nidulans) PMID: 11555288 similar to ornithine transporter of the mitochondrial inner membrane, exports ornithine from mitochondria as part of arginine biosynthesis; human ortholog is associated with hyperammonaemia-hyperornithinaemia homocitrullinur…
AFUA_3G12820	1.11865	2.17143	Afu3g12820 (Alt. Locus), kinesin family protein
AFUA_7G02600	1.11861	2.17138	Afu7g02600 (Alt. Locus), conserved hypothetical protein
AFUA_5G14080	1.11784	2.17021	Afu5g14080 (Alt. Locus), conserved hypothetical protein
AFUA_6G11410	1.11781	2.17017	Afu6g11410 (Alt. Locus)mre11 (Gene Name), , meiotic recombination protein Mre11, similar to GB:AAN78297.1: meiotic recombination protein {Emericella nidulans;} similar to GB:AAB61454.1: Mre11p {Saccharomyces cerevisiae;}
AFUA_5G04320	1.1155	2.1667	Afu5g04320 (Alt. Locus), secretion related GTPase SrgB/Ypt1, similar to secretion related GTPase (SrgB) (GI:11558649) (Aspergillus niger) PMID: 11489135 similar to Ras-related protein ypt1 (Swiss-Prot:P11620) (Schizosaccharomyces pombe)
AFUA_3G13890	1.11491	2.16581	Afu3g13890 (Alt. Locus), conserved hypothetical protein
AFUA_7G05910	1.11249	2.16219	Afu7g05910 (Alt. Locus), purine permease, putative
AFUA_2G16780	1.11148	2.16067	Afu2g16780 (Alt. Locus), DDT domain protein
AFUA_5G12400	1.11082	2.15969	Afu5g12400 (Alt. Locus), conserved hypothetical protein
AFUA_4G07160	1.10991	2.15832	Afu4g07160 (Alt. Locus), ATP dependent RNA helicase (Dob1), putative, (3.6.1.-)
AFUA_5G03320	1.10913	2.15715	Afu5g03320 (Alt. Locus), TFIIH complex helicase Ssl2, putative, similar to factor TFIIH, has DNA-dependent ATPase/helicase activity and is required, with Rad3p, for unwinding promoter DNA; involved in DNA repair; homolog of human ERCC3 (GI:6322048) (Saccharomyces cerevisiae).
AFUA_4G01510	1.10782	2.1552	Afu4g01510 (Alt. Locus), C6 transcription factor, putative
AFUA_2G06070	1.10631	2.15295	Afu2g06070 (Alt. Locus), mRNA splicing factor (Prp1/Zer1), putative, similar to re-mRNA splicing factor Prp1p/Zer1p (GI:19112878) (Schizosaccharomyces pombe) contains TPR and HAT repeats
AFUA_4G00970	1.10544	2.15165	Afu4g00970 (Alt. Locus), IMP-specific 5\'-nucleotidase (Isn1), putative, similar to IMP-specific 5\'-nucleotidase; YOR155c (GI:6324729) (Saccharomyces cerevisiae) PMID: 12735798
AFUA_6G08230	1.10411	2.14966	Afu6g08230 (Alt. Locus), mitochondrial import protein Zim17, putative, contains a DNL zinc finger similar to essential component of the mitochondrial import system; zinc finger protein that may act with Pam18p to facilitate recognition and folding of imported proteins by Ssc1p (mtHSP70) in the mitochondrial matrix; Zim17p (GI:6324019) (Saccharomyces cerevisiae)
AFUA_2G01480	1.1041	2.14965	Afu2g01480 (Alt. Locus), 60S ribosomal subunit biogenesis protein Nop16, putative, similar to constituent of 66S pre-ribosomal particles, involved in 60S ribosomal subunit biogenesis; Nop16p (GI:6320838) (Saccharomyces cerevisiae)
AFUA_6G07300	1.10235	2.14705	Afu6g07300 (Alt. Locus), mRNA splicing factor (Prp17), putative, similar to pre-mRNA splicing factor PRP17; Cell division cycle 40 homolog (SP:Q9DC48) (Mus musculus)
AFUA_2G04230	1.10115	2.14526	Afu2g04230 (Alt. Locus), fumarylacetoacetate hydrolase FahA, similar to fumarylacetoacetate hydrolase FahA (GI:1130507) (Emericella nidulans), (3.7.1.2)
AFUA_1G15050	1.1007	2.14459
AFUA_6G08770	1.10018	2.14381	Afu6g08770 (Alt. Locus), ankyrin repeat protein, contains Ankyrin repeats
AFUA_6G08250	1.09962	2.14298	Afu6g08250 (Alt. Locus), CwfJ domain protein, contains a CwfJ domain
AFUA_4G06830	1.09946	2.14274	Afu4g06830 (Alt. Locus), SUMO conjugating enzyme (UbcI), putative, similar to ubiquitin conjugating enzyme Hus5 (GI:19114116) (Schizosaccharomyces pombe), (6.3.2.-)
AFUA_2G17200	1.09797	2.14053	Afu2g17200 (Alt. Locus), conserved hypothetical protein
AFUA_5G02740	1.09775	2.14021	Afu5g02740 (Alt. Locus), alpha-1,2-mannosyltransferase (Ktr4), putative, similar to KTR4 (GI:6319676) (Saccharomyces cerevisiae), (2.4.1.131)
AFUA_3G04070	1.09693	2.13899	Afu3g04070 (Alt. Locus), bZIP transcription factor HacA, similar to transcription factor HacA (GI:20330485) (Emericella nidulans) similar to bZIP transcription factor (ATF/CREB1 homolog) that regulates the unfolded protein response, via UPRE binding, and membrane biogenesis; ER stress-induced splicing pathway utilizing Ire1p, Trl1p and Ada5p facilitates efficient Hac1p synthesis; Hac1p (GI:143184…
AFUA_3G07590	1.0968	2.1388	Afu3g07590 (Alt. Locus), ER-Golgi SNARE complex subunit (Sed5), putative
AFUA_1G06220	1.09467	2.13564	Afu1g06220 (Alt. Locus), ATP-dependent RNA helicase , putative
AFUA_2G01790	1.09411	2.13481	Afu2g01790 (Alt. Locus), conserved serine proline-rich protein, C2 and Extensin domain protein, similar to rotein required for cell viability; Ynl152wp (GI:6324177) (Saccharomyces cerevisiae)
AFUA_8G05670	1.09308	2.13329	Afu8g05670 (Alt. Locus), OPA3 domain protein, contains an OPA3 domain
AFUA_2G01980	1.08899	2.12725	Afu2g01980 (Alt. Locus), nuclear protein (Sgd1), putative
AFUA_2G06250	1.08893	2.12716
AFUA_1G16380	1.08779	2.12547	Afu1g16380 (Alt. Locus), molybdopterin cofactor biosynthetic protein
AFUA_4G07580	1.0852	2.12166	Afu4g07580 (Alt. Locus), translation initiation factor EF-2 gamma subunit, putative, similar to subunit gamma of translational initiation factor eIF2 (SP:P32481) (Saccharomyces cerevisiae)
AFUA_4G12880	1.08231	2.11743	Afu4g12880 (Alt. Locus), conserved hypothetical protein
AFUA_2G13570	1.08133	2.11598	Afu2g13570 (Alt. Locus), ribosome biogenesis protein (Bms1), putative, similar to ribosome biogenesis protein BMS1 (SP:Q08965) (Saccharomyces cerevisiae)
AFUA_7G01640	1.08091	2.11537	Afu7g01640 (Alt. Locus), C6 transcription factor (War1), putative, similar to homodimeric Zn2Cys6 zinc finger transcription factor; binds to a weak acid response element to induce transcription of PDR12 and FUN34, encoding an acid transporter and a putative ammonia transporter, respectively; War1p (GI:6323564) (Saccharomyces cerevisiae)
AFUA_4G13070	1.0796	2.11345	Afu4g13070 (Alt. Locus), alpha/beta hydrolase, putative, (3.7.1.-)
AFUA_1G11560	1.07855	2.11191	Afu1g11560 (Alt. Locus), 4-hydroxyphenylpyruvate dioxygenase, putative, (4.2.1.-)
AFUA_1G06720	1.07851	2.11185	Afu1g06720 (Alt. Locus), histone acetyltransferase Spt10, putative, (2.3.1.-)
AFUA_3G01100	1.07657	2.10901	Afu3g01100 (Alt. Locus), C2H2 finger domain protein, putative
AFUA_2G09240	1.07648	2.10888	Afu2g09240 (Alt. Locus), F-box protein (Pof7), putative
AFUA_1G15200	1.07549	2.10744	Afu1g15200 (Alt. Locus), Hsp70 family protein
AFUA_5G09260	1.07353	2.10458	Afu5g09260 (Alt. Locus), phosphatidylinositol transporter, putative
AFUA_2G00780	1.07326	2.10418	Afu2g00780 (Alt. Locus), MFS multidrug transporter, putative
AFUA_6G13210	1.07041	2.10002	Afu6g13210 (Alt. Locus), oxidoreductase, short-chain dehydrogenase/reductase family, similar to GB:AAK22385.1: oxidoreductase, short-chain dehydrogenase/reductase family (Caulobacter crescentus CB15)
AFUA_2G05380	1.06897	2.09794
AFUA_3G07740	1.06891	2.09785	Afu3g07740 (Alt. Locus), conserved hypothetical protein
AFUA_1G13740	1.06879	2.09767	Afu1g13740 (Alt. Locus), pentafunctional polypeptide (AroM), putative, similar to pentafunctional arom protein, catalyzes steps 2 through 6 in the biosynthesis of chorismate, which is a precursor to aromatic amino acids; Aro1p (GI:6320332) (Saccharomyces cerevisiae), (1.1.1.25)
AFUA_4G11830	1.06746	2.09574	Afu4g11830 (Alt. Locus), cell cycle control protein (Cwf19), putative
AFUA_6G12440	1.06743	2.0957	Afu6g12440 (Alt. Locus), conserved hypothetical protein
AFUA_2G13480	1.06349	2.08998	Afu2g13480 (Alt. Locus), conserved hypothetical protein
AFUA_2G12450	1.06301	2.08928	Afu2g12450 (Alt. Locus), hydroxymethylglutaryl-CoA lyase, (4.1.3.4)
AFUA_6G02150	1.06183	2.08758	Afu6g02150 (Alt. Locus), signal peptide peptidase, putative
AFUA_1G15950	1.06089	2.08622	Afu1g15950 (Alt. Locus), MAP kinase kinase (Pbs2), putative, (2.7.1.-)
AFUA_5G11300	1.06084	2.08614	Afu5g11300 (Alt. Locus), extracellular OTU-like cysteine protease, putative
AFUA_4G11240	1.05998	2.0849	Afu4g11240 (Alt. Locus), alpha-aminoadipate reductase large subunit, putative, similar to alpha-aminoadipate reductase Lys2 (GI:22080764) (Kluyveromyces lactis), (1.2.1.31)
AFUA_1G00420	1.05963	2.0844	Afu1g00420 (Alt. Locus), carboxypeptidase S1, putative, similar to carboxypeptidase S1, CPS1 (P34946) (Penicillium janthinellum) PMID: 8224168 similar to carboxypeptidase Y, CBPY (P00729) (Saccharomyces cerevisiae) putative pseudogene, (3.4.16.-)
AFUA_4G08510	1.05942	2.08409	Afu4g08510 (Alt. Locus), mRNA capping nucleoside-triphosphatase, putative, similar to RNA 5\'\'\'\'-triphosphatase; involved in mRNA capping (GI:7708583) (Schizosaccharomyces pombe)
AFUA_3G11220	1.05932	2.08395	Afu3g11220 (Alt. Locus), ribonuclease T2 family, putative, similar to Ribonuclease Trv (Swiss-Prot:P24657) (Trichoderma viride) PubMed=1794979 similar to Ribonuclease T2 precursor (Swiss-Prot:P10281) (Aspergillus oryzae) PubMed=2298207, (3.1.27.1)
AFUA_5G14060	1.05899	2.08347	Afu5g14060 (Alt. Locus), Rho GTPase Rho4, putative
AFUA_4G03180	1.05777	2.08171	Afu4g03180 (Alt. Locus), nuclear envelope protein Brr6, putative, similar to essential nuclear envelope integral membrane protein required for nuclear transport; depletion alters nucleoporin distribution and nuclear envelope morphology, suggesting a role in the spatial organization of nuclear pores; Brr6p (GI:6321190) (Saccharomyces cerevisiae)
AFUA_4G09190	1.0577	2.08161	Afu4g09190 (Alt. Locus), S-adenosyl-methionine-sterol-C- methyltransferas, (2.1.1.41)
AFUA_4G03360	1.05769	2.0816	Afu4g03360 (Alt. Locus), GPI anchored protein, putative
AFUA_1G06190	1.05725	2.08096	Afu1g06190 (Alt. Locus), histone H4 arginine methyltransferase RmtA, similar to RmtA (GI:33304622) (Emericella nidulans) PMID: 15311944
AFUA_5G03090	1.05707	2.08071	Afu5g03090 (Alt. Locus), small nucleolar ribonucleoprotein complex subunit (Pwp2), putative, periodic tryptophan protein 2, Similar to periodic tryptophan protein 2 (SP:P25635) (Saccharomyces cerevisiae)
AFUA_6G07910	1.05699	2.08058	Afu6g07910 (Alt. Locus), PH domain protein
AFUA_3G05630	1.0568	2.08031	Afu3g05630 (Alt. Locus), phospholipase D1 (PLD1), putative, (3.1.4.4)
AFUA_2G09490	1.05654	2.07994	Afu2g09490 (Alt. Locus), eukaryotic translation initiation factor subunit eIF-4F, putative, similar to eukaryotic initiation factor 4F subunit p130 (P39936) (Saccharomyces cerevisiae)
AFUA_6G02730	1.05577	2.07882	Afu6g02730 (Alt. Locus), MFS transporter, putative
AFUA_3G12650	1.05544	2.07835	Afu3g12650 (Alt. Locus), conserved hypothetical protein
AFUA_6G09960	1.05479	2.07742	Afu6g09960 (Alt. Locus), conserved hypothetical protein
AFUA_2G16620	1.05444	2.07691	Afu2g16620 (Alt. Locus), protein kinase, putative
AFUA_3G02380	1.05358	2.07567	Afu3g02380 (Alt. Locus), U2 auxiliary factor small subunit, putative
AFUA_8G01930	1.05334	2.07533	Afu8g01930 (Alt. Locus), methyltransferase LaeA-like, putative, similar to GB:AAO34671.1: methyltransferase (Gibberella zeae) similar to GB:AAR01218.1: LaeA (Aspergillus fumigatus)
AFUA_4G11320	1.05315	2.07506	Afu4g11320 (Alt. Locus), conserved hypothetical protein
AFUA_6G14210	1.05304	2.0749	Afu6g14210 (Alt. Locus), ubiquitin conjugating enzyme (UbcB), putative, similar to mutagenic DNA-repair protein UvsJ (GI:16604264) (Aspergillus nidulans) similar to ubiquitin conjugating enzyme RAD6; UBC2 (P06104) (Saccharomyces cerevisiae), (6.3.2.19)
AFUA_5G07620	1.05289	2.07468	Afu5g07620 (Alt. Locus), DUF1212 domain membrane protein, contains a DUF1212 domain
AFUA_4G11330	1.05075	2.07161	Afu4g11330 (Alt. Locus), Aha1 domain family
AFUA_4G03470	1.04944	2.06973	Afu4g03470 (Alt. Locus), tannase, putative, (3.1.1.20)
AFUA_7G02080	1.04936	2.06961	Afu7g02080 (Alt. Locus), RNA polymerase I subunit Rpa43, putative
AFUA_3G02920	1.04873	2.0687	Afu3g02920 (Alt. Locus), C6 transcription factor, putative
AFUA_2G16360	1.04862	2.06855	Afu2g16360 (Alt. Locus), DRAP deaminase (Rib2), putative, similar to DRAP deaminase RIB2 (GI:642221) (Saccharomyces cerevisiae) PMID: 12651014, (4.2.1.70)
AFUA_5G12640	1.04728	2.06663	Afu5g12640 (Alt. Locus), DNA polymerase gamma
AFUA_1G12475	1.04727	2.06661	Afu1g12475 (Alt. Locus), conserved hypothetical protein
AFUA_7G03690	1.04714	2.06643	Afu7g03690 (Alt. Locus), G-patch RNA maturation protein (Gno1), putative
AFUA_2G01670	1.04645	2.06544	Afu2g01670 (Alt. Locus), FHA domain protein
AFUA_1G16350	1.04558	2.0642	Afu1g16350 (Alt. Locus), hypothetical protein
AFUA_5G12270	1.04548	2.06406	Afu5g12270 (Alt. Locus), rRNA processing protein (Ebp2), putative
AFUA_1G12550	1.04368	2.06148	Afu1g12550 (Alt. Locus), membrane-tethered transcription factor (SPT23), putative, similar to SPT23 protein (SP:P35210) (Saccharomyces cerevisiae)
AFUA_4G07540	1.04271	2.06009	Afu4g07540 (Alt. Locus), small nucleolar ribonucleoprotein complex subunit, putative, Similar to PIR:S51445: probable membrane protein YLR222c - yeast (Saccharomyces cerevisiae) identified as U3 snoRNP protein at SGD.
AFUA_3G08710	1.04086	2.05745	Afu3g08710 (Alt. Locus), protein kinase domain-containing protein
AFUA_4G03990	1.03911	2.05496	Afu4g03990 (Alt. Locus), membrane-spanning ATPase, putative
AFUA_1G09690	1.03839	2.05394	Afu1g09690 (Alt. Locus), tRNA ligase
AFUA_1G10230	1.0378	2.05309	Afu1g10230 (Alt. Locus), C2H2 transcription factor (Egr2), putative
AFUA_5G11080	1.03755	2.05274	Afu5g11080 (Alt. Locus), MFS multidrug transporter, putative
AFUA_5G02020	1.03634	2.05102	Afu5g02020 (Alt. Locus), aldehyde reductase (GliO), putative, aldo-keto reductase family 7 protein, similar to aflatoxin B1 aldehyde reductase AFAR (GI:4104867) (Homo sapiens) contains an AKR domain similar to GB:AAS92553.1: SirO (Leptosphaeria maculans), (1.1.1.-)
AFUA_2G06150	1.0359	2.0504	Afu2g06150 (Alt. Locus), protein disulfide isomerase Pdi1, putative, similar to protein disulfide isomerase, multifunctional protein resident in the endoplasmic reticulum lumen, essential for the formation of disulfide bonds in secretory and cell-surface proteins, unscrambles non-native disulfide bonds; Pdi1p (GI:6319806) (Saccharomyces cerevisiae), (5.3.4.1)
AFUA_5G13530	1.03543	2.04972	Afu5g13530 (Alt. Locus), exosome complex subunit Csl4, putative, similar to subunit of the exosome, which is an essential complex present in both nucleus and cytoplasm that mediates RNA processing and degradation; Csl4p (GI:6324097) (Saccharomyces cerevisiae), (3.1.13.-)
AFUA_2G02140	1.03534	2.04959	Afu2g02140 (Alt. Locus), CUE domain protein, putative
AFUA_3G12710	1.03509	2.04924	Afu3g12710 (Alt. Locus), conserved hypothetical protein
AFUA_1G16360	1.03242	2.04545	Afu1g16360 (Alt. Locus), hypothetical protein
AFUA_3G04130	1.03159	2.04427	Afu3g04130 (Alt. Locus), glutamyl-tRNA amidotransferase, A subunit, putative
AFUA_1G06040	1.03078	2.04313	Afu1g06040 (Alt. Locus), sterol o-acyltransferase (APE2), putaitve, contains an MBOAT domain similar to Acyl-CoA:sterol acyltransferase Are2p (GI:6324346) (Saccharomyces cerevisiae), (2.3.1.26)
AFUA_1G12650	1.03051	2.04275	Afu1g12650 (Alt. Locus), 3-ketoacyl-CoA ketothiolase (Kat1), putative, similar to putative 3-ketoacyl-CoA thiolase; kat1 (GI:10129973) (Aspergillus oryzae) similar to peroxisomal acetyl-CoA acyltransferase; POT1 (GI:5532) (Yarrowia lipolytica), (2.3.1.16)
AFUA_2G13050	1.03002	2.04206	Afu2g13050 (Alt. Locus), arylesterase/monoxygenase
AFUA_2G01870	1.02757	2.03859	Afu2g01870 (Alt. Locus)chsA (Gene Name), , chitin synthase A, (2.4.1.16)
AFUA_4G09330	1.02678	2.03747	Afu4g09330 (Alt. Locus), conserved hypothetical protein
AFUA_1G16340	1.02658	2.03719	Afu1g16340 (Alt. Locus), potassium transporter, putative
AFUA_5G11750	1.02516	2.03518	Afu5g11750 (Alt. Locus), LON domain serine protease, putative, (3.4.21.53)
AFUA_2G11180	1.02404	2.0336	Afu2g11180 (Alt. Locus), developmental regulator FlbA, similar to developmental regulator flbA (Swiss-Prot:P38093) (Emericella nidulans) similar to SST2 protein (Swiss-Prot:P11972) (Saccharomyces cerevisiae)
AFUA_6G07870	1.02294	2.03206	Afu6g07870 (Alt. Locus), mitochondrial GTPase (Miro-2), putative, similar to mitochondrial Rho 2; Miro-2 (GI:25187967) (Homo sapiens) PMID: 12482879 PMID: 14521508
AFUA_4G10960	1.0228	2.03186	Afu4g10960 (Alt. Locus), conserved hypothetical protein
AFUA_1G14490	1.02254	2.03149	Afu1g14490 (Alt. Locus), aminotransferase, putative
AFUA_3G14210	1.02216	2.03096	Afu3g14210 (Alt. Locus), conserved hypothetical protein
AFUA_3G06030	1.02124	2.02967	Afu3g06030 (Alt. Locus), ubiquitin conjugating enzyme (UbcD), putative, similar to ubiquitin-conjugating enzyme E2 4 (Swiss-Prot:P15731) (Saccharomyces cerevisiae) similar to GB:CAG33197.1: UBE2D3 (Homo sapiens) PMID: 8530467 similar to UbcH5B (GI:1145689) (Homo sapiens) PMID: 8530467, (6.3.2.19)
AFUA_4G01400	1.02095	2.02925	Afu4g01400 (Alt. Locus), ThiJ/PfpI family protein, contains a ThiJ/PfpI domain
AFUA_4G07340	1.02034	2.02839	Afu4g07340 (Alt. Locus), ubiquitin fusion degradation protein UfdB, putative, similar to ubiquitin conjugation factor E4; UFD2 (Q9HE05) (Schizosaccahromyces pombe) similar to ubiquitin conjugation factor E4; Ufd2p (P54860) (Saccharomyces cerevisiae)
AFUA_7G06050	1.01938	2.02704	Afu7g06050 (Alt. Locus), DNA damage-inducible v-SNARE binding protein Ddi1, putative, similar to DNA-damage inducible protein DDI1-like (GI:21537297) (Arabidopsis thaliana) similar to DNA damage-inducible v-SNARE binding protein, contains a ubiquitin-associated (UBA) domain, may act as a negative regulator of constitutive exocytosis, may play a role in S-phase checkpoint control; Ddi1p (GI:632099…
AFUA_3G12630	1.01806	2.02519	Afu3g12630 (Alt. Locus), cytochrome b561, putative, Cytochrome b561 (GI:8469163) (Xenopus laevis)
AFUA_1G03730	1.01749	2.02439	Afu1g03730 (Alt. Locus), MFS transporter, putative, similar to member of major facilitator superfamily multidrug-resistance protein family YCR023C (SP:P25351)(Saccharomyces cerevisiae)
AFUA_4G00640	1.01695	2.02364	Afu4g00640 (Alt. Locus), macrophomate synthase, putative, (4.1.2.-)
AFUA_6G12320	1.01481	2.02064	Afu6g12320 (Alt. Locus), conserved hypothetical protein
AFUA_6G07890	1.01453	2.02024	Afu6g07890 (Alt. Locus), telomere silencing protein Zds1, putative, similar to protein that interacts with silencing proteins at the telomere, involved in transcriptional silencing; has a role in localization of Bcy1p, a regulatory subunit of protein kinase A; implicated in mRNA nuclear export; Zds1p (GI:6323929) (Saccharomyces cerevisiae)
AFUA_7G04820	1.01183	2.01646	Afu7g04820 (Alt. Locus), C6 transcription factor, putative
AFUA_4G13450	1.01125	2.01566	Afu4g13450 (Alt. Locus), RNA methyltransferase, TrmH family family, (2.1.1.-)
AFUA_4G14640	1.01109	2.01544	Afu4g14640 (Alt. Locus), low affinity iron transporter, putative
AFUA_1G06970	1.01088	2.01514	Afu1g06970 (Alt. Locus), conserved hypothetical protein
AFUA_1G05410	1.01084	2.01509	Afu1g05410 (Alt. Locus), ribosome biogenesis protein Kri1, similar to essential nucleolar protein required for 40S ribosome biogenesis; physically and functionally interacts with Krr1p; Kri1p (GI:6324021) (Saccharomyces cerevisiae)
AFUA_3G07290	1.0098	2.01363	Afu3g07290 (Alt. Locus), SD08430p
AFUA_4G10000	1.00837	2.01164	Afu4g10000 (Alt. Locus)mdr2 (Gene Name), , ABC multidrug transporter Mdr2, identical to multidrug resistance protein 2 (Aspergillus fumigatus) (GI:2673957) PUBMED:9373135
AFUA_7G01930	1.00673	2.00935	Afu7g01930 (Alt. Locus), GTP-binding protein EsdC, similar to GB:AAM95965.1: EsdC (Emericella nidulans)
AFUA_5G11370	1.00643	2.00893	Afu5g11370 (Alt. Locus), Ser/Thr protein phosphatase, (3.1.3.16)
AFUA_2G13090	1.00588	2.00817	Afu2g13090 (Alt. Locus), RNA polymerase II subunit 3
AFUA_3G07620	1.00457	2.00635	Afu3g07620 (Alt. Locus), ABC1 domain protein
AFUA_1G13850	1.00449	2.00624	Afu1g13850 (Alt. Locus), conserved hypothetical protein
AFUA_3G12240	1.00377	2.00524	Afu3g12240 (Alt. Locus), hypothetical protein
AFUA_4G14740	1.00371	2.00515	Afu4g14740 (Alt. Locus), serine/threonine protein kinase (Ark1), putative, similar to S. pombe Aurora-related kinase ARK1 SP:O59790, (2.7.1.-)
AFUA_6G13640	1.00256	2.00355	Afu6g13640 (Alt. Locus), conserved hypothetical protein
AFUA_3G10770	1.00212	2.00293	Afu3g10770 (Alt. Locus), RTA1 domain protein, putative
AFUA_4G13480	1.00112	2.00155
